# Supplementary material
Source: publisher figshare collection journal article supplement (https://acs.figshare.com/ndownloader/files/5361113)
Supplement: Supplementary file 1 [file 5361113]

# Ligand-Enabled, Copper-Catalyzed Regio- and Stereoselective Synthesis of Trialkylsubstituted Alkenylboronates from Unactivated Internal Alkynes

Taisuke Itoh, Yohei Shimizu and Motomu Kanai\*

*Graduate School of Pharmaceutical Sciences, The University of Tokyo,  
and JST-ERATO, Kanai Life Science Catalysis Project*

## Supporting Information

### Table of Contents

|                                                                                                 |      |
|-------------------------------------------------------------------------------------------------|------|
| 1. General Information .....                                                                    | S-2  |
| 2. Preparation of Substrates .....                                                              | S-2  |
| 3. Synthesis of <sup>NQ</sup> IMesCuCl .....                                                    | S-7  |
| 4. Optimization Study: Solvent Effect and Base Effect .....                                     | S-7  |
| 5. Copper-Catalyzed Regioselective Borylalkylation of Dialkylsubstituted Internal Alkynes ..... | S-8  |
| 6. Applications.....                                                                            | S-18 |
| 7. References .....                                                                             | S-19 |
| 8. NMR spectra .....                                                                            | S-20 |

## 1. General Information

NMR spectra were recorded on JEOL ECX500 (500 MHz for  $^1\text{H}$  NMR and 125 MHz for  $^{13}\text{C}$  NMR) spectrometers. Chemical shifts were reported in ppm on the  $\delta$  scale relative to TMS ( $\delta = 0.00$  for  $^1\text{H}$  NMR and  $\delta = 0.00$  for  $^{13}\text{C}$  NMR) as an internal reference. Infrared (IR) spectra were recorded on a JASCO FT/IR 410 Fourier transform infrared spectrophotometer. ESI- and DART-mass spectra were measured on a JEOL JMS-T100LC AccuTOF spectrometer for HRMS. Microwave reactions were performed on Biotage Initiator. Normal phase column chromatographies were performed with Biotage Isolera One and Biotage SNAP Ultra. Gel permeation chromatographies (GPC) were performed with JAI LC-9210 NEXT. Reactions were carried out in dry solvents under an argon atmosphere, unless otherwise stated. Reagents were used as received from commercial sources, unless otherwise stated.

## 2. Preparation of Substrates

2-Octyne (**2b**), 4-methyl-1-butyne (**2c**), 3-hexyne (**2d**) and 1-phenyl-1-hexyne (**2m**) were purchased from commercial vendors and used after Kugelrohr distillation. 5-Phenyl-1-pentyne (**2n**) was purchased from a commercial vendor and used after silica gel column chromatography (eluent: hexane). 1-Iodobutane (**3a**), 1-iodo-3-phenylpropane (**3b**), (iodomethyl)cyclopropane (**3e**), iodomethane (**3f**), benzyl bromide (**3g**), ethyl bromoacetate (**3h**), 1-iodo-2-methylpropane (**3i**),  $(\text{Bpin})_2$ ,  $\text{KO}^t\text{Bu}$ , and dehydrated DMF were purchased from commercial vendors and used without any purification. *tert*-Butyldimethylsilyl(3-pentynoxy)silane (**2e**) was synthesized referring to the reported procedure.<sup>1</sup>

### Benzyl 3-pentynyl ether (**2a**)

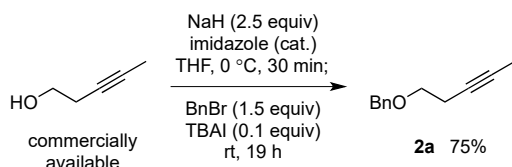

To a dried 300 mL flask were added NaH (3.25 g, 81.3 mmol) and THF (100 mL). The resulting mixture was stirred at 0 °C, before 3-pentyn-1-ol (3.00 mL, 32.5 mmol) and imidazole (1 small crystal) were added. The resulting mixture was stirred at 0 °C for 30 min, before benzyl bromide (5.80 mL, 48.8 mmol) and TBAI (1.20 g, 3.25 mmol) were added. The resulting mixture was stirred at ambient temperature for 19 h. The reaction was quenched with water, and extracted three times with ether. The combined organic layer was washed with brine, and dried over  $\text{Na}_2\text{SO}_4$ . After filtration and evaporation, the residue was purified by silica gel column chromatography (eluent: hexane/AcOEt = 49/1→19/1) to give pale yellow oil. After Kugelrohr distillation, pure **2a** was obtained as colorless oil (4.24 g, 24.3 mmol, 75%). The spectral data were identical with the reported value.<sup>2</sup>

### 3-Pentynyl pivalate (2f)

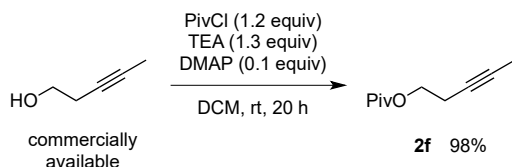

To a dried 200 mL flask were added 3-pentyn-1-ol (2.00 mL, 21.8 mmol), triethylamine (4.00 mL, 28.4 mmol), DMAP (0.270 g, 2.18 mmol) and DCM (44 mL). The resulting mixture was stirred at 0 °C, before pivaloyl chloride (3.20 mL, 26.2 mmol) was added. The resulting mixture was stirred at 0 °C for 5 min, and then at ambient temperature for 20 h. The reaction mixture was filtrated through a short pad of silica gel (eluted with DCM). After evaporation, the residue was purified by silica gel column chromatography (eluent: hexane/AcOEt = 9/1) to give colorless oil. After Kugelrohr distillation, pure **2f** was obtained as colorless oil (3.58 g, 21.3 mmol, 98%).

<sup>1</sup>H NMR (500 MHz, CDCl<sub>3</sub>): δ 4.11 (t, *J* = 7.0 Hz, 2H), 2.45 (qt, *J* = 2.4 Hz, 7.0 Hz, 2H), 1.76 (t, *J* = 2.4 Hz, 3H), 1.20 (s, 9H); <sup>13</sup>C NMR (125 MHz, CDCl<sub>3</sub>): δ 178.3, 77.1, 74.7, 62.5, 38.7, 27.1, 19.2, 3.4; IR (neat, cm<sup>-1</sup>): 3444, 2972, 2922, 2873, 1809, 1730, 1481, 1460, 1398, 1366, 1283, 1226, 1154, 1039, 1006, 941, 916, 867, 833, 770, 734; HRMS (ESI): *m/z* calcd for C<sub>10</sub>H<sub>16</sub>NaO<sub>2</sub><sup>+</sup> [*M*+Na<sup>+</sup>]: 191.1043. Found: 191.1034.

### 5-Heptynoic acid

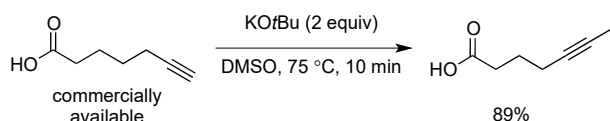

To a dried 50 mL flask were added 6-heptynoic acid (0.980 g, 7.70 mmol), KOtBu (1.73 g, 15.4 mmol) and DMSO (15 mL). The resulting mixture was stirred at 75 °C for 10 min, and then cooled with ice bath. The reaction was quenched with 1 M aq. HCl (20 mL), and extracted three times with ether. The combined organic layer was washed successively with water and brine, and dried over Na<sub>2</sub>SO<sub>4</sub>. After filtration and evaporation, the residue was purified by silica gel column chromatography (eluent: hexane/AcOEt = 4/1) to give 5-heptynoic acid as white solids (0.860 g, 6.82 mmol, 89%). The spectral data were identical with the reported value.<sup>3</sup>

### Methyl 5-heptynoate (2g)

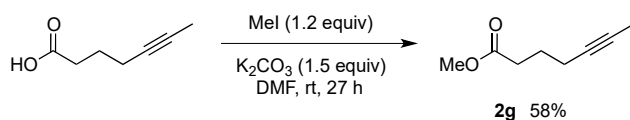

To a dried 30 mL flask were added 5-heptynoic acid (0.38 g, 3.0 mmol), K<sub>2</sub>CO<sub>3</sub> (0.62 g, 4.5 mmol) and DMF (6.0 mL). The resulting mixture was stirred at 0 °C, before iodomethane (0.22 mL, 3.6 mmol) was added. The resulting mixture was stirred at ambient temperature for 27 h. The reaction was quenched with water, and extracted three times with ether. The combined organic layer was dried over Na<sub>2</sub>SO<sub>4</sub>. After filtration and evaporation, the residue was purified by silica gel column

chromatography (eluent: hexane/AcOEt = 19/1) to give **2g** as colorless oil (0.24 g, 1.7 mmol, 58%). The spectral data were identical with the reported value.<sup>4</sup>

#### ***N,N*-diethyl-5-heptynamide (2h)**

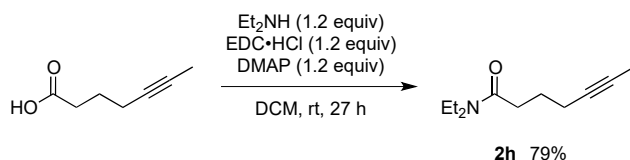

To a dried 50 mL flask were added 5-heptynoic acid (0.38 g, 3.0 mmol), EDC·HCl (0.69 g, 3.6 mmol), DMAP (0.44 g, 3.6 mmol) and DCM (15 mL). To the resulting mixture was added diethylamine (0.37 mL, 3.6 mmol). The resulting mixture was stirred at ambient temperature for 27 h. The reaction was quenched with 10% aq. citric acid, and extracted three times with DCM. The combined organic layer was dried over Na<sub>2</sub>SO<sub>4</sub>. After filtration and evaporation, the residue was purified by silica gel column chromatography (eluent: hexane/AcOEt = 9/1→4/1) to give **2h** as colorless oil (0.43 g, 2.4 mmol, 79%).

<sup>1</sup>H NMR (500 MHz, CDCl<sub>3</sub>): δ 3.37 (q, *J* = 7.1 Hz, 2H), 3.33 (q, *J* = 7.1 Hz, 2H), 2.42 (t, *J* = 7.4 Hz, 2H), 2.21 (qt, *J* = 2.6 Hz, 6.8 Hz, 2H), 1.85-1.79 (m, 2H), 1.77 (t, *J* = 2.6 Hz, 3H), 1.18 (t, *J* = 7.1 Hz, 3H), 1.11 (t, *J* = 7.1 Hz, 3H); <sup>13</sup>C NMR (125 MHz, CDCl<sub>3</sub>): δ 171.6, 78.6, 76.1, 41.9, 40.0, 31.7, 24.5, 18.3, 14.3, 13.1, 3.4; IR (neat, cm<sup>-1</sup>): 3450, 2976, 2935, 1631, 1457, 1433, 1379, 1362, 1263, 1220, 1139, 1097, 1070, 754, 664; HRMS (ESI): *m/z* calcd for C<sub>11</sub>H<sub>19</sub>NNaO<sup>+</sup> [*M*+Na<sup>+</sup>]: 204.1359. Found: 204.1352.

#### **Benzyl 2-butylnyl ether (2i)**

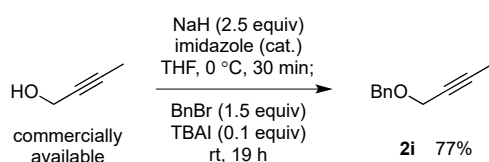

To a dried 200 mL flask were added NaH (2.68 g, 67.0 mmol) and THF (100 mL). The resulting mixture was stirred at 0 °C, before 2-butyne-1-ol (2.00 mL, 26.8 mmol) and imidazole (1 small crystal) were added. The resulting mixture was stirred at 0 °C for 30 min, before benzyl bromide (4.77 mL, 40.2 mmol) and TBAI (0.990 g, 2.68 mmol) were added. The resulting mixture was stirred at ambient temperature for 19 h. The reaction was quenched with water, and extracted three times with ether. The combined organic layer was washed with brine, and dried over Na<sub>2</sub>SO<sub>4</sub>. After filtration and evaporation, the residue was purified by silica gel column chromatography (eluent: hexane/AcOEt = 49/1→19/1) to give pale yellow oil. After Kugelrohr distillation, pure **2i** was obtained as colorless oil (3.30 g, 20.6 mmol, 77%). The spectral data were identical with the reported value.<sup>5</sup>

#### **Benzyl 2-pentylnyl ether (2j)**

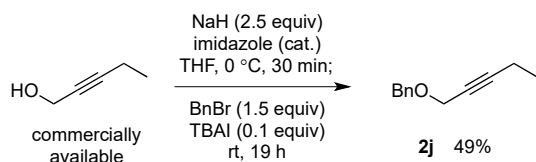

To a dried 200 mL flask were added NaH (2.16 g, 54.0 mmol) and THF (70 mL). The resulting mixture was stirred at 0 °C, before 2-pentyn-1-ol (2.00 mL, 21.6 mmol) and imidazole (1 small crystal) were added. The resulting mixture was stirred at 0 °C for 30 min, before benzyl bromide (3.85 mL, 32.4 mmol) and TBAI (0.800 g, 2.16 mmol) were added. The resulting mixture was stirred at ambient temperature for 19 h. The reaction was quenched with water, and extracted three times with ether. The combined organic layer was washed with brine, and dried over Na<sub>2</sub>SO<sub>4</sub>. After filtration and evaporation, the residue was purified by silica gel column chromatography (eluent: hexane/AcOEt = 49/1→19/1) to give pale yellow oil. After Kugelrohr distillation, pure **2j** was obtained as colorless oil (1.85 g, 10.6 mmol, 49%).

<sup>1</sup>H NMR (500 MHz, CDCl<sub>3</sub>): δ 7.36-7.32 (m, 4H), 7.30-7.28 (m, 1H), 4.58 (s, 2H), 4.15 (t, *J* = 2.1 Hz, 2H), 2.25 (qt, *J* = 2.1 Hz, 7.5 Hz, 2H), 1.16 (t, *J* = 7.5 Hz, 3H); <sup>13</sup>C NMR (125 MHz, CDCl<sub>3</sub>): δ 137.6, 128.4, 128.0, 127.7, 88.5, 75.1, 71.4, 57.7, 13.8, 12.4; IR (neat, cm<sup>-1</sup>): 3087, 3064, 3030, 2976, 2937, 2851, 2284, 2225, 1952, 1871, 1810, 1722, 1604, 1586, 1496, 1454, 1406, 1385, 1354, 1319, 1262, 1206, 1151, 1134, 1071, 1026, 955, 936, 904, 736, 698; HRMS (ESI): *m/z* calcd for C<sub>12</sub>H<sub>14</sub>NaO<sup>+</sup> [*M*+Na<sup>+</sup>]: 197.0937. Found: 197.0935.

### Benzyl 3-hexynyl ether (**2k**)

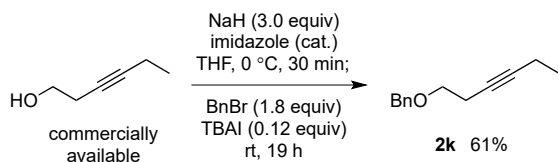

To a dried 200 mL flask were added NaH (2.16 g, 54.0 mmol) and THF (70 mL). The resulting mixture was stirred at 0 °C, before 3-hexyn-1-ol (2.00 mL, 18.2 mmol) and imidazole (1 small crystal) were added. The resulting mixture was stirred at 0 °C for 30 min, before benzyl bromide (3.85 mL, 32.4 mmol) and TBAI (0.800 g, 2.16 mmol) were added. The resulting mixture was stirred at ambient temperature for 19 h. The reaction was quenched with water, and extracted three times with ether. The combined organic layer was washed with brine, and dried over Na<sub>2</sub>SO<sub>4</sub>. After filtration and evaporation, the residue was purified by silica gel column chromatography (eluent: hexane/AcOEt = 49/1→19/1) to give yellow oil. After Kugelrohr distillation, pure **2k** was obtained as colorless oil (2.08 g, 11.0 mmol, 61%). The spectral data were identical with the reported value.<sup>2</sup>

### *N,N*-dibenzyl-2-heptynylamine (**2l**)

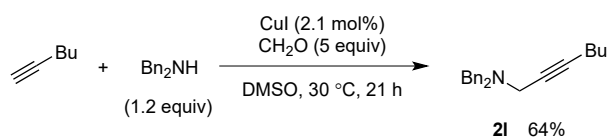

To a dried 100 mL flask were added CuI (40.0 mg, 0.210 mmol), dibenzylamine (2.30 mL, 12.0 mmol) and DMSO (20 mL). To the resulting mixture were added formaldehyde solution (37%, 4.00 mL) and 1-hexyne (1.15 mL, 10.0 mmol). The resulting mixture was stirred at 30 °C for 21 h. The reaction was quenched with water, and extracted three times with ether. The combined organic layer was washed with brine, and dried over Na<sub>2</sub>SO<sub>4</sub>. After filtration and evaporation, the residue was purified by silica gel column chromatography (eluent: hexane/AcOEt = 19/1→9/1) to give **2l** as colorless oil (1.85 g, 6.35 mmol, 64%). The spectral data were identical with the reported value.<sup>6</sup>

### 5-Iodo-1-pentene (**3c**)

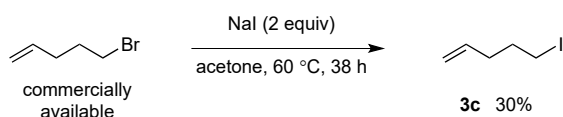

To a dried screw cap tube were added 5-bromo-1-pentene (1.18 mL, 10.0 mmol), NaI (3.00 g, 20.0 mmol) and acetone (20 mL). After the tube was sealed with a cap, the resulting mixture was stirred at 60 °C for 38 h. After filtration and evaporation, the residue was diluted with ether, washed successively with water and brine, and dried over Na<sub>2</sub>SO<sub>4</sub>. After filtration and evaporation, the residue was purified by silica gel column chromatography (eluent: hexane) to give **3c** as colorless oil (0.593 g, 3.03 mmol, 30%). The yield was decreased because **3c** was volatile under reduced pressure. The spectral data were identical with the reported value.<sup>7</sup>

### Ethyl 4-iodobutyrate (**3d**)

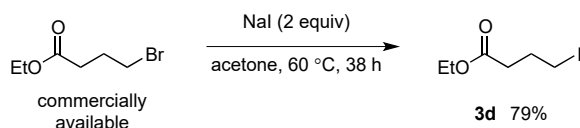

To a dried screw cap tube were added ethyl 4-bromobutyrate (0.72 mL, 5.0 mmol), NaI (1.5 g, 10 mmol) and acetone (10 mL). After the tube was sealed with a cap, the resulting mixture was stirred at 60 °C for 37 h. After filtration and evaporation, the residue was diluted with ether, washed successively with water and brine, and dried over Na<sub>2</sub>SO<sub>4</sub>. After filtration and evaporation, the residue was purified by silica gel column chromatography (eluent: hexane/AcOEt = 19/1) to give **3d** as colorless oil (0.95 g, 3.9 mmol, 79%). The spectral data were identical with the reported value.<sup>8</sup>

### 3. Synthesis of <sup>NQ</sup>IMesCuCl

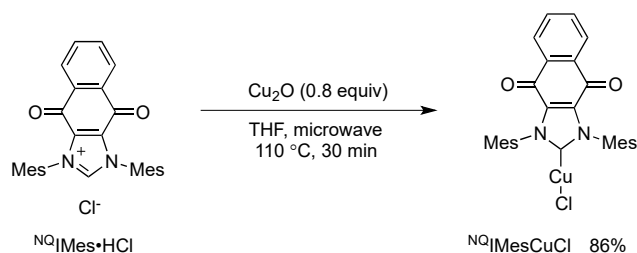

<sup>NQ</sup>IMes•HCl was synthesized according to the reported procedure.<sup>9</sup> To a dried 0.5-2 mL microwave vessel were added <sup>NQ</sup>IMes•HCl (0.24 g, 0.51 mmol), Cu<sub>2</sub>O (0.057 g, 0.40 mmol) and THF (4 mL). The resulting mixture was reacted in the microwave reactor for 30 min at 110 °C. The reaction mixture was filtrated through a short pad of celite (eluted with DCM). After evaporation, the residue was redissolved in DCM. The resulting red solution was diluted with pentane to give a yellow precipitation. After filtration, <sup>NQ</sup>IMesCuCl was obtained as yellow powder (0.22 g, 0.44 mmol, 86%).

<sup>1</sup>H NMR (500 MHz, CDCl<sub>3</sub>): δ 8.08 (dd, *J* = 3.2 Hz, 5.8 Hz, 2H), 7.78 (dd, *J* = 3.2 Hz, 5.8 Hz, 2H), 7.08 (s, 4H), 2.40 (s, 6H), 2.09 (s, 12H); <sup>13</sup>C NMR (125 MHz, CDCl<sub>3</sub>): δ 188.5, 174.3, 140.3, 134.8, 133.6, 133.0, 132.0, 129.8, 127.2, 21.3, 17.9; IR (neat, cm<sup>-1</sup>): 3343, 2987, 2918, 1727, 1678, 1589, 1570, 1481, 1411, 1321, 1305, 1264, 1217, 1194, 1072, 1032, 954, 941, 853, 793, 754, 721, 691, 664; HRMS (ESI): *m/z* calcd for C<sub>29</sub>H<sub>26</sub>ClCuN<sub>2</sub>NaO<sub>2</sub><sup>+</sup> [*M*+Na<sup>+</sup>]: 555.0871. Found: 555.0860.

### 4. Optimization Study: Base Effect and Solvent Effect<sup>a</sup>

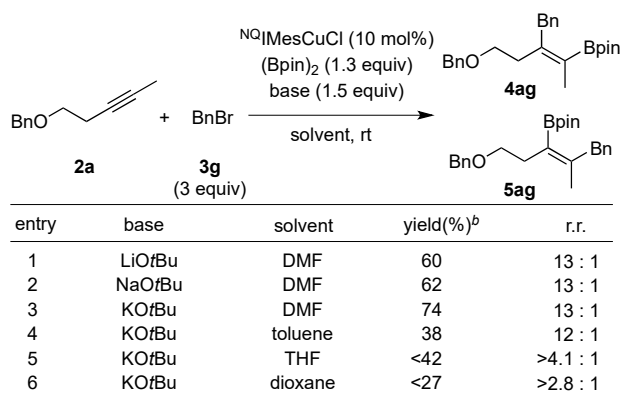

<sup>a</sup>General reaction conditions: **2a** (0.10 mmol), **3g** (3 equiv), <sup>NQ</sup>IMesCuCl (10 mol%), (Bpin)<sub>2</sub> (1.3 equiv), and base (1.5 equiv) in solvent (0.5 mL) at rt for 4 h. Yield and regioisomeric ratio (r.r. = **4ag** : **5ag**) were determined by <sup>1</sup>H NMR analysis of a crude mixture using 1,1,2,2-tetrachloroethane as an internal standard. <sup>b</sup>Combined yield of **4ag** and **5ag**.

DMF was the optimum solvent regarding both product yield and regioselectivity. The base did not affect regioselectivity, but KOtBu produced the highest reactivity.

## 5. Copper-Catalyzed Regioselective Borylalkylation of Dialkylsubstituted Internal Alkynes

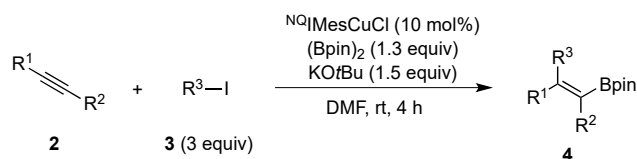

$\text{NQIMesCuCl}$  (10.6 mg, 0.0200 mmol) and  $(\text{Bpin})_2$  (66.0 mg, 0.260 mmol) were weighed and added to a test tube under air. The test tube was transferred to an Ar filled glove box.  $\text{KOtBu}$  (33.6 mg, 0.300 mmol) was added to the test tube in the glove box. The test tube was sealed with a rubber septum, and removed from the glove box. Dehydrated DMF (1.0 mL, commercially available from Kanto Chemical Co., Inc.) was added by syringe. The resulting mixture was stirred at 0 °C for 10 min, before **2** (0.200 mmol) and **3** (0.600 mmol) were added. The resulting mixture was stirred at ambient temperature with water bath for 4 h. The reaction was quenched with sat. aq.  $\text{NH}_4\text{Cl}$ , extracted three times with hexane/ $\text{AcOEt}$  = 4/1, and dried over  $\text{Na}_2\text{SO}_4$ . After filtration and evaporation, the residue was purified by silica gel column chromatography to give a mixture of **4** and **5**, with **4** as the major isomer. The stereochemistry of **4** was assigned based on the NOE measurement (see below).

### (*Z*)-2-(3-(2-(benzyloxy)ethyl)hept-2-en-2-yl)-4,4,5,5-tetramethyl-1,3,2-dioxaborolane (**4aa**)

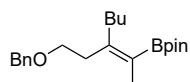

**2a** (36.0  $\mu\text{L}$ , 0.200 mmol) and **3a** (68.0  $\mu\text{L}$ , 0.600 mmol) were used to give the crude product (r.r. = 10.2 : 1). The crude product was purified by silica gel column chromatography (eluent: hexane/ $\text{AcOEt}$  = 49/1) to give an inseparable mixture of **4aa** and **5aa** as colorless oil (64.5 mg, 0.180 mmol, 90%, r.r. = 9.7 : 1).

$R_f$  = 0.30 (twice with hexane/ $\text{AcOEt}$  = 30/1);  $^1\text{H}$  NMR (500 MHz,  $\text{CDCl}_3$ ):  $\delta$  7.36-7.25 (m, 5H, **4aa+5aa**), 4.51 (s, 2H, **4aa+5aa**), 3.47 (t,  $J$  = 7.9 Hz, 2H, **4aa**), 3.39 (t,  $J$  = 7.9 Hz, 2H, **5aa**), 2.48 (t,  $J$  = 7.9 Hz, 2H, **4aa+5aa**), 2.29 (t,  $J$  = 7.7 Hz, 2H, **4aa+5aa**), 1.74 (s, 3H, **5aa**), 1.59 (s, 3H, **4aa**), 1.38-1.22 (m, 16H, **4aa+5aa**), 0.88 (t,  $J$  = 7.1 Hz, 3H, **4aa+5aa**);  $^{13}\text{C}$  NMR (125 MHz,  $\text{CDCl}_3$ ):  $\delta$  151.5, 138.5, 128.3, 127.6, 127.4, 82.7, 72.8, 68.4, 36.2, 33.2, 32.3, 24.7, 24.7, 22.8, 16.3, 14.0 (The carbon directly attached to the boron atom was not detected due to quadrupolar relaxation); IR (neat,  $\text{cm}^{-1}$ ): 3420, 2972, 2959, 2928, 2857, 2359, 1623, 1455, 1357, 1286, 1209, 1147, 1089, 961, 854, 734, 696; HRMS (ESI):  $m/z$  calcd for  $\text{C}_{22}\text{H}_{35}\text{BNaO}_3^+ [\text{M}+\text{Na}^+]$ : 381.2571. Found: 381.2560.

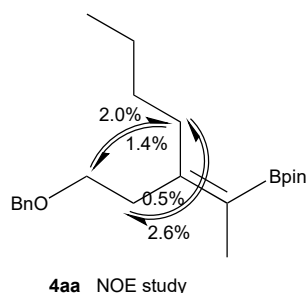



**(Z)-2-(3-butyloct-2-en-2-yl)-4,4,5,5-tetramethyl-1,3,2-dioxaborolane (4ba)**

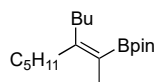

**2b** (29.0  $\mu$ L, 0.200 mmol) and **3a** (68.0  $\mu$ L, 0.600 mmol) were used to give the crude product (r.r. = 6.9 : 1). The crude product was purified by silica gel column chromatography (eluent: hexane/AcOEt = 99/1) to give an inseparable mixture of **4ba** and **5ba** as colorless oil (43.5 mg, 0.147 mmol, 74%, r.r. = 9.0 : 1).

$R_f$  = 0.40 (twice with hexane/AcOEt = 30/1);  $^1\text{H}$  NMR (500 MHz,  $\text{CDCl}_3$ ):  $\delta$  2.28 (t,  $J$  = 7.4 Hz, 2H, **4ba+5ba**), 2.07 (t, 7.9 Hz, 2H, **4ba+5ba**), 1.69 (s, 3H, **5ba**), 1.67 (s, 3H, **4ba**), 1.37-1.24 (m, 10H, **4ba+5ba**), 1.27 (s, 12H, **4ba+5ba**) 0.91-0.87 (m, 6H, **4ba+5ba**);  $^{13}\text{C}$  NMR (125 MHz,  $\text{CDCl}_3$ ):  $\delta$  156.6, 82.6, 35.7, 32.7, 32.4, 32.3, 27.7, 24.8, 22.9, 22.6, 16.1, 14.0 (The carbon directly attached to the boron atom was not detected due to quadrupolar relaxation); IR (neat,  $\text{cm}^{-1}$ ): 3466, 2972, 2957, 2929, 2859, 1619, 1540, 1507, 1465, 1357, 1284, 1213, 1148, 1092, 966, 856, 691, 670; HRMS (DART):  $m/z$  calcd for  $\text{C}_{18}\text{H}_{36}\text{BO}_2^+ [\text{M}+\text{H}^+]$ : 295.2803. Found: 295.2793.

**(Z)-2-(3-isopropylhept-2-en-2-yl)-4,4,5,5-tetramethyl-1,3,2-dioxaborolane (4ca)**

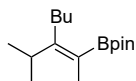

**2c** (23.0  $\mu$ L, 0.200 mmol) and **3a** (68.0  $\mu$ L, 0.600 mmol) were used to give the crude product (r.r. could not be determined due to overlapped impurities). The crude product was purified by silica gel column chromatography (eluent: hexane/AcOEt = 49/1) and GPC to give an inseparable mixture of **4ca** and **5ca** as colorless oil (27.0 mg, 0.101 mmol, 51%, r.r. = 17.2 : 1).

$R_f$  = 0.51 (twice with hexane/AcOEt = 30/1);  $^1\text{H}$  NMR (500 MHz,  $\text{CDCl}_3$ ):  $\delta$  2.93 (sept,  $J$  = 6.9 Hz, 1H, **4ca**), 2.65 (sept,  $J$  = 6.9 Hz, 1H, **5ca**), 2.20 (t,  $J$  = 7.9 Hz, 2H, **4ca**), 2.08 (t,  $J$  = 7.7 Hz, 2H, **5ca**), 1.69 (s, 3H, **4ca**), 1.66 (s, 3H, **5ca**), 1.39-1.19 (m, 4H, **4ca+5ca**), 1.26 (s, 12H, **4ca+5ca**), 1.01 (d,  $J$  = 6.9 Hz, 6H, **5ca**), 0.98 (d,  $J$  = 6.9 Hz, 6H, **4ca**), 0.89 (t,  $J$  = 7.0 Hz, 3H, **4ca+5ca**);  $^{13}\text{C}$  NMR (125 MHz,  $\text{CDCl}_3$ ):  $\delta$  160.5, 82.6, 35.2, 31.1, 30.6, 24.8, 23.5, 20.8, 15.5, 14.0 (The carbon directly attached to the boron atom was not detected due to quadrupolar relaxation); IR (neat,  $\text{cm}^{-1}$ ): 2959, 2929, 2872, 1607, 1457, 1375, 1353, 1282, 1146, 1086, 966, 865, 765, 730; HRMS (DART):  $m/z$  calcd for  $\text{C}_{16}\text{H}_{32}\text{BO}_2^+ [\text{M}+\text{H}^+]$ : 267.2490. Found: 267.2502.

**(E)-2-(4-ethyloct-3-en-3-yl)-4,4,5,5-tetramethyl-1,3,2-dioxaborolane (4da)**

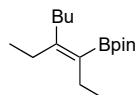

**2d** (23.0  $\mu$ L, 0.200 mmol) and **3a** (68.0  $\mu$ L, 0.600 mmol) were used to give the crude product. The crude product was purified by silica gel column chromatography (eluent: hexane/AcOEt = 99/1) to give pure **4da** as colorless oil (44.0 mg, 0.165 mmol, 83%).

$R_f$  = 0.44 (twice with hexane/AcOEt = 30/1);  $^1\text{H}$  NMR (500 MHz,  $\text{CDCl}_3$ ):  $\delta$  2.25 (t,  $J$  = 7.6 Hz, 2H), 2.14-2.07 (m, 4H), 1.36-1.24 (m, 4H), 1.28 (s, 12H), 0.97 (dt,  $J$  = 0.9 Hz, 7.6 Hz, 3H), 0.93 (dt,  $J$  = 0.9 Hz, 7.6 Hz, 3H), 0.89 (t,  $J$  = 7.1 Hz,

3H);  $^{13}\text{C}$  NMR (125 MHz,  $\text{CDCl}_3$ ):  $\delta$  155.3, 82.6, 35.3, 32.4, 24.8, 24.7, 23.7, 23.0, 15.2, 14.0, 13.5 (The carbon directly attached to the boron atom was not detected due to quadrupolar relaxation); IR (neat,  $\text{cm}^{-1}$ ): 3420, 3011, 2963, 2931, 2871, 1617, 1466, 1389, 1372, 1358, 1318, 1284, 1256, 1215, 1146, 1109, 1036, 965, 927, 869, 852, 760, 668; HRMS (DART):  $m/z$  calcd for  $\text{C}_{16}\text{H}_{32}\text{BO}_2^+ [\text{M}+\text{H}^+]$ : 267.2490. Found: 267.2499.

**(Z)-tert-butyl dimethyl((3-(1-(4,4,5,5-tetramethyl-1,3,2-dioxaborolan-2-yl)ethylidene)heptyl)oxy)silane (4ea)**

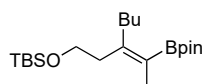

**2e** (48.0  $\mu\text{L}$ , 0.200 mmol) and **3a** (68.0  $\mu\text{L}$ , 0.600 mmol) were used to give the crude product (r.r. = 11.6 : 1). The crude product was purified by silica gel column chromatography (eluent: hexane/AcOEt = 49/1) to give an inseparable mixture of **4ea** and **5ea** as colorless oil (69.7 mg, 0.182 mmol, 91%, r.r. = 9.8 : 1).

$R_f$  = 0.43 (twice with hexane/AcOEt = 30/1);  $^1\text{H}$  NMR (500 MHz,  $\text{CDCl}_3$ ):  $\delta$  3.59 (t,  $J$  = 8.0 Hz, 2H, **4ea**), 3.51 (t,  $J$  = 8.0 Hz, 2H, **5ea**), 2.38 (t,  $J$  = 8.0 Hz, 2H, **4ea+5ea**), 2.28 (t,  $J$  = 7.6 Hz, 2H, **4ea+5ea**), 1.75 (s, 3H, **5ea**), 1.69 (s, 3H, **4ea**), 1.38-1.22 (m, 16H, **4ea+5ea**), 0.89 (t,  $J$  = 7.2 Hz, 3H, **4ea+5ea**), 0.89 (s, 9H, **4ea+5ea**), 0.05 (s, 6H, **4ea+5ea**);  $^{13}\text{C}$  NMR (125 MHz,  $\text{CDCl}_3$ ):  $\delta$  151.7, 82.7, 61.5, 36.6, 36.3, 32.2, 26.0, 24.7, 22.8, 18.3, 16.3, 14.0, -5.2 (The carbon directly attached to the boron atom was not detected due to quadrupolar relaxation); IR (neat,  $\text{cm}^{-1}$ ): 3446, 3018, 2957, 2929, 2857, 2399, 1620, 1520, 1470, 1358, 1285, 1255, 1215, 1146, 1082, 1005, 964, 929, 836, 756, 691, 669, 626; HRMS (ESI):  $m/z$  calcd for  $\text{C}_{21}\text{H}_{43}\text{BNaO}_3\text{Si}^+ [\text{M}+\text{Na}^+]$ : 405.2967. Found: 405.2971.

**(Z)-3-(1-(4,4,5,5-tetramethyl-1,3,2-dioxaborolan-2-yl)ethylidene)heptyl pivalate (4fa)**

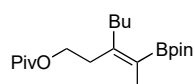

**2f** (38.0  $\mu\text{L}$ , 0.200 mmol) and **3a** (68.0  $\mu\text{L}$ , 0.600 mmol) were used to give the crude product (r.r. = 8.1 : 1). The crude product was purified by silica gel column chromatography (eluent: hexane/AcOEt = 49/1) to give an inseparable mixture of **4fa** and **5fa** as colorless oil (57.1 mg, 0.162 mmol, 81%, r.r. = 7.5 : 1).

$R_f$  = 0.32 (twice with hexane/AcOEt = 30/1);  $^1\text{H}$  NMR (500 MHz,  $\text{CDCl}_3$ ):  $\delta$  4.05 (t,  $J$  = 7.7 Hz, 2H, **4fa**), 3.98 (t,  $J$  = 7.6 Hz, 2H, **4fa**), 2.36 (t,  $J$  = 7.6 Hz, 2H, **4fa**), 2.32 (t,  $J$  = 7.7 Hz, 2H, **4fa**), 1.79 (s, 3H, **4fa**), 1.73 (s, 3H, **4fa**), 1.39-1.13 (m, 4H, **4fa+5fa**), 1.26 (s, 12H, **4fa+5fa**), 1.19 (s, 9H, **4fa+5fa**), 0.90 (t,  $J$  = 7.1 Hz, 3H, **4fa+5fa**);  $^{13}\text{C}$  NMR (125 MHz,  $\text{CDCl}_3$ ):  $\delta$  178.6, 150.4, 82.8, 62.5, 38.6, 35.9, 32.2, 31.8, 27.2, 27.2, 24.7, 22.8, 16.4, 14.0 (The carbon directly attached to the boron atom was not detected due to quadrupolar relaxation); IR (neat,  $\text{cm}^{-1}$ ): 3420, 3019, 2978, 2931, 2872, 2399, 1717, 1622, 1480, 1457, 1359, 1287, 1215, 1146, 1090, 1034, 965, 852, 756, 669; HRMS (ESI):  $m/z$  calcd for  $\text{C}_{20}\text{H}_{37}\text{BNaO}_4^+ [\text{M}+\text{Na}^+]$ : 375.2677. Found: 375.2668.

**(Z)-methyl 5-(1-(4,4,5,5-tetramethyl-1,3,2-dioxaborolan-2-yl)ethylidene)nonanoate (4ga)**

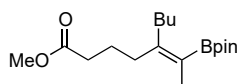

**2g** (29.0  $\mu$ L, 0.200 mmol) and **3a** (68.0  $\mu$ L, 0.600 mmol) were used to give the crude product (r.r. could not be determined due to overlapped impurities). The crude product was purified by silica gel column chromatography (eluent: hexane/AcOEt = 49/1) to give an inseparable mixture of **4ga** and **5ga** as colorless oil (51.5 mg, 0.159 mmol, 79%, r.r. = 10.3 : 1).

$R_f$  = 0.11 (twice with hexane/AcOEt = 30/1);  $^1\text{H}$  NMR (500 MHz,  $\text{CDCl}_3$ ):  $\delta$  3.66 (s, 3H, **4ga**), 3.65 (s, 3H, **5ga**), 2.33-2.27 (m, 4H, **4ga+5ga**), 2.12 (t,  $J$  = 8.0 Hz, 2H, **4ga+5ga**), 1.67 (s, 3H, **4ga**), 1.64 (s, 3H, **5ga**), 1.35-1.25 (m, 4H, **4ga+5ga**), 1.26 (s, 12H, **4ga+5ga**), 0.89 (t,  $J$  = 7.1 Hz, 3H, **4ga+5ga**);  $^{13}\text{C}$  NMR (125 MHz,  $\text{CDCl}_3$ ):  $\delta$  174.1, 154.6, 82.7, 51.4, 35.4, 34.1, 32.3, 31.7, 24.8, 23.2, 22.9, 16.1, 14.0 (The carbon directly attached to the boron atom was not detected due to quadrupolar relaxation); IR (neat,  $\text{cm}^{-1}$ ): 3446, 3016, 2981, 2955, 2933, 2870, 1732, 1619, 1461, 1437, 1360, 1284, 1215, 1146, 1109, 1088, 965, 860, 756, 690, 668; HRMS (ESI):  $m/z$  calcd for  $\text{C}_{18}\text{H}_{33}\text{BNaO}_4^+$  [ $\text{M}+\text{Na}^+$ ]: 347.2364. Found: 347.2361.

**(Z)-N,N-diethyl-5-(1-(4,4,5,5-tetramethyl-1,3,2-dioxaborolan-2-yl)ethylidene)nonanamide (4ha)**

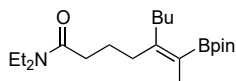

**2h** (39.0  $\mu$ L, 0.200 mmol) and **3a** (68.0  $\mu$ L, 0.600 mmol) were used to give the crude product (r.r. could not be determined due to overlapped impurities). The crude product was purified by silica gel column chromatography (eluent: hexane/AcOEt = 49/1) to give pure **4ha** (50.0 mg, 0.160 mmol) and **5ha** (6.4 mg, 0.018 mmol) as colorless oil (89%, r.r. = 9.1 : 1).

**4ha**:  $R_f$  = 0.36 (hexane/AcOEt = 2/1);  $^1\text{H}$  NMR (500 MHz,  $\text{CDCl}_3$ ):  $\delta$  3.36 (q, 2H,  $J$  = 7.1 Hz), 3.29 (q, 2H,  $J$  = 7.1 Hz), 2.32-2.28 (m, 4H), 2.15 (t, 2H,  $J$  = 8.0 Hz), 1.75-1.69 (m, 2H), 1.68 (s, 3H), 1.36-1.24 (m, 4H), 1.26 (s, 12H), 1.16 (t, 3H,  $J$  = 7.1 Hz), 1.10 (t, 3H,  $J$  = 7.1 Hz), 0.89 (t, 3H,  $J$  = 7.1 Hz);  $^{13}\text{C}$  NMR (125 MHz,  $\text{CDCl}_3$ ):  $\delta$  171.9, 155.4, 82.6, 41.9, 39.9, 35.5, 33.1, 32.4, 32.1, 24.8, 23.7, 22.9, 16.2, 14.3, 14.0, 13.1 (The carbon directly attached to the boron atom was not detected due to quadrupolar relaxation); IR (neat,  $\text{cm}^{-1}$ ): 3420, 2975, 2929, 2872, 1644, 1457, 1431, 1360, 1283, 1217, 1146, 1087, 966, 861, 754, 687, 665; HRMS (ESI):  $m/z$  calcd for  $\text{C}_{21}\text{H}_{40}\text{BNaO}_3^+$  [ $\text{M}+\text{Na}^+$ ]: 388.2993. Found: 388.2980.

**5ha**:  $R_f$  = 0.25 (hexane/AcOEt = 2/1);  $^1\text{H}$  NMR (500 MHz,  $\text{CDCl}_3$ ):  $\delta$  3.35 (q,  $J$  = 7.1 Hz, 2H), 3.28 (q,  $J$  = 7.1 Hz, 2H), 2.32-2.26 (m, 4H), 2.16 (t,  $J$  = 7.6 Hz, 2H), 1.72 (s, 3H), 1.68-1.62 (m, 2H), 1.38-1.24 (m, 4H), 1.25 (s, 12H), 1.15 (t,  $J$  = 7.1 Hz, 3H), 1.09 (t,  $J$  = 7.1 Hz, 3H), 0.89 (t,  $J$  = 7.2 Hz, 3H);  $^{13}\text{C}$  NMR (125 MHz,  $\text{CDCl}_3$ ):  $\delta$  172.5, 152.0, 82.6, 41.9, 39.8, 38.0, 33.0, 31.7, 30.6, 25.9, 24.8, 22.6, 18.7, 14.3, 14.1, 13.1 (The carbon directly attached to the boron atom was not detected due to quadrupolar relaxation); IR (neat,  $\text{cm}^{-1}$ ): 3447, 2974, 2930, 2871, 1644, 1458, 1428, 1376, 1352, 1276, 1214, 1144, 1082, 968, 862, 710; HRMS (ESI):  $m/z$  calcd for  $\text{C}_{21}\text{H}_{40}\text{BNaO}_3^+$  [ $\text{M}+\text{Na}^+$ ]: 388.2993. Found: 388.2980.

**(Z)-2-(3-((benzyloxy)methyl)hept-2-en-2-yl)-4,4,5,5-tetramethyl-1,3,2-dioxaborolane (4ia)**

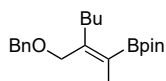

**2i** (33.0  $\mu$ L, 0.200 mmol) and **3a** (68.0  $\mu$ L, 0.600 mmol) were used to give the crude product (r.r. = >20 : 1). The crude product was purified by silica gel column chromatography (eluent: hexane/AcOEt = 49/1) to give pure **4ia** as colorless oil (59.2 mg, 0.163 mmol, 82%).

$R_f$  = 0.28 (twice with hexane/AcOEt = 30/1);  $^1\text{H}$  NMR (500 MHz,  $\text{CDCl}_3$ ):  $\delta$  7.35-7.31 (m, 4H), 7.28-7.25 (m, 1H), 4.47 (s, 2H), 4.08 (s, 2H), 2.42 (t,  $J$  = 7.8 Hz, 2H), 1.71 (s, 3H), 1.41-1.36 (m, 2H), 1.33-1.28 (m, 2H), 1.27 (s, 12H), 0.89 (t,  $J$  = 7.2 Hz, 3H);  $^{13}\text{C}$  NMR (125 MHz,  $\text{CDCl}_3$ ):  $\delta$  150.9, 138.7, 128.2, 127.6, 127.4, 82.9, 72.1, 68.5, 33.6, 32.2, 24.8, 22.9, 15.9, 14.0 (The carbon directly attached to the boron atom was not detected due to quadrupolar relaxation); IR (neat,  $\text{cm}^{-1}$ ): 3420, 2972, 2955, 2929, 2858, 1716, 1623, 1540, 1507, 1455, 1353, 1294, 1213, 1146, 1073, 965, 853, 734, 697; HRMS (ESI):  $m/z$  calcd for  $\text{C}_{21}\text{H}_{33}\text{BNaO}_3^+ [\text{M}+\text{Na}^+]$ : 367.2415. Found: 267.2401.

**(Z)-2-(4-((benzyloxy)methyl)oct-3-en-3-yl)-4,4,5,5-tetramethyl-1,3,2-dioxaborolane (4ja)**

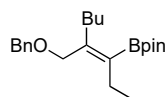

**2j** (36.0  $\mu$ L, 0.200 mmol) and **3a** (68.0  $\mu$ L, 0.600 mmol) were used to give the crude product (r.r. could not be determined due to overlapped impurities). The crude product was purified by silica gel column chromatography (eluent: hexane/AcOEt = 49/1) to give an inseparable mixture of **4ja** and **5ja** as colorless oil (50.0 mg, 0.139 mmol, 70%, r.r. = 11.9 : 1).

$R_f$  = 0.22 (twice with hexane/AcOEt = 30/1);  $^1\text{H}$  NMR (500 MHz,  $\text{CDCl}_3$ ):  $\delta$  7.37-7.24 (m, 5H, **4ja+5ja**), 4.49 (s, 2H, **5ja**), 4.46 (s, 2H, **4ja**), 4.14 (s, 2H, **5ja**), 4.07 (s, 2H, **4ja**), 2.38 (t,  $J$  = 7.8 Hz, 2H, **4ja**), 2.26 (t,  $J$  = 7.9 Hz, 2H, **5ja**), 2.16 (q,  $J$  = 7.4 Hz, 2H, **4ja**), 2.11 (q,  $J$  = 7.7 Hz, 2H, **5ja**), 1.42-1.36 (m, 2H, **4ja+5ja**), 1.34-1.21 (m, 14H, **4ja+5ja**), 0.91 (t,  $J$  = 7.4 Hz, 3H, **4ja+5ja**), 0.89 (t,  $J$  = 7.1 Hz, 3H, **4ja+5ja**);  $^{13}\text{C}$  NMR (125 MHz,  $\text{CDCl}_3$ ):  $\delta$  148.7, 138.7, 128.2, 127.6, 127.4, 82.9, 71.9, 67.8, 33.8, 32.2, 24.8, 23.6, 22.9, 15.1, 14.0 (The carbon directly attached to the boron atom was not detected due to quadrupolar relaxation); IR (neat,  $\text{cm}^{-1}$ ): 3412, 2958, 2924, 2868, 2367, 2319, 1652, 1540, 1507, 1456, 1360, 1288, 1145, 1091, 966, 857, 769; HRMS (ESI):  $m/z$  calcd for  $\text{C}_{22}\text{H}_{35}\text{BNaO}_3^+ [\text{M}+\text{Na}^+]$ : 381.2571. Found: 381.2575.

**(Z)-2-(4-(2-(benzyloxy)ethyl)oct-3-en-3-yl)-4,4,5,5-tetramethyl-1,3,2-dioxaborolane (4ka)**

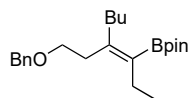

**2k** (39.0  $\mu$ L, 0.200 mmol) and **3a** (68.0  $\mu$ L, 0.600 mmol) were used to give the crude product (r.r. = 1.7 : 1). The crude product was purified by silica gel column chromatography (eluent: hexane/AcOEt = 49/1) to give a mixture of **4ka** and **5ka** as colorless oil (66.1 mg, 0.177 mmol, 89%, r.r. = 1.8 : 1). Pure **4ka** and **5ka** were isolated by GPC.

**4ka**:  $R_f$  = 0.23 (twice with hexane/AcOEt = 30/1);  $^1\text{H}$  NMR (500 MHz,  $\text{CDCl}_3$ ):  $\delta$  7.33 (d,  $J$  = 4.6 Hz, 4H), 7.28-7.25 (m, 1H), 4.50 (s, 2H), 3.46 (t,  $J$  = 8.0 Hz, 2H), 2.46 (t,  $J$  = 8.0 Hz, 2H), 2.23 (t,  $J$  = 7.9 Hz, 2H), 2.12 (q,  $J$  = 7.4 Hz, 2H), 1.38-1.25 (m, 4H), 1.26 (s, 12H), 0.91 (t,  $J$  = 7.4 Hz, 3H), 0.88 (t,  $J$  = 7.1 Hz, 3H);  $^{13}\text{C}$  NMR (125 MHz,  $\text{CDCl}_3$ ):  $\delta$  149.0, 138.6, 128.4, 127.7, 127.6, 82.9, 72.9, 69.4, 36.5, 32.6, 32.5, 24.9, 24.2, 23.0, 15.2, 14.2 (The carbon directly attached to the boron atom was not detected due to quadrupolar relaxation); IR (neat,  $\text{cm}^{-1}$ ): 3446, 2972, 2958, 2928, 2868, 1617, 1455,

1357, 1286, 1257, 1213, 1146, 1105, 968, 858, 733, 697; HRMS (ESI):  $m/z$  calcd for  $C_{23}H_{37}BNaO_3^+$   $[M+Na^+]$ : 395.2728. Found: 395.2732.

**5ka**:  $R_f$  = 0.23 (twice with hexane/AcOEt = 30/1);  $^1H$  NMR (500 MHz,  $CDCl_3$ ):  $\delta$  7.35-7.30 (m, 4H), 7.26-7.25 (m, 1H), 4.51 (s, 2H), 3.39 (t,  $J$  = 7.9 Hz, 2H), 2.47 (t,  $J$  = 7.9 Hz, 2H), 2.28 (t,  $J$  = 7.7 Hz, 2H), 2.11 (q,  $J$  = 7.6 Hz, 2H), 1.34-1.26 (m, 4H), 1.22 (s, 12H), 0.96 (t,  $J$  = 7.6 Hz, 3H), 0.89 (t,  $J$  = 7.2 Hz, 3H);  $^{13}C$  NMR (125 MHz,  $CDCl_3$ ):  $\delta$  159.0, 138.8, 128.2, 127.5, 127.3, 82.6, 72.5, 70.6, 35.1, 32.4, 31.0, 25.1, 24.7, 22.9, 14.0, 13.4 (The carbon directly attached to the boron atom was not detected due to quadrupolar relaxation); IR (neat,  $cm^{-1}$ ): 3419, 2973, 2929, 2863, 1617, 1455, 1359, 1285, 1213, 1146, 1103, 965, 853, 697; HRMS (ESI):  $m/z$  calcd for  $C_{23}H_{37}BNaO_3^+$   $[M+Na^+]$ : 395.2728. Found: 395.2732.

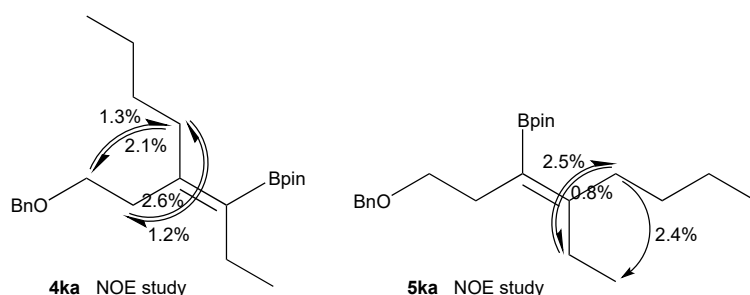

**(Z)-N,N-dibenzyl-2-butyl-3-(4,4,5,5-tetramethyl-1,3,2-dioxaborolan-2-yl)hept-2-en-1-amine (4la)**

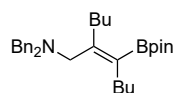

**2l** (59.0  $\mu$ L, 0.200 mmol) and **3a** (68.0  $\mu$ L, 0.600 mmol) were used to give the crude product (r.r. = >20 : 1). The crude product was purified by silica gel column chromatography (eluent: hexane/AcOEt = 19/1) to give pure **4la** as white solids (62.0 mg, 0.130 mmol, 65%).

$R_f$  = 0.45 (hexane/AcOEt = 10/1);  $^1H$  NMR (500 MHz,  $CDCl_3$ ):  $\delta$  7.37 (d,  $J$  = 7.2 Hz, 4H), 7.29 (t,  $J$  = 7.6 Hz, 4H), 7.20 (t,  $J$  = 7.3 Hz, 2H), 3.45 (s, 4H), 2.99 (s, 2H), 2.41 (t,  $J$  = 8.2 Hz, 2H), 2.19 (t,  $J$  = 7.6 Hz, 2H), 1.31-1.20 (m, 6H), 1.24 (s, 12H), 1.12-1.07 (m, 2H), 0.88 (t,  $J$  = 7.0 Hz, 3H), 0.83 (t,  $J$  = 7.3 Hz, 3H);  $^{13}C$  NMR (125 MHz,  $CDCl_3$ ):  $\delta$  150.1, 140.2, 128.7, 128.0, 126.6, 82.7, 58.4, 52.7, 33.8, 32.9, 32.1, 30.0, 24.7, 23.1, 22.7, 14.1, 14.0 (The carbon directly attached to the boron atom was not detected due to quadrupolar relaxation); IR (neat,  $cm^{-1}$ ): 3435, 3027, 2955, 2928, 2870, 2788, 1617, 1494, 1455, 1352, 1287, 1211, 1146, 1107, 1027, 966, 852, 746, 698; HRMS (ESI):  $m/z$  calcd for  $C_{31}H_{47}BNO_2^+$   $[M+H^+]$ : 476.3694. Found: 476.3694.

**(Z)-4,4,5,5-tetramethyl-2-(6-phenyldec-5-en-5-yl)-1,3,2-dioxaborolane (4ma)**

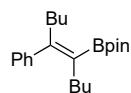

**2m** (35.0  $\mu$ L, 0.200 mmol) and **3a** (68.0  $\mu$ L, 0.600 mmol) were used to give the crude product (r.r. could not be determined due to overlapped impurities). The crude product was purified by silica gel column chromatography (eluent: hexane/AcOEt = 99/1) to give a mixture of **4ma** and **5ma** as colorless oil (60.5 mg, 0.176 mmol, 88%, r.r. = 13.8 : 1). Pure **4ma** was

isolated by PTLC (eluent: hexane/AcOEt = 20/1).

**4ma**:  $R_f$  = 0.34 (hexane/AcOEt = 30/1);  $^1\text{H}$  NMR (500 MHz,  $\text{CDCl}_3$ ):  $\delta$  7.29 (t,  $J$  = 7.4 Hz, 2H), 7.20 (t,  $J$  = 7.4 Hz, 1H), 7.05 (d,  $J$  = 7.4 Hz, 2H), 2.52 (t,  $J$  = 7.4 Hz, 2H), 1.92 (t,  $J$  = 7.6 Hz, 2H), 1.32 (s, 12H), 1.25-1.19 (m, 6H), 1.16-1.09 (m, 2H), 0.82 (t,  $J$  = 7.0 Hz, 3H), 0.73 (t,  $J$  = 7.3 Hz, 3H);  $^{13}\text{C}$  NMR (125 MHz,  $\text{CDCl}_3$ ):  $\delta$  152.9, 143.4, 128.0, 127.7, 126.0, 83.0, 38.2, 32.6, 31.8, 31.1, 24.8, 22.6, 22.5, 14.0, 13.9 (The carbon directly attached to the boron atom was not detected due to quadrupolar relaxation); IR (neat,  $\text{cm}^{-1}$ ): 2956, 2928, 2858, 1616, 1595, 1489, 1352, 1286, 1213, 1137, 1108, 966, 865, 841, 758, 702; HRMS (ESI):  $m/z$  calcd for  $\text{C}_{22}\text{H}_{35}\text{BNaO}_2^+$  [ $\text{M}+\text{Na}^+$ ]: 365.2622. Found: 365.2609.

**(E)-4,4,5,5-tetramethyl-2-(2-(3-phenylpropyl)hex-1-en-1-yl)-1,3,2-dioxaborolane (4na)**

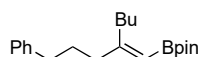

**2n** (31.0  $\mu\text{L}$ , 0.200 mmol) and **3a** (68.0  $\mu\text{L}$ , 0.600 mmol) were used to give the crude product (r.r. = 3.2 : 1). The crude product was purified by silica gel column chromatography (eluent: hexane/AcOEt = 99/1) to give a mixture of **4ma** and **5ma** as colorless oil (54.9 mg, 0.167 mmol, 84%, r.r. = 3.0 : 1). Pure **4na** and **5na** was isolated by PTLC (eluent: hexane/AcOEt = 20/1).

**4na**:  $R_f$  = 0.38 (twice with hexane/AcOEt = 30/1);  $^1\text{H}$  NMR (500 MHz,  $\text{CDCl}_3$ ):  $\delta$  7.27-7.24 (m, 2H), 7.17-7.15 (m, 3H), 5.13 (s, 1H), 2.60 (t,  $J$  = 7.7 Hz, 2H), 2.38 (t,  $J$  = 7.6 Hz, 2H), 2.14 (t,  $J$  = 7.6 Hz, 2H), 1.80-1.74 (m, 2H), 1.39-1.33 (m, 2H), 1.32-1.27 (m, 2H), 1.25 (s, 12H), 0.89 (t,  $J$  = 7.3 Hz, 3H);  $^{13}\text{C}$  NMR (125 MHz,  $\text{CDCl}_3$ ):  $\delta$  167.1, 142.4, 128.4, 128.2, 125.6, 82.5, 38.5, 35.5, 34.4, 31.7, 29.4, 24.8, 22.6, 13.9 (The carbon directly attached to the boron atom was not detected due to quadrupolar relaxation); IR (neat,  $\text{cm}^{-1}$ ): 3405, 2978, 2955, 2930, 2859, 1632, 1491, 1455, 1379, 1324, 1262, 1215, 1142, 1105, 970, 852, 756, 699, 623; HRMS (ESI):  $m/z$  calcd for  $\text{C}_{21}\text{H}_{33}\text{BNaO}_2^+$  [ $\text{M}+\text{Na}^+$ ]: 351.2466. Found: 351.2467.

**5na**:  $R_f$  = 0.57 (twice with hexane/AcOEt = 30/1);  $^1\text{H}$  NMR (500 MHz,  $\text{CDCl}_3$ ):  $\delta$  7.25 (t,  $J$  = 7.4 Hz, 2H), 7.18-7.14 (m, 3H), 6.00 (t,  $J$  = 7.4 Hz, 1H), 2.58 (t,  $J$  = 7.9 Hz, 2H), 2.33-2.28 (m, 2H), 2.14 (t,  $J$  = 7.6 Hz, 2H), 1.71-1.65 (m, 2H), 1.34-1.29 (m, 4H), 1.26 (s, 12H), 0.88 (t,  $J$  = 7.1 Hz, 3H);  $^{13}\text{C}$  NMR (125 MHz,  $\text{CDCl}_3$ ):  $\delta$  146.7, 143.0, 128.4, 128.1, 125.4, 82.7, 36.6, 35.5, 32.2, 32.0, 30.8, 24.8, 22.2, 13.9 (The carbon directly attached to the boron atom was not detected due to quadrupolar relaxation); IR (neat,  $\text{cm}^{-1}$ ): 3406, 2976, 2956, 2927, 2857, 1629, 1603, 1496, 1455, 1426, 1404, 1389, 1371, 1296, 1266, 1213, 1144, 1109, 1084, 966, 862, 747, 699; HRMS (ESI):  $m/z$  calcd for  $\text{C}_{21}\text{H}_{33}\text{BNaO}_2^+$  [ $\text{M}+\text{Na}^+$ ]: 351.2466. Found: 351.2480.

**(Z)-2-(3-(2-(benzyloxy)ethyl)-6-phenylhex-2-en-2-yl)-4,4,5,5-tetramethyl-1,3,2-dioxaborolane (4ab)**

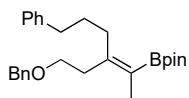

**2a** (36.0  $\mu\text{L}$ , 0.200 mmol) and **3b** (96.0  $\mu\text{L}$ , 0.600 mmol) were used to give the crude product (r.r. = 9.5 : 1). The crude product was purified by silica gel column chromatography (eluent: hexane/AcOEt = 49/1) to give an inseparable mixture of **4ab** and **5ab** as colorless oil (72.3 mg, 0.172 mmol, 86%, r.r. = 10.4 : 1).

$R_f = 0.21$  (twice with hexane/AcOEt = 30/1);  $^1\text{H}$  NMR (500 MHz,  $\text{CDCl}_3$ ):  $\delta$  7.34-7.24 (m, 7H, **4ab+5ab**), 7.17-7.14 (m, 3H, **4ab+5ab**), 4.50 (s, 2H, **5ab**), 4.48 (s, 2H, **4ab**), 3.46 (t,  $J = 7.9$  Hz, 2H, **4ab**), 3.38 (t,  $J = 7.7$  Hz, 2H, **5ab**), 2.58 (t,  $J = 7.8$  Hz, 2H, **4ab+5ab**), 2.48 (t,  $J = 7.9$  Hz, 2H, **4ab+5ab**), 2.36 (t,  $J = 7.9$  Hz, 2H, **4ab+5ab**), 1.74-1.66 (m, 2H, **4ab+5ab**), 1.69 (s, 3H, **4ab+5ab**), 1.23 (s, 12H, **4ab**), 1.19 (s, 12H, **5ab**);  $^{13}\text{C}$  NMR (125 MHz,  $\text{CDCl}_3$ ):  $\delta$  151.1, 142.7, 138.4, 128.3, 128.3, 128.2, 127.6, 127.4, 125.5, 82.8, 72.7, 68.3, 36.4, 36.2, 33.2, 31.7, 24.7, 24.7, 16.3 (The carbon directly attached to the boron atom was not detected due to quadrupolar relaxation); IR (neat,  $\text{cm}^{-1}$ ): 3446, 3025, 2976, 2930, 2857, 1620, 1496, 1454, 1358, 1288, 1214, 1143, 1088, 1028, 965, 856, 750, 698, 670; HRMS (ESI):  $m/z$  calcd for  $\text{C}_{27}\text{H}_{37}\text{BNaO}_3^+$  [ $\text{M}+\text{Na}^+$ ]: 443.2728. Found: 443.2736.

**(Z)-2-(3-(2-(benzyloxy)ethyl)octa-2,7-dien-2-yl)-4,4,5,5-tetramethyl-1,3,2-dioxaborolane (4ac)**

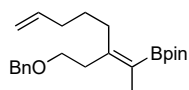

**2a** (36.0  $\mu\text{L}$ , 0.200 mmol) and **3c** (74.0  $\mu\text{L}$ , 0.600 mmol) were used to give the crude product (r.r. = 11.7 : 1). The crude product was purified by silica gel column chromatography (eluent: hexane/AcOEt = 49/1) to give an inseparable mixture of **4ac** and **5ac** as colorless oil (54.6 mg, 0.147 mmol, 74%, r.r. = 11.2 : 1).

$R_f = 0.17$  (twice with hexane/AcOEt = 30/1);  $^1\text{H}$  NMR (500 MHz,  $\text{CDCl}_3$ ):  $\delta$  7.35-7.25 (m, 5H, **4ac+5ac**), 5.86-5.78 (m, 1H, **4ac+5ac**), 5.01-4.90 (m, 2H, **4ac+5ac**), 4.50 (s, 2H, **4ac+5ac**), 3.47 (t,  $J = 7.9$  Hz, 2H, **4ac**), 3.39 (t,  $J = 7.8$  Hz, 2H, **5ac**), 2.48 (t,  $J = 7.9$  Hz, 2H, **4ac+5ac**), 2.30 (t,  $J = 8.0$  Hz, 2H, **4ac+5ac**), 2.05-2.00 (m, 2H, **4ac+5ac**), 1.74 (s, 3H, **5ac**), 1.69 (s, 3H, **4ac**), 1.49-1.43 (m, 2H, **4ac+5ac**), 1.25 (s, 12H, **4ac**), 1.22 (s, 12H, **5ac**);  $^{13}\text{C}$  NMR (125 MHz,  $\text{CDCl}_3$ ):  $\delta$  151.2, 139.0, 138.4, 128.3, 127.6, 127.5, 114.1, 82.8, 72.8, 68.4, 36.1, 33.9, 33.2, 29.3, 24.8, 24.7, 16.3 (The carbon directly attached to the boron atom was not detected due to quadrupolar relaxation); IR (neat,  $\text{cm}^{-1}$ ): 3066, 2977, 2929, 2860, 1620, 1495, 1358, 1293, 1215, 1145, 1089, 1027, 993, 965, 910, 855, 758, 697, 667; HRMS (ESI):  $m/z$  calcd for  $\text{C}_{23}\text{H}_{35}\text{BNaO}_3^+$  [ $\text{M}+\text{Na}^+$ ]: 393.2571. Found: 393.2568.

**(Z)-ethyl 5-(2-(benzyloxy)ethyl)-6-(4,4,5,5-tetramethyl-1,3,2-dioxaborolan-2-yl)hept-5-enoate (4ad)**

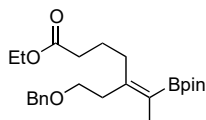

**2a** (36.0  $\mu\text{L}$ , 0.200 mmol) and **3d** (89.0  $\mu\text{L}$ , 0.600 mmol) were used to give the crude product (r.r. = 9.4 : 1). The crude product was purified by silica gel column chromatography (eluent: hexane/AcOEt = 49/1→19/1) to give an inseparable mixture of **4ad** and **5ad** as colorless oil (66.9 mg, 0.161 mmol, 80%, r.r. = 10.7 : 1).

$R_f = 0.27$  (twice with hexane/AcOEt = 30/1);  $^1\text{H}$  NMR (500 MHz,  $\text{CDCl}_3$ ):  $\delta$  7.35-7.24 (m, 5H, **4ad+5ad**), 4.50 (s, 2H, **4ad+5ad**), 4.10 (q,  $J = 7.1$  Hz, 2H, **4ad+5ad**), 3.48 (t,  $J = 7.7$  Hz, 2H, **4ad**), 3.38 (t,  $J = 7.7$  Hz, 2H, **5ad**), 2.49 (t,  $J = 7.7$  Hz, 2H, **4ad+5ad**), 2.26 (t,  $J = 7.7$  Hz, 2H, **4ad+5ad**), 1.75-1.66 (m, 2H, **4ad+5ad**), 1.69 (s, 3H, **4ad+5ad**), 1.26-1.21 (m, 3H, **4ad+5ad**), 1.25 (s, 12H, **4ad+5ad**);  $^{13}\text{C}$  NMR (125 MHz,  $\text{CDCl}_3$ ):  $\delta$  173.8, 150.7, 138.4, 128.3, 127.5, 127.4, 82.8, 72.8,

68.3, 60.1, 35.5, 34.2, 33.1, 25.0, 24.8, 24.7, 16.4, 14.2 (The carbon directly attached to the boron atom was not detected due to quadrupolar relaxation); IR (neat,  $\text{cm}^{-1}$ ): 3446, 2977, 2933, 2863, 1734, 1621, 1455, 1357, 1294, 1247, 1213, 1144, 1090, 1028, 965, 856, 737, 697, 671; HRMS (ESI):  $m/z$  calcd for  $\text{C}_{24}\text{H}_{37}\text{BNaO}_5^+$  [ $\text{M}+\text{Na}^+$ ]: 439.2626. Found: 439.2631.

**(Z)-2-(5-(benzyloxy)-3-(cyclopropylmethyl)pent-2-en-2-yl)-4,4,5,5-tetramethyl-1,3,2-dioxaborolane (4ae)**

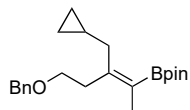

**2a** (36.0  $\mu\text{L}$ , 0.200 mmol) and **3e** (63.0  $\mu\text{L}$ , 0.600 mmol) were used to give the crude product (r.r. = 12.1 : 1). The crude product was purified by silica gel column chromatography (eluent: hexane/AcOEt = 49/1) to give an inseparable mixture of **4ae** and **5ae** as colorless oil (56.0 mg, 0.172 mmol, 86%, r.r. = 11.2 : 1).

$R_f$  = 0.13 (twice with hexane/AcOEt = 30/1);  $^1\text{H}$  NMR (500 MHz,  $\text{CDCl}_3$ ):  $\delta$  7.36-7.25 (m, 5H, **4ae+5ae**), 4.51 (s, 2H, **4ae+5ae**), 3.51 (t, 2H,  $J$  = 8.0 Hz, **4ae**), 3.40 (t,  $J$  = 7.7 Hz, 2H, **5ae**), 2.59 (t,  $J$  = 8.0 Hz, 2H, **4ae**), 2.50 (t,  $J$  = 7.7 Hz, 2H, **5ae**), 2.25 (d,  $J$  = 6.5 Hz, 2H, **4ae+5ae**), 1.82 (s, 2H, **5ae**), 1.71 (s, 2H, **4ae**), 1.24 (s, 12H, **4ae**), 1.21 (s, 12H, **5ae**), 0.82-0.75 (m, 1H, **4ae+5ae**), 0.40-0.35 (m, 2H, **4ae+5ae**), 0.14-0.11 (m, 2H, **4ae+5ae**);  $^{13}\text{C}$  NMR (125 MHz,  $\text{CDCl}_3$ ):  $\delta$  138.5, 128.3, 127.6, 127.4, 82.8, 72.7, 68.3, 40.5, 33.1, 24.7, 16.3, 10.8, 4.4 (The carbon directly attached to the boron atom was not detected due to quadrupolar relaxation); IR (neat,  $\text{cm}^{-1}$ ): 3396, 3073, 2977, 2929, 2858, 1621, 1455, 1355, 1290, 1214, 1147, 1087, 1016, 966, 854, 736, 697; HRMS (ESI):  $m/z$  calcd for  $\text{C}_{22}\text{H}_{33}\text{BNaO}_3^+$  [ $\text{M}+\text{Na}^+$ ]: 379.2415. Found: 379.2422.

**(Z)-2-(5-(benzyloxy)-3-methylpent-2-en-2-yl)-4,4,5,5-tetramethyl-1,3,2-dioxaborolane (4af)**

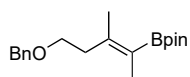

**2a** (36.0  $\mu\text{L}$ , 0.200 mmol), **3f** (2.0 M in DMF, 0.300 mL, 0.600 mmol) and DMF (0.70 mL) were used. **3f** was added dropwise over 1 h at ambient temperature. The resulting mixture was stirred for another 3 h to give the crude product (r.r. = 14.1 : 1). The crude product was purified by silica gel column chromatography (eluent: hexane/AcOEt = 49/1) to give an inseparable mixture of **4af** and **5af** as sticky white solids (52.4 mg, 0.166 mmol, 83%, r.r. = 14.5 : 1).

$R_f$  = 0.35 (twice with hexane/AcOEt = 30/1);  $^1\text{H}$  NMR (500 MHz,  $\text{CDCl}_3$ ):  $\delta$  7.35-7.25 (m, 5H, **4af+5af**), 4.51 (s, 2H, **4af+5af**), 3.51 (t,  $J$  = 7.6 Hz, 2H, **4af**), 3.39 (t,  $J$  = 7.8 Hz, 2H, **5af**), 2.48 (t,  $J$  = 7.6 Hz, 2H, **4af+5af**), 1.97 (d,  $J$  = 1.5 Hz, 3H, **4af+5af**), 1.75 (s, 3H, **5af**), 1.69 (s, 3H, **4af**), 1.26 (s, 12H, **4af**), 1.23 (s, 12H, **5af**);  $^{13}\text{C}$  NMR (125 MHz,  $\text{CDCl}_3$ ):  $\delta$  147.4, 138.5, 128.3, 127.6, 127.4, 82.8, 72.8, 68.1, 35.3, 24.8, 24.7, 22.8, 16.2 (The carbon directly attached to the boron atom was not detected due to quadrupolar relaxation); IR (neat,  $\text{cm}^{-1}$ ): 3445, 2977, 2929, 2863, 1733, 1626, 1455, 1358, 1292, 1214, 1147, 1088, 965, 854, 735, 697, 685, 635; HRMS (ESI):  $m/z$  calcd for  $\text{C}_{19}\text{H}_{29}\text{BNaO}_3^+$  [ $\text{M}+\text{Na}^+$ ]: 339.2102. Found: 339.2115.



**(Z)-2-(3-benzyl-5-(benzyloxy)pent-2-en-2-yl)-4,4,5,5-tetramethyl-1,3,2-dioxaborolane (4ag)**

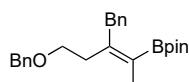

**2a** (36.0  $\mu$ L, 0.200 mmol) and **3g** (71.0  $\mu$ L, 0.600 mmol) were used to give the crude product (r.r. = 12.8 : 1). The crude product was purified by silica gel column chromatography (eluent: hexane/AcOEt = 49/1 $\rightarrow$ 19/1) to give an inseparable mixture of **4ag** and **5ag** as colorless oil (56.7 mg, 0.144 mmol, 72%, r.r. = 12.6 : 1).

$R_f$  = 0.15 (twice with hexane/AcOEt = 30/1);  $^1\text{H}$  NMR (500 MHz,  $\text{CDCl}_3$ ):  $\delta$  7.34-7.14 (m, 10 H, **4ag**+**5ag**), 4.51 (s, 2H, **5ag**), 4.41 (s, 2H, **4ag**), 3.72 (s, 2H, **4ag**), 3.70 (s, 2H, **5ag**), 3.45 (t,  $J$  = 7.4 Hz, 2H, **5ag**), 3.33 (t,  $J$  = 7.7 Hz, 2H, **4ag**), 2.54 (t,  $J$  = 7.4 Hz, 2H, **5ag**), 2.38 (t,  $J$  = 7.7 Hz, 2H, **4ag**), 1.76 (s, 3H, **4ag**), 1.63 (s, 3H, **5ag**), 1.26 (s, 12H, **4ag**), 1.23 (s, 12H, **5ag**);  $^{13}\text{C}$  NMR (125 MHz,  $\text{CDCl}_3$ ):  $\delta$  149.5, 140.7, 138.5, 129.0, 128.3, 128.1, 127.5, 127.4, 125.7, 83.0, 72.6, 68.2, 42.3, 32.5, 24.7, 16.5 (The carbon directly attached to the boron atom was not detected due to quadrupolar relaxation); IR (neat,  $\text{cm}^{-1}$ ): 3421, 3024, 2976, 2929, 2858, 1623, 1455, 1353, 1301, 1214, 1143, 1081, 966, 854, 754, 699; HRMS (ESI):  $m/z$  calcd for  $\text{C}_{25}\text{H}_{33}\text{BNaO}_3^+$  [ $\text{M}+\text{Na}^+$ ]: 415.2415. Found: 415.2404.

**(E)-ethyl 3-(2-(benzyloxy)ethyl)-4-(4,4,5,5-tetramethyl-1,3,2-dioxaborolan-2-yl)pent-3-enoate (4ah)**

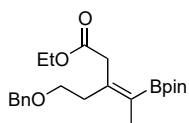

**2a** (36.0  $\mu$ L, 0.200 mmol) and **3h** (66.0  $\mu$ L, 0.600 mmol) were used to give the crude product (r.r. could not be determined due to overlapped impurities). The crude product was purified by silica gel column chromatography (eluent: hexane/AcOEt = 19/1 $\rightarrow$ 9/1) and GPC to give an inseparable mixture of **4ah** and **5ah** as colorless oil (33.4 mg, 0.0860 mmol, 43%, r.r. = 13.0 : 1).

$R_f$  = 0.22 (twice with hexane/AcOEt = 30/1);  $^1\text{H}$  NMR (500 MHz,  $\text{CDCl}_3$ ):  $\delta$  7.35-7.24 (m, 5H, **4ah**+**5ah**), 4.51 (s, 2H, **5ah**), 4.49 (s, 2H, **4ah**), 4.08 (q,  $J$  = 7.1 Hz, 2H, **4ah**+**5ah**), 3.51 (s, 2H, **4ah**+**5ah**), 3.51 (t,  $J$  = 7.3 Hz, 2H, **4ah**), 3.42 (t,  $J$  = 7.6 Hz, 2H, **5ah**), 2.56 (t,  $J$  = 7.3 Hz, 2H, **4ah**+**5ah**), 1.83 (s, 3H, **5ah**), 1.76 (s, 3H, **4ah**), 1.26-1.21 (m, 3H, **4ah**+**5ah**), 1.24 (s, 12H, **4ah**+**5ah**);  $^{13}\text{C}$  NMR (125 MHz,  $\text{CDCl}_3$ ):  $\delta$  172.3, 144.0, 138.4, 128.3, 127.5, 127.4, 83.0, 72.8, 68.1, 60.2, 41.1, 34.1, 24.7, 16.5, 14.2 (The carbon directly attached to the boron atom was not detected due to quadrupolar relaxation); IR (neat,  $\text{cm}^{-1}$ ): 3450, 2979, 2933, 2858, 1731, 1628, 1455, 1359, 1301, 1215, 1143, 1094, 1030, 966, 853, 755, 698, 668; HRMS (ESI):  $m/z$  calcd for  $\text{C}_{22}\text{H}_{33}\text{BNaO}_5^+$  [ $\text{M}+\text{Na}^+$ ]: 411.2313. Found: 411.2308.

**(Z)-2-(3-(2-(benzyloxy)ethyl)-5-methylhex-2-en-2-yl)-4,4,5,5-tetramethyl-1,3,2-dioxaborolane (4ai)**

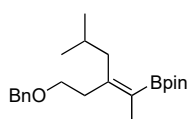

**2a** (36.0  $\mu$ L, 0.200 mmol) and **3i** (69.0  $\mu$ L, 0.600 mmol) were used to give the crude product (r.r. = 5.4 : 1). The crude

product was purified by silica gel column chromatography (eluent: hexane/AcOEt = 49/1) to give an inseparable mixture of **4ai** and **5ai** as colorless oil (21.7 mg, 0.0606 mmol, 30%, r.r. = 4.8 : 1).

$R_f$  = 0.27 (twice with hexane/AcOEt = 30/1);  $^1\text{H}$  NMR (500 MHz,  $\text{CDCl}_3$ ):  $\delta$  7.35-7.25 (m, 5H, **4ai**+**5ai**), 4.51 (s, 2H, **5ai**), 4.50 (s, 2H, **4ai**), 3.46 (t,  $J$  = 8.0 Hz, 2H, **4ai**), 3.40 (t,  $J$  = 7.8 Hz, 2H, **5ai**), 2.47 (t,  $J$  = 8.0 Hz, 2H, **4ai**+**5ai**), 2.24 (d,  $J$  = 7.3 Hz, 2H, **5ai**), 2.21 (d,  $J$  = 7.2 Hz, 2H, **4ai**), 1.73-1.69 (m, 1H, **4ai**+**5ai**), 1.72 (s, 3H, **5ai**), 1.71 (s, 3H, **4ai**), 1.25 (s, 12H, **4ai**), 1.22 (s, 12H, **5ai**), 0.84 (d,  $J$  = 6.5 Hz, 6H, **4ai**), 0.83 (d,  $J$  = 6.5 Hz, 6H, **5ai**);  $^{13}\text{C}$  NMR (125 MHz,  $\text{CDCl}_3$ ):  $\delta$  149.9, 138.5, 128.3, 128.2, 127.6, 127.5, 127.4, 82.7, 72.7, 68.3, 45.0, 33.2, 27.9, 24.8, 24.7, 22.5, 16.4 (The carbon directly attached to the boron atom was not detected due to quadrupolar relaxation); IR (neat,  $\text{cm}^{-1}$ ): 3420, 2972, 2955, 2929, 2866, 1619, 1455, 1356, 1294, 1215, 1147, 1130, 1087, 966, 855, 755, 697, 668; HRMS (ESI):  $m/z$  calcd for  $\text{C}_{22}\text{H}_{35}\text{BNaO}_3^+$  [ $\text{M}+\text{Na}^+$ ]: 381.2571. Found: 381.2565.

## 6. Applications

### 6.1 Suzuki-Miyaura Coupling with PhI

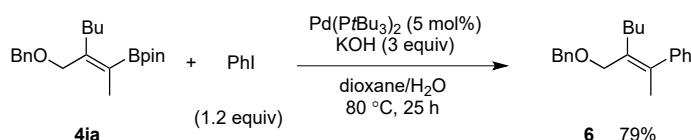

#### (*E*)-3-(benzyloxy)methyl-2-phenyl-2-heptene (**6**)

To a dried screw cap tube were added **4ia** (27.6 mg, 0.0802 mmol), iodobenzene (10.7  $\mu\text{L}$ , 0.0960 mmol),  $(t\text{Bu}_3\text{P})_2\text{Pd}$  (2.0 mg, 0.0040 mmol), KOH (13.5 mg, 0.240 mmol), 1,4-dioxane (0.16 mL) and water (0.040 mL). After the tube was sealed with a cap, the resulting mixture was stirred at 80  $^\circ\text{C}$  for 25 h. The reaction was quenched with water, and extracted three times with hexane/AcOEt = 4/1. After filtration over  $\text{Na}_2\text{SO}_4$  and evaporation, the residue was purified by silica gel column chromatography (eluent: hexane/AcOEt = 99/1) to give **6** as NMR-pure brown oil (18.6 mg, 0.0632 mmol, 79%). Colorless oil **6** was obtained after GPC.

$R_f$  = 0.30 (twice with hexane/AcOEt = 30/1);  $^1\text{H}$  NMR (500 MHz,  $\text{CDCl}_3$ ):  $\delta$  7.40-7.34 (m, 4H), 7.32- 7.28 (m, 3H), 7.21 (t,  $J$  = 7.1 Hz, 1H), 7.11 (d,  $J$  = 7.1 Hz, 2H), 4.56 (s, 2H), 4.15 (s, 2H), 1.98 (t,  $J$  = 7.7 Hz, 2H), 1.98 (s, 3H), 1.32-1.25 (m, 2H), 1.16-1.08 (m, 2H), 0.74 (t,  $J$  = 7.3 Hz, 3H);  $^{13}\text{C}$  NMR (125 MHz,  $\text{CDCl}_3$ ):  $\delta$  144.6, 138.6, 136.3, 132.5, 128.3, 128.0, 127.8, 127.8, 127.5, 126.1, 72.2, 68.3, 31.4, 30.9, 22.6, 21.1, 13.8; IR (neat,  $\text{cm}^{-1}$ ): 3420, 2950, 2925, 2858, 2358, 1646, 1455, 1361, 1214, 1087, 1071, 1026, 764, 700, 635; HRMS (ESI):  $m/z$  calcd for  $\text{C}_{21}\text{H}_{26}\text{NaO}^+$  [ $\text{M}+\text{Na}^+$ ]: 317.1876. Found: 317.1878.

### 6.2 Suzuki-Miyaura Coupling with $\text{C}_{12}\text{H}_{25}\text{Br}$

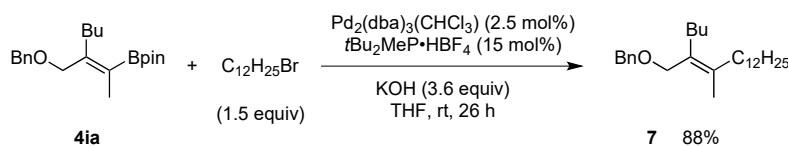

#### (*E*)-5-(benzyloxy)methyl-6-methyl-5-octadecene (**7**)

To a dried screw cap tube were added **4ia** (26.2 mg, 0.0760 mmol),  $\text{Pd}_2(\text{dba})_3\cdot\text{CHCl}_3$  (2.0 mg, 0.0019 mmol),

*t*Bu<sub>2</sub>MeP•HBF<sub>4</sub> (2.8 mg, 0.011 mmol), KOH (15.4 mg, 0.274 mmol) and THF (0.19 mL). The resulting mixture was stirred for 20 min, before 1-bromododecane (27.0 µL, 0.114 mmol) was added. After the tube was sealed with a cap, the resulting mixture was stirred at ambient temperature for 26 h. The reaction mixture was filtrated through a short pad of silica gel (eluted with hexane/AcOEt = 10/1). After evaporation, the residue was purified by silica gel column chromatography (eluent: hexane/AcOEt = 99/1→49/1) to give **7** as yellow oil (26.0 mg, 0.0672 mmol, 88%).

*R*<sub>f</sub> = 0.44 (twice with hexane/AcOEt = 30/1); <sup>1</sup>H NMR (500 MHz, CDCl<sub>3</sub>): δ 7.37-7.31 (m, 4H), 7.29-7.25 (m, 1H), 4.45 (s, 2H), 3.98 (s, 2H), 2.11 (t, *J* = 7.7 Hz, 2H), 2.03 (t, *J* = 7.7 Hz, 2H), 1.67 (s, 3H), 1.55-1.25 (m, 24H), 0.89 (t, *J* = 6.8 Hz, 3H), 0.87 (t, *J* = 6.8 Hz, 3H); <sup>13</sup>C NMR (125 MHz, CDCl<sub>3</sub>): δ 138.8, 135.2, 129.8, 128.2, 127.8, 127.4, 71.7, 69.1, 34.4, 31.9, 31.3, 30.3, 29.8, 29.7, 29.6, 29.6, 29.6, 29.6, 29.3, 28.3, 23.0, 22.7, 18.0, 14.1, 14.0; IR (neat, cm<sup>-1</sup>): 3406, 2955, 2924, 2854, 1495, 1455, 1376, 1355, 1214, 1087, 1069, 1027, 938, 732, 696; HRMS (ESI): *m/z* calcd for C<sub>27</sub>H<sub>46</sub>ONa<sup>+</sup> [M+Na<sup>+</sup>]: 409.3441. Found: 409.3449.

## 7. References

1. Hasse, M. J.; Butts, C. P.; Willis, C. L.; Aggarwal, V. K. *Angew. Chem. Int. Ed.* **2012**, *51*, 12444.
2. Alonso, F.; Osante, I.; Yus, M. *Tetrahedron* **2007**, *63*, 93.
3. Guy, A.; Oger, C.; Heppekausen, J.; Signorini, C.; Felice, C. D.; Fürstner, A.; Durand, T.; Galano, J.-M. *Chem. Eur. J.* **2014**, *20*, 6374.
4. Hosoya, T.; Wakao, M.; Kondo, Y.; Doi, H.; Suzuki, M. *Org. Biomol. Chem.* **2004**, *2*, 24.
5. Fischer, M.; Schemölzer, C.; Nowikow, C.; Schmid, W. *Eur. J. Org. Chem.* **2011**, 1645.
6. Kabalka, G. W.; Venkataiah, B.; Dong, G. *Tetrahedron Lett.* **2004**, *45*, 729.
7. Lin, Y. A.; Chalker, J. M.; Floyd, N.; Bernardes, G. J. L.; Davis, B. G.; *J. Am. Chem. Soc.* **2008**, *130*, 9642.
8. Kucharski, T. J.; Ferralis, N.; Kolpak, A. M.; Zheng, J. O.; Nocera, D. G.; Grossman, J. C. *Nature Chem.* **2014**, *6*, 441.
9. Tennyson, A. G.; Lynch, V. M.; Bielawski, C. W. *J. Am. Chem. Soc.* **2010**, *132*, 9420.

C:\Documents and Settings\user1\My Documents\Ever20160430001-1-1.als

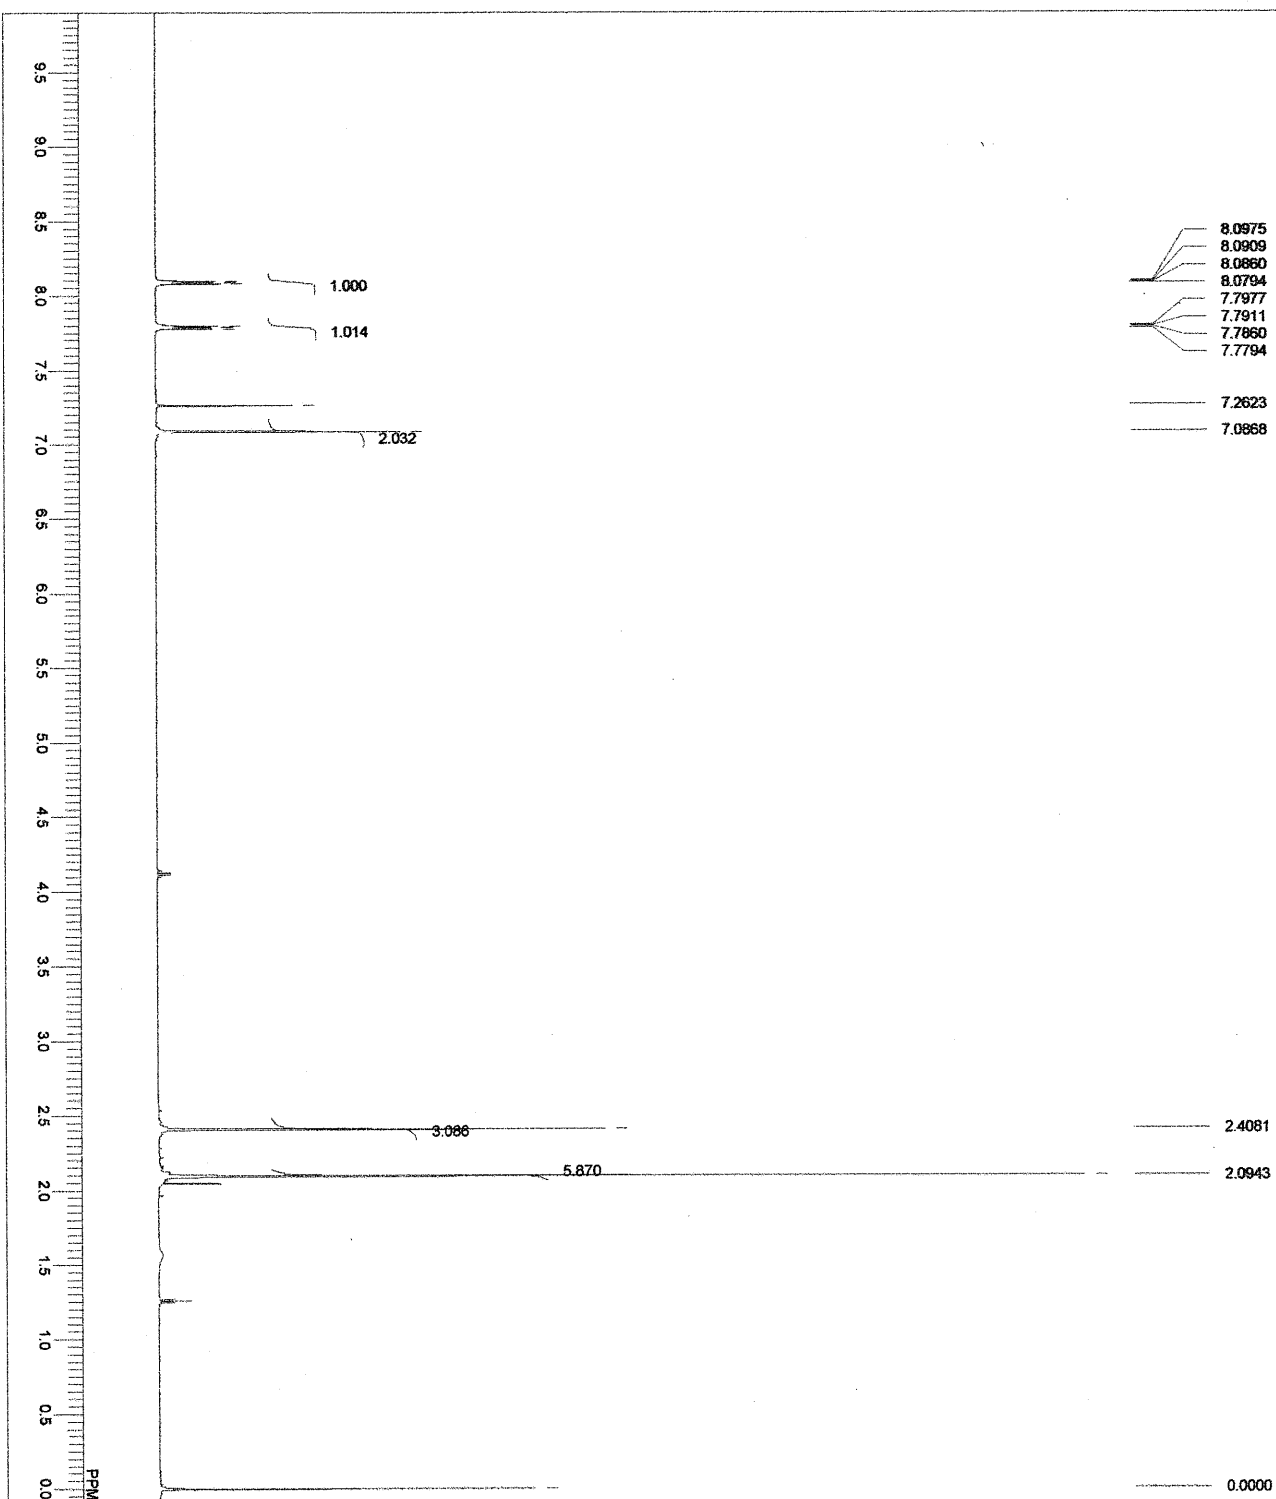

D:\Ever20160430001-1-1.als  
 COUNT NQIMesCuCl  
 DATIM 2016-04-30 13:51:21  
 1H  
 EXMUC  
 EXMUCD  
 OFRQ 500.16 MHz  
 OFRQ 2.41 KHz  
 OFRQ 6.01 Hz  
 POINT 52428  
 FREQU 7507.51 Hz  
 SCANS 8  
 ACQTM 1.7459 sec  
 PD 5.0000 sec  
 PW1 5.55 usec  
 IRNUC 1H  
 CTMPC 21.2 c  
 SLVMT CDCl3  
 EXREF 0.00 ppm  
 BF 0.12 Hz  
 RGAIN 30

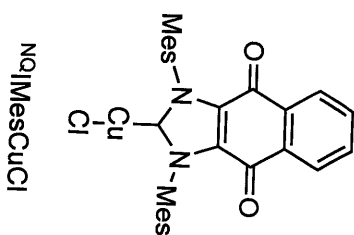

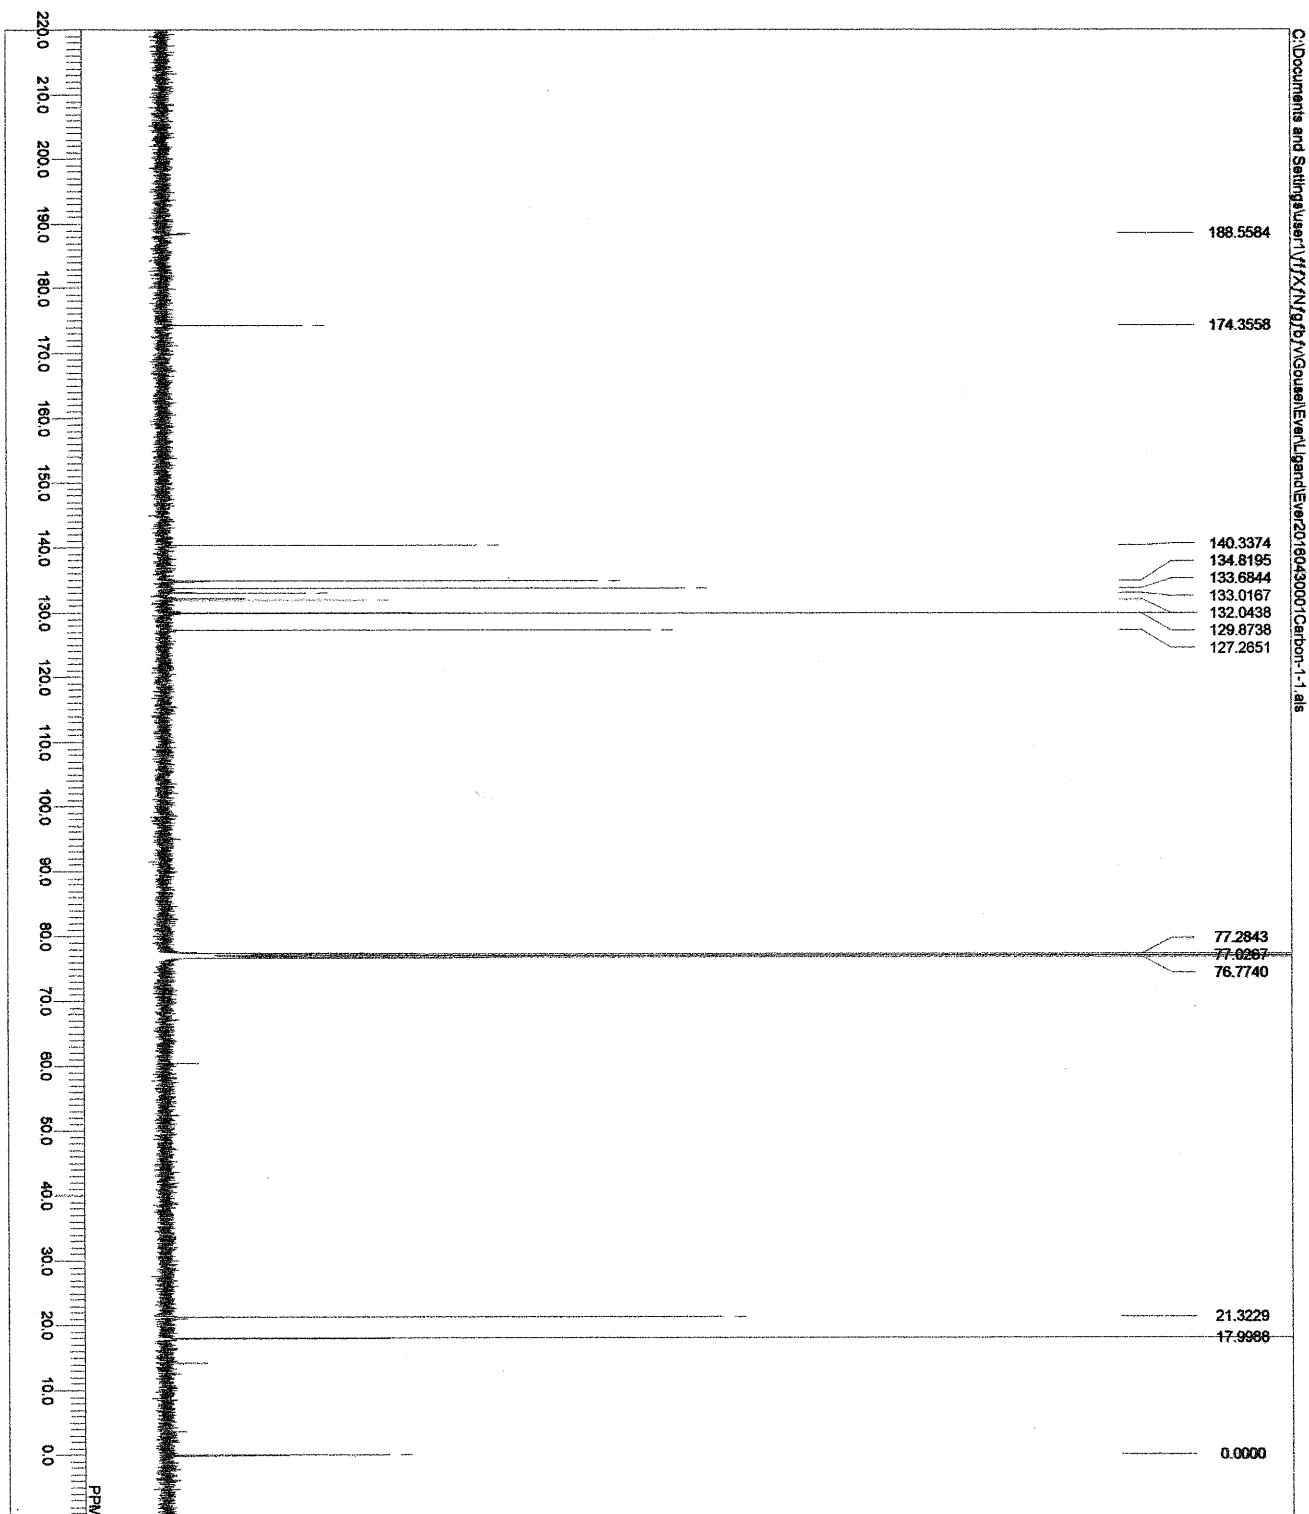

DFILE Ever20160430001\Carbon-1-1.a1s  
 COMNT NQIMesCuCl Carbon  
 DATIM 2016-04-30 13:52:58  
 EXMOD 13C  
 EXMUC carbon.jpg  
 OFFRQ 125.77 MHz  
 OBSET 7.87 KHz  
 OFPIN 4.21 Hz  
 POINT 65535  
 FREQU 39308.18 Hz  
 SCANS 2566  
 ACQTM 0.8336 sec  
 PD 2.0000 sec  
 PW1 3.40 usec  
 IRNUC 1H  
 CTEMP 21.7 c  
 SLVNT CDCl3  
 EXREF 0.00 ppm  
 BF 1.02 Hz  
 RGAIN 60

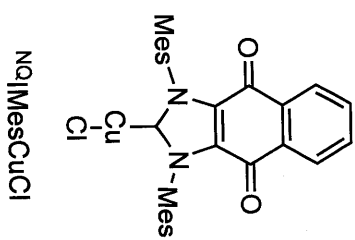

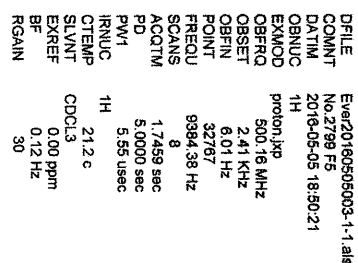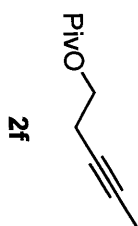

C:\Documents and Settings\user1\My Documents\NMR\Goussell\EverAlky\poreation\Ever2016050502Carbon-1-1.a1e

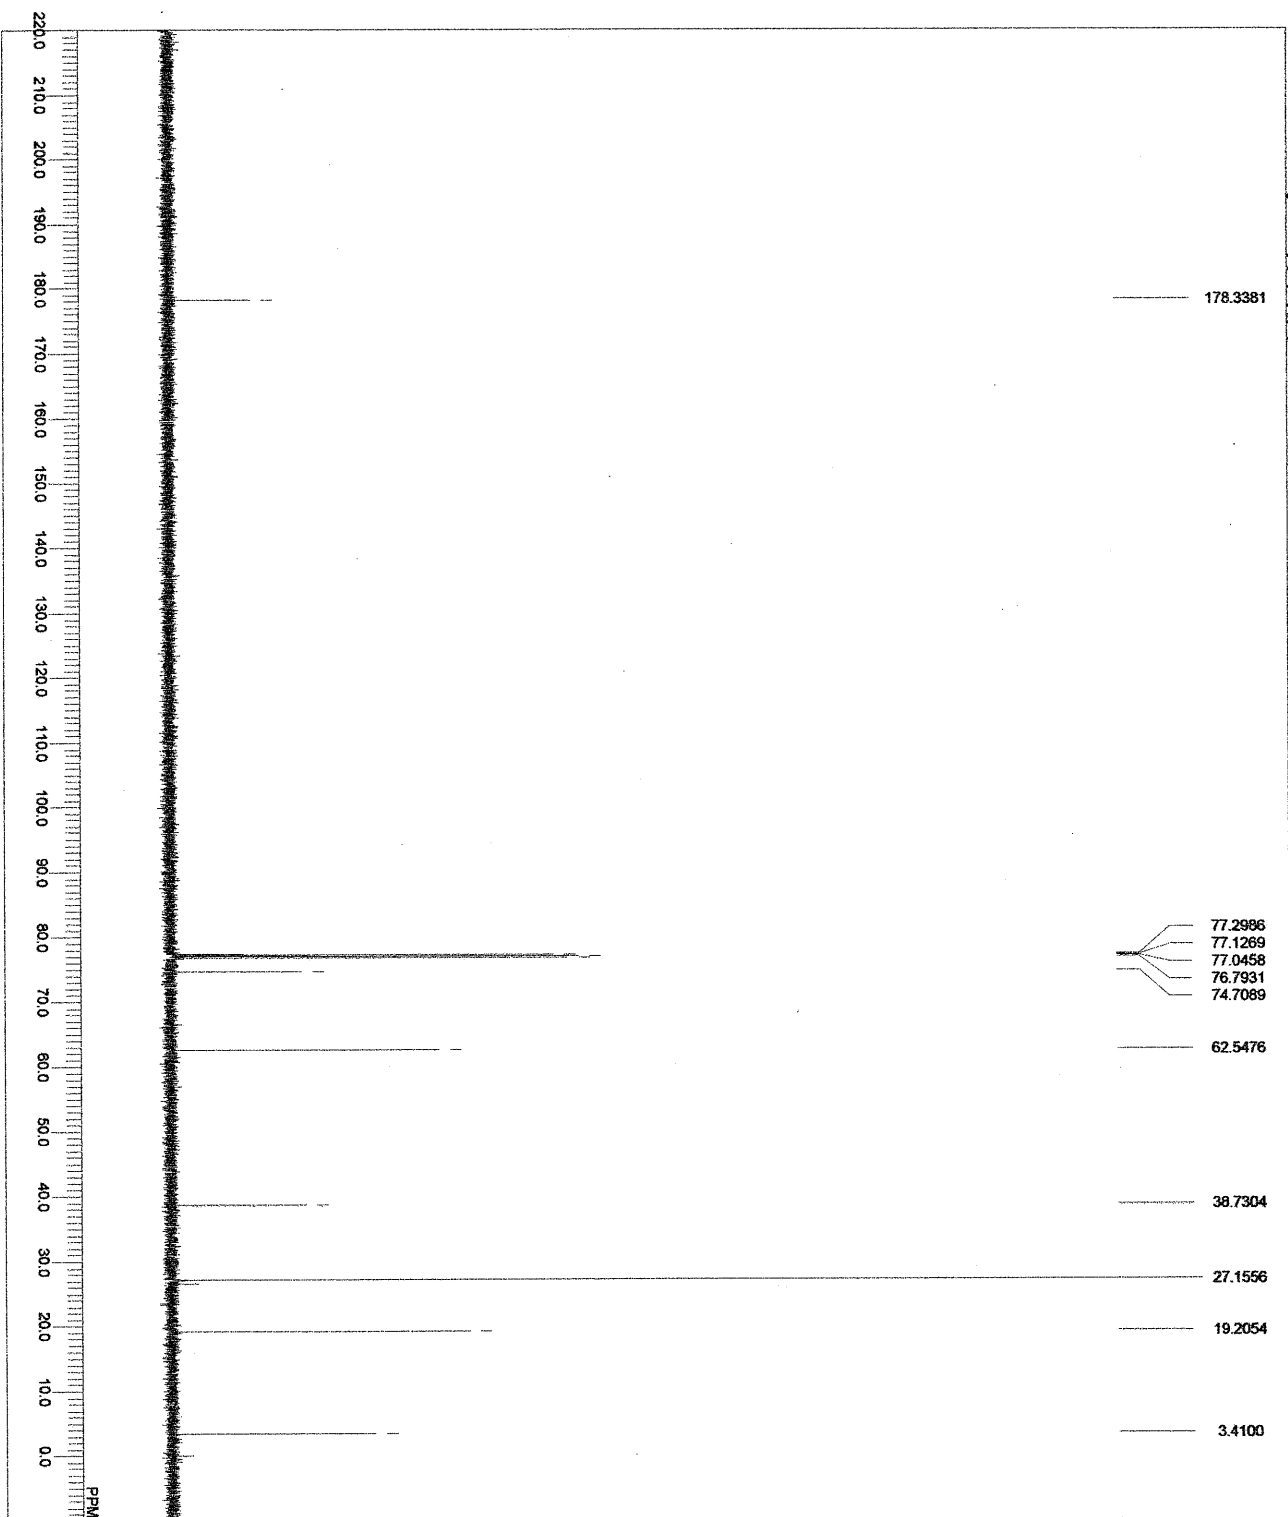

D:\FILE Ever2016050502Carbon-1-1.a1e  
 COMNT No.2799 F5 Carbon  
 DATM 2016-05-05 16:04:29  
 OBNUC 13C  
 EXMOD carbon-13p  
 OBRRO 125.27 MHz  
 OBRSE 7.87 KHz  
 OBRIN 4.21 Hz  
 POINT 65535  
 FRECU 39308.18 Hz  
 SCANS 57  
 ACQTM 0.8338 sec  
 PD 2.0000 sec  
 PW1 3.40 usec  
 IRNUC 1H  
 CTEMP 21.5 c  
 SLVNT CDCl3  
 EXREF 0.00 ppm  
 BR 0.62 Hz  
 RGAIN 50

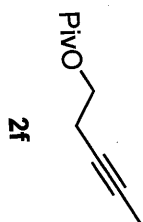

C:\Documents and Settings\user1\My Documents\Ghouse\Even\Allylboration\Even20160326002-1-1.a16

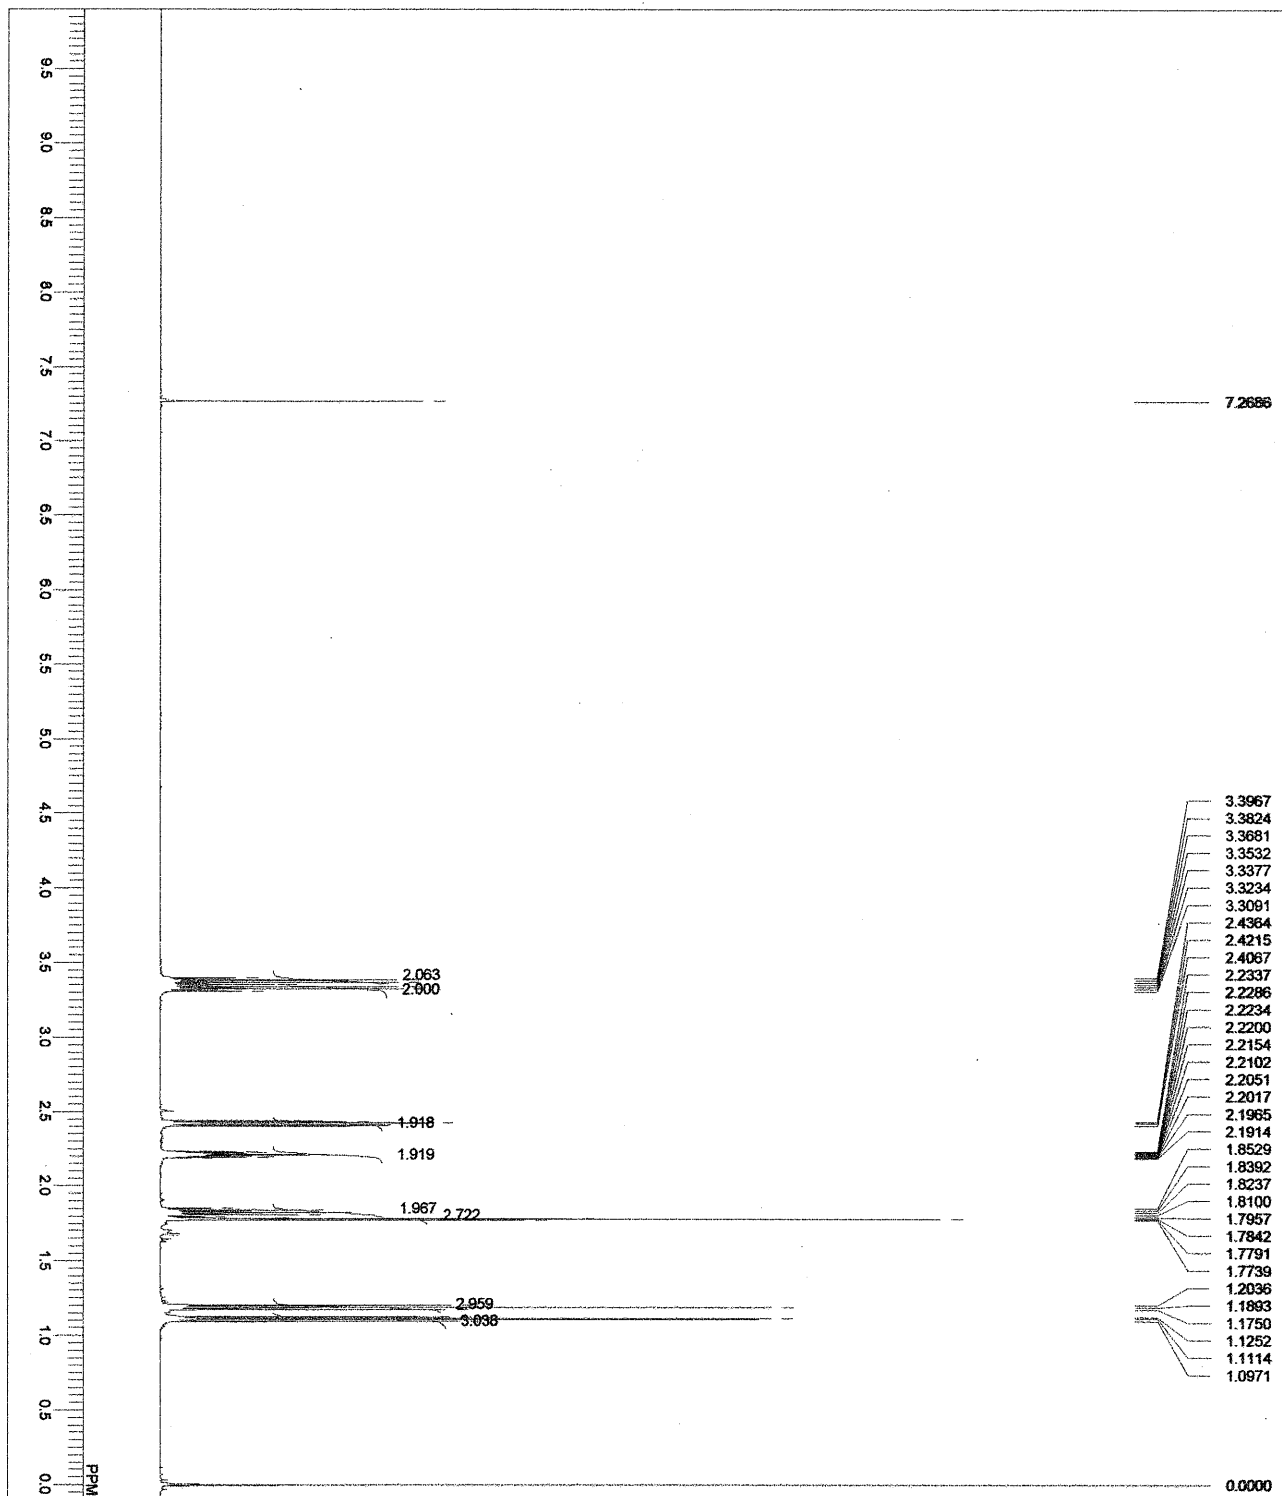

FILE: E:\20160326002-1-1.a16  
 CONINT: No.2849  
 DATIM: 2016-03-26 14:35:32  
 1H  
 EXMNUC: 1H  
 EXMNUC: proton, xpp  
 OBFREQ: 500.16 MHz  
 OBSSET: 2.41 KHz  
 OBFIN: 6.01 Hz  
 POINT: 28214  
 FREQU: 7507.51 Hz  
 SCANS: 8  
 ACQTM: 1.7459 sec  
 PD: 5.0000 sec  
 PVI: 5.55 usec  
 IRNUC: 1H  
 CTEMP: 32.1 °C  
 SLVNT: CDCl3  
 EXREF: 0.00 ppm  
 BF: 0.12 Hz  
 RGAIN: 30

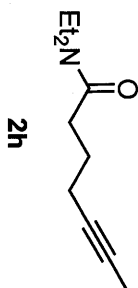



C:\Documents and Settings\user1\My Documents\W6Gouss\EverAlkylation\Ew20160326002Carbon-1-1.als

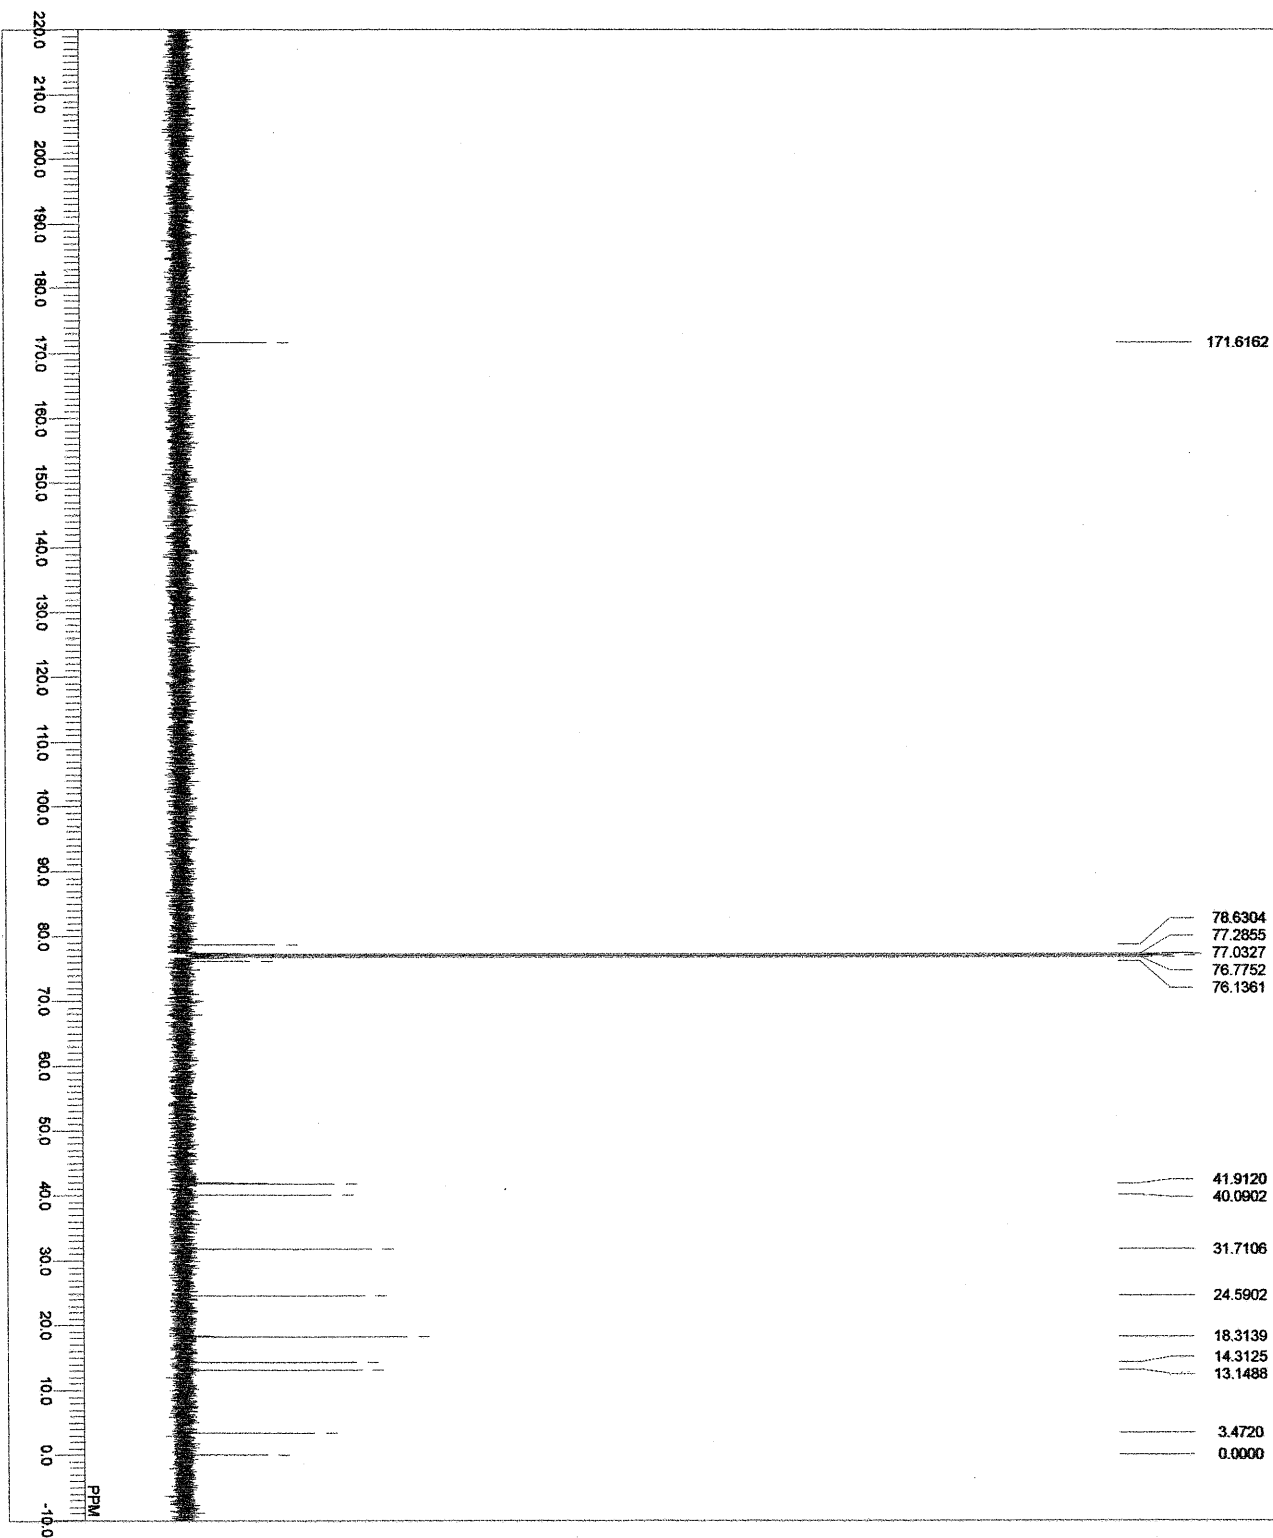

DFILE Ew20160326002Carbon-1-1.als  
 COMNT No.2849 Carbon  
 DATIN 2016-03-26 14:37:02  
 DEINJC 13C  
 EXMOC carbon\_1xp  
 OBFREQ 125.77 MHz  
 OBSSET 7.87 KHz  
 OBFIN 4.21 Hz  
 POINT 52428  
 FREQU 31448.54 Hz  
 SCANS 128  
 ACQTM 0.8336 sec  
 PD 2.000 sec  
 PM1 3.40 usec  
 IRNUC 1H  
 CTIMP 32.8 c  
 CDCL3  
 SLVNT 0.00 ppm  
 EXREF 0.62 Hz  
 BF 60  
 RGAIN

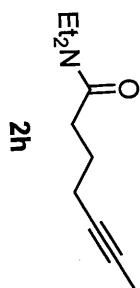

C:\Documents and Settings\user1\My Documents\NMR\GaussView\Alkylation\Ever20180428001-1-1.aif

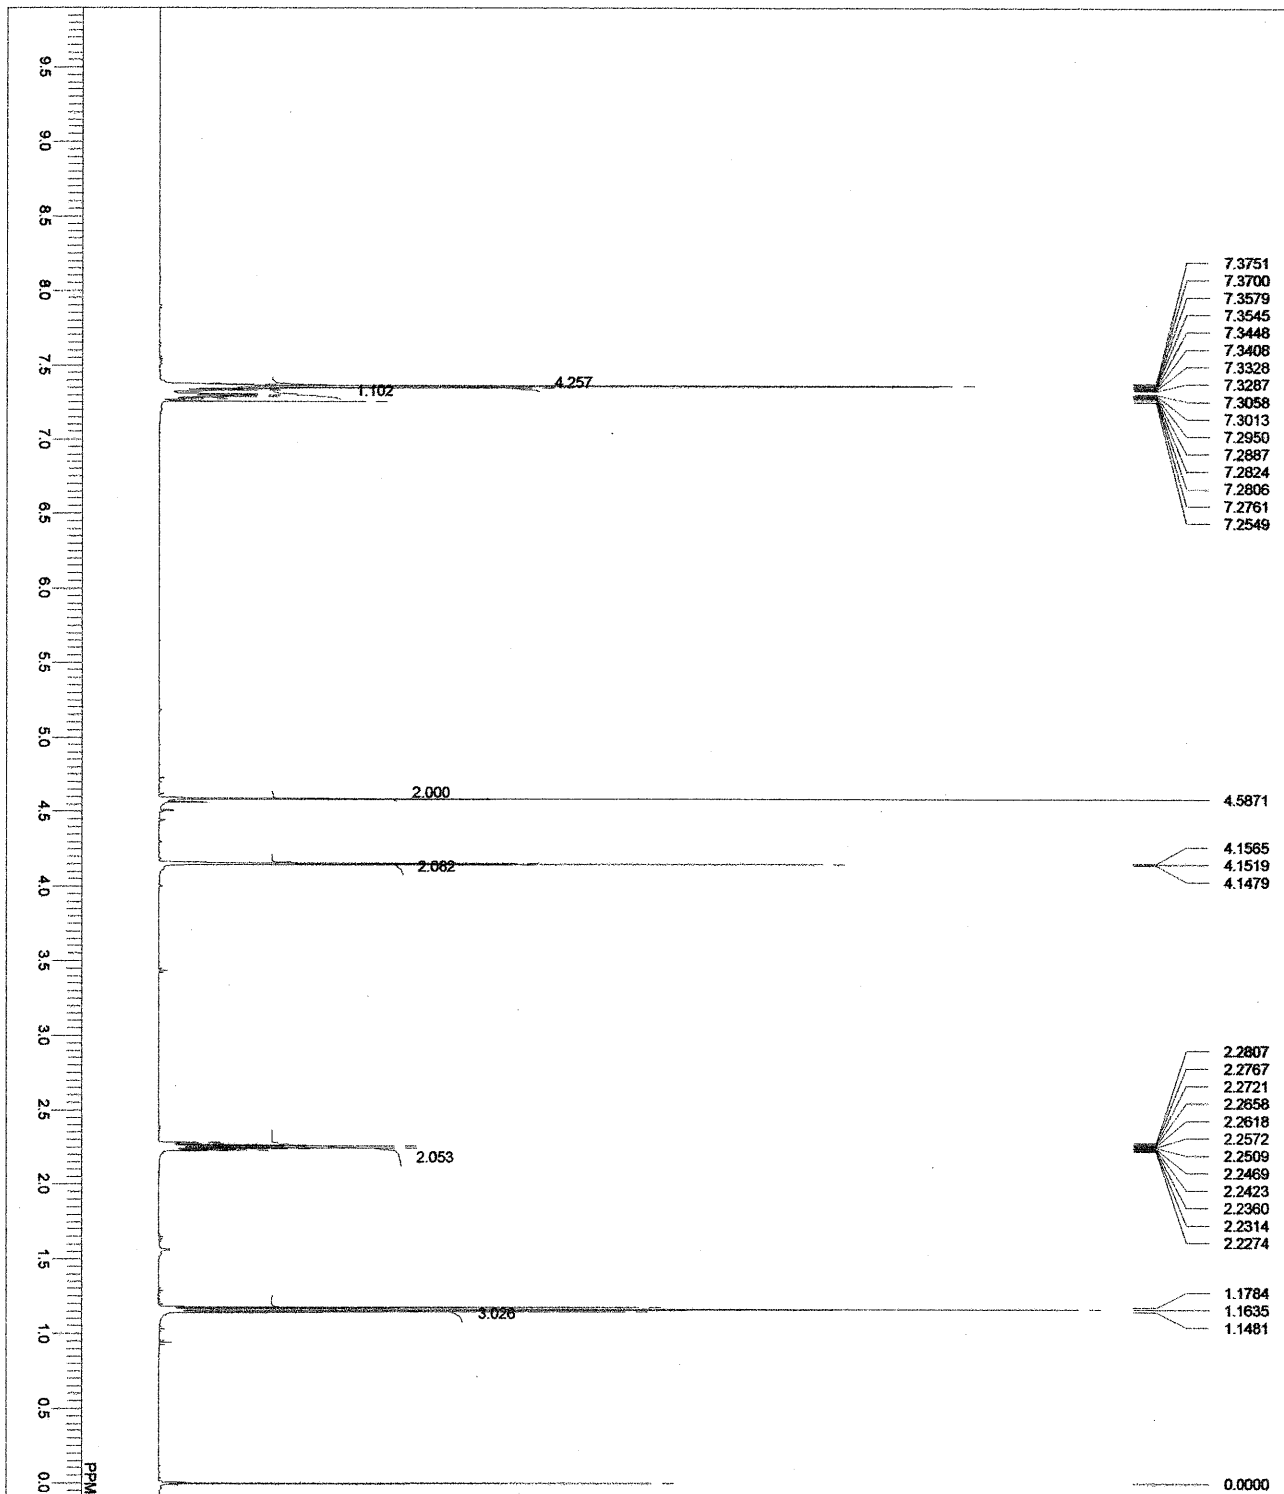

DFILE Ever20180428001-1-1.aif  
 COUNT No.2801  
 DATUM 2016-04-28 19:47:21  
 OBNUC 1H  
 EXMOD proton.jxp  
 OBFREQ 500.16 MHz  
 OBSSET 2.41 KHz  
 OBFIN 6.01 Hz  
 POINT 26214  
 FREQU 7507.51 Hz  
 SCANS 8  
 ACQTM 1.7469 sec  
 PD 5.0000 sec  
 PW1 5.55 usec  
 IRNUC 1H  
 CTEMP 21.2 c  
 SLVNT CDCl3  
 EXREF 0.00 ppm  
 BF 0.12 Hz  
 RGAIN 30

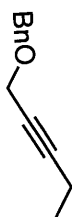

2j

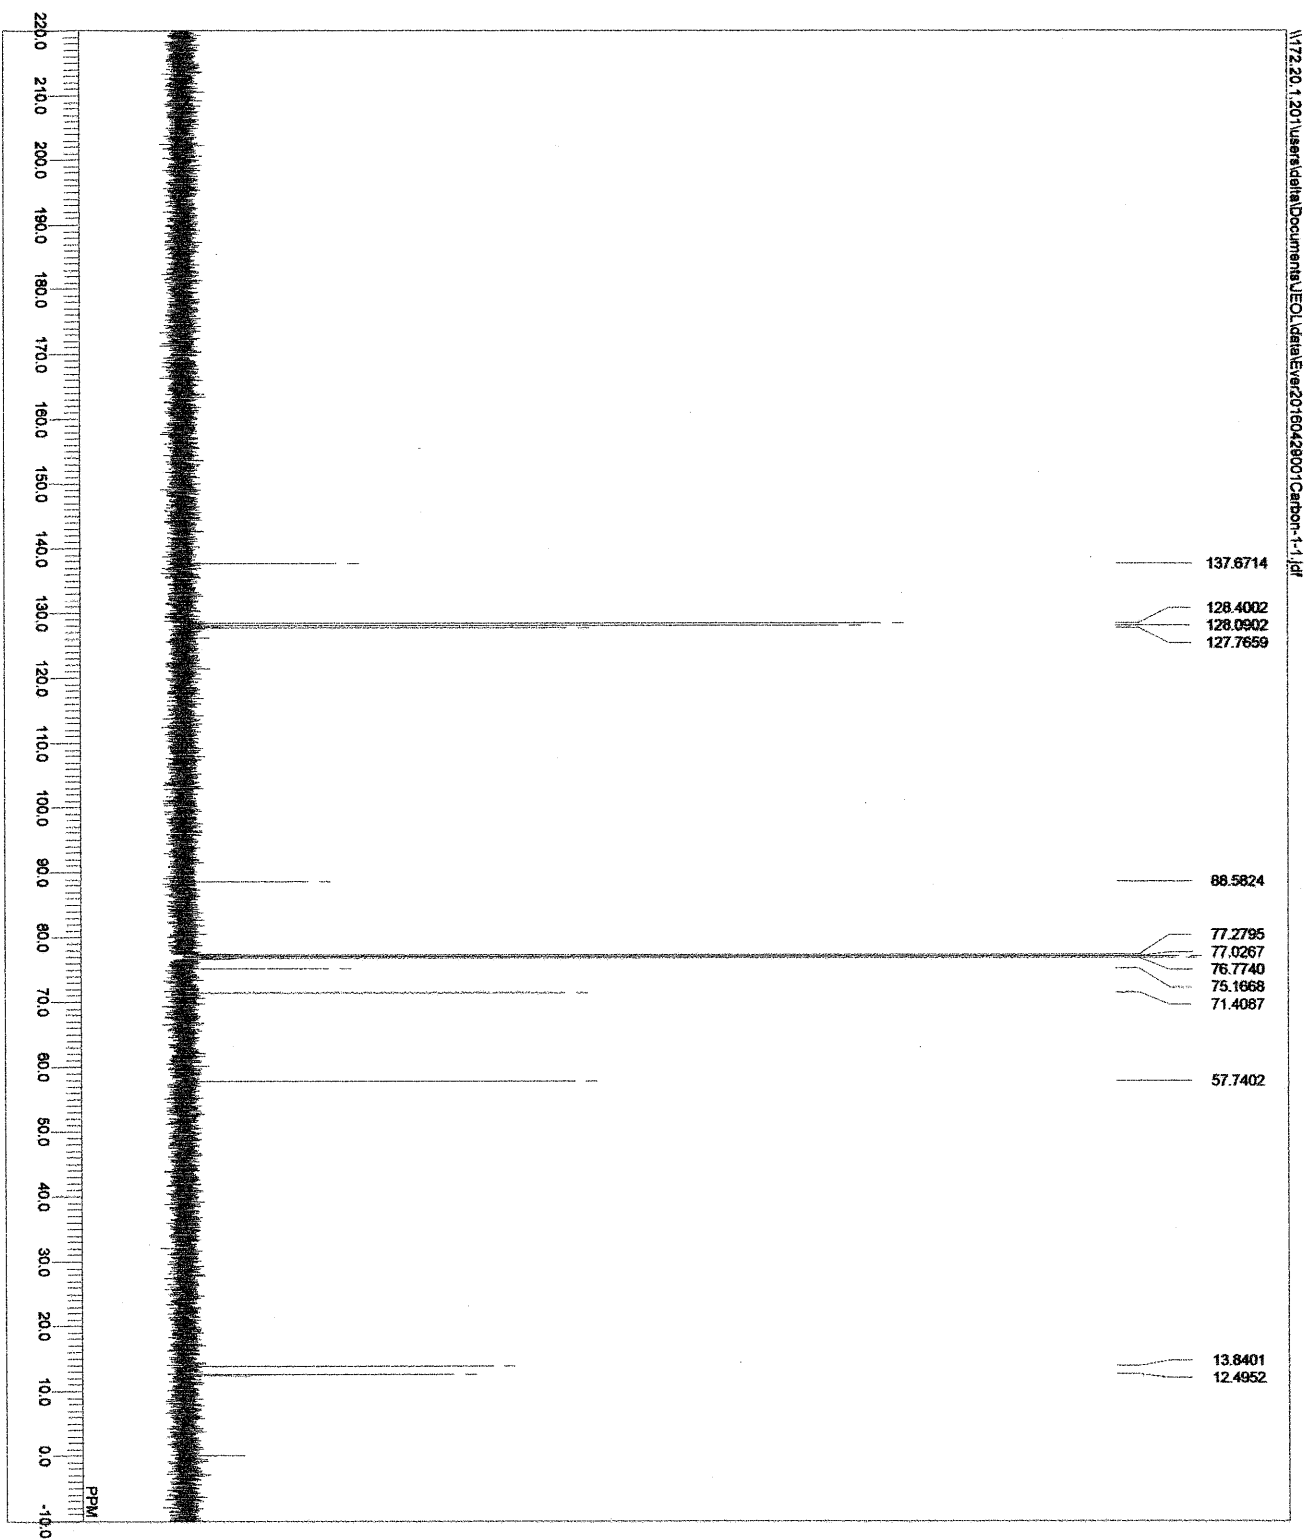

DFILE Ever20160428001\Carbon-1-1.jdt  
 COMNT No.2801 Carbon  
 DATIM 2016-04-29 19:48:50  
 CBNUC <sup>13</sup>C  
 EXMOD carbon-1p  
 OBFRQ 125.77 MHz  
 OBSET 7.87 KHz  
 OBFIN 4.21 Hz  
 POINT 65535  
 FRECU 39308.18 Hz  
 SCANS 76  
 ACQTM 0.8336 sec  
 PD 2.0000 sec  
 PWT 3.40 usec  
 IRNUC <sup>1</sup>H  
 CTEMP 21.4 c  
 CDCL3 0.00 ppm  
 SLVNT EXREF  
 BF 0.82 Hz  
 RGAIN 60

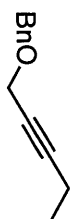

2j

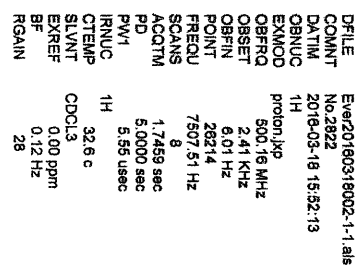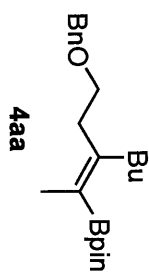

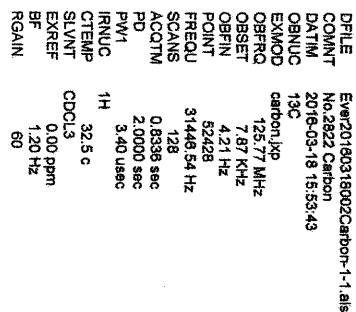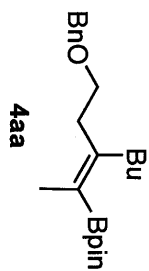

C:\Documents and Settings\user1\My Documents\NMR\GaussView\Atty\Boreton\Boreton20160319008-1-1.aif

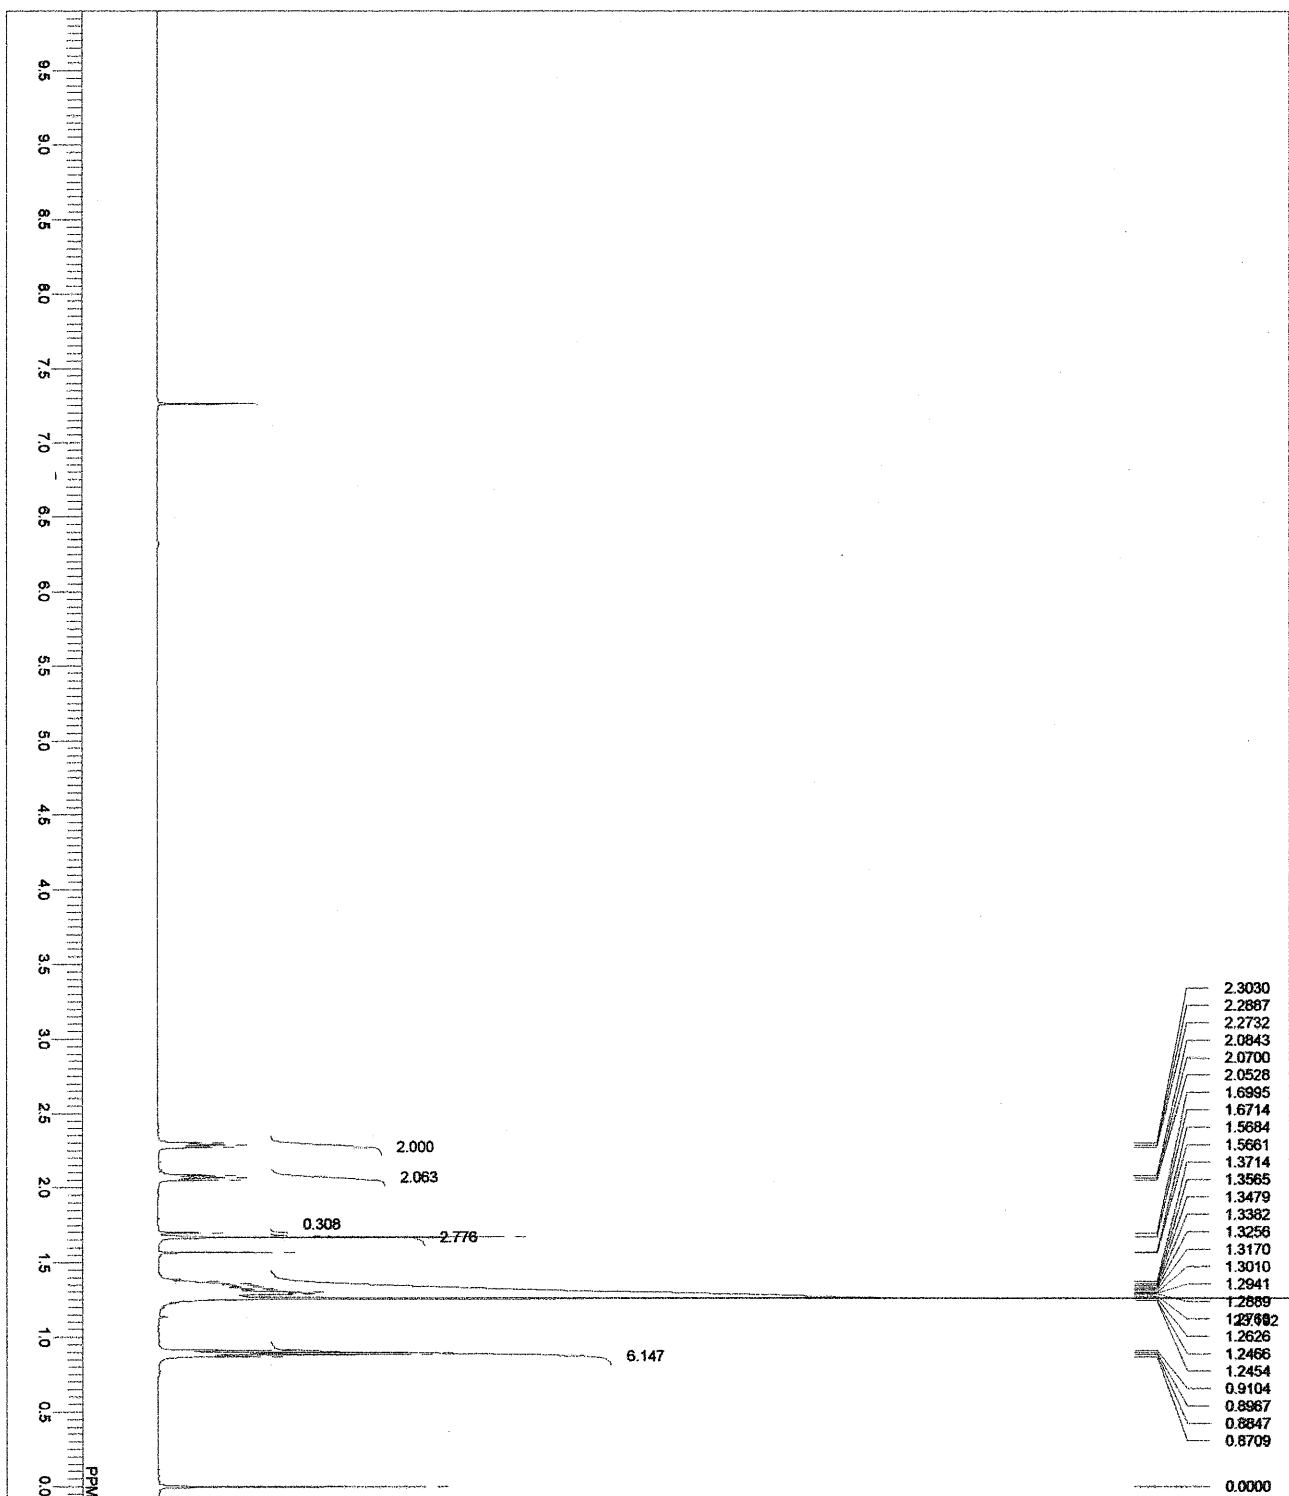

DFILE E:\20160319008-1-1.aif  
 COUNT No.2830  
 DATIM 2016-03-19 18:13:38  
 1H  
 EXMOD proton, xcp  
 OBSFREQ 500.16 MHz  
 OBSSET 2.41 KHz  
 OBSFIN 6.01 Hz  
 POINT 28214  
 FREOU 7507.51 Hz  
 SCANS 8  
 ACQTIM 1.7459 sec  
 PD 6.0000 sec  
 PWT 5.55 usec  
 IRNUC 1H  
 CTEMP 32.9 c  
 SLVNT CDCl<sub>3</sub>  
 EXREF 0.00 ppm  
 BF 0.12 Hz  
 RGAIN 30

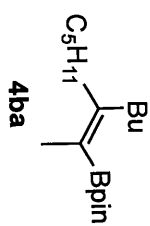

C:\Documents and Settings\user1\My Documents\Ever\Allylboration\Ever\20160318008Carbon-1-1.a1s

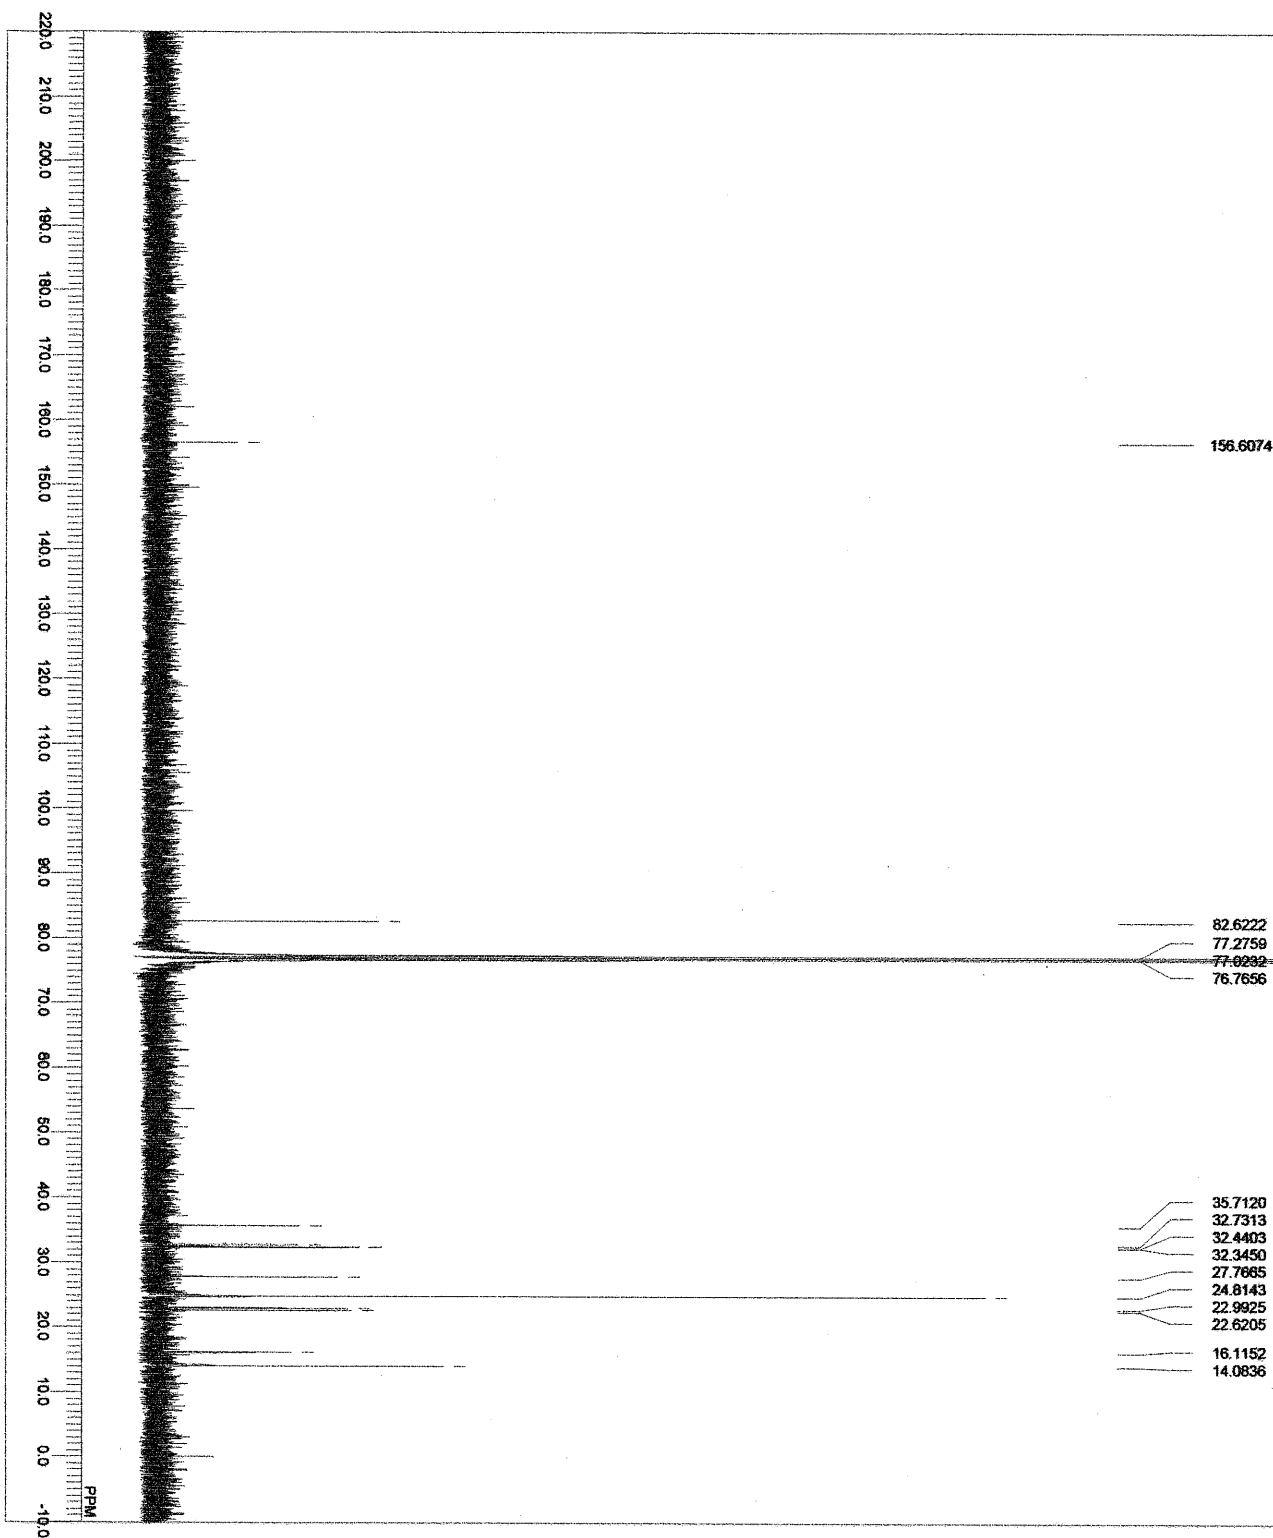

DFILE Ever20160318008Carbon-1-1.a1s  
 COUNT No.2830 Carbon  
 DATIM 2016-03-19 18:15:07  
 OBNUC 13C  
 EXMOD carbon.jpg  
 OFFREQ 125.77 MHz  
 OFFSET 7.87 KHz  
 OBPIN 4.21 Hz  
 POINT 52428  
 FREQU 31446.54 Hz  
 SCANS 68  
 ACQTM 0.8336 sec  
 PD 2.0000 sec  
 PW1 3.40 usec  
 IRNUC 1H  
 CTEMP 29.8 c  
 SLVNT CDCl3  
 EXREF 0.00 ppm  
 BF 0.92 Hz  
 RGAIN 60

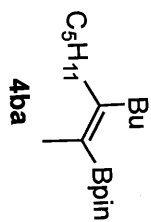

C:\Documents and Settings\user1\My Documents\EverAlly\Boration\Eve\20160409001-1-1.a16

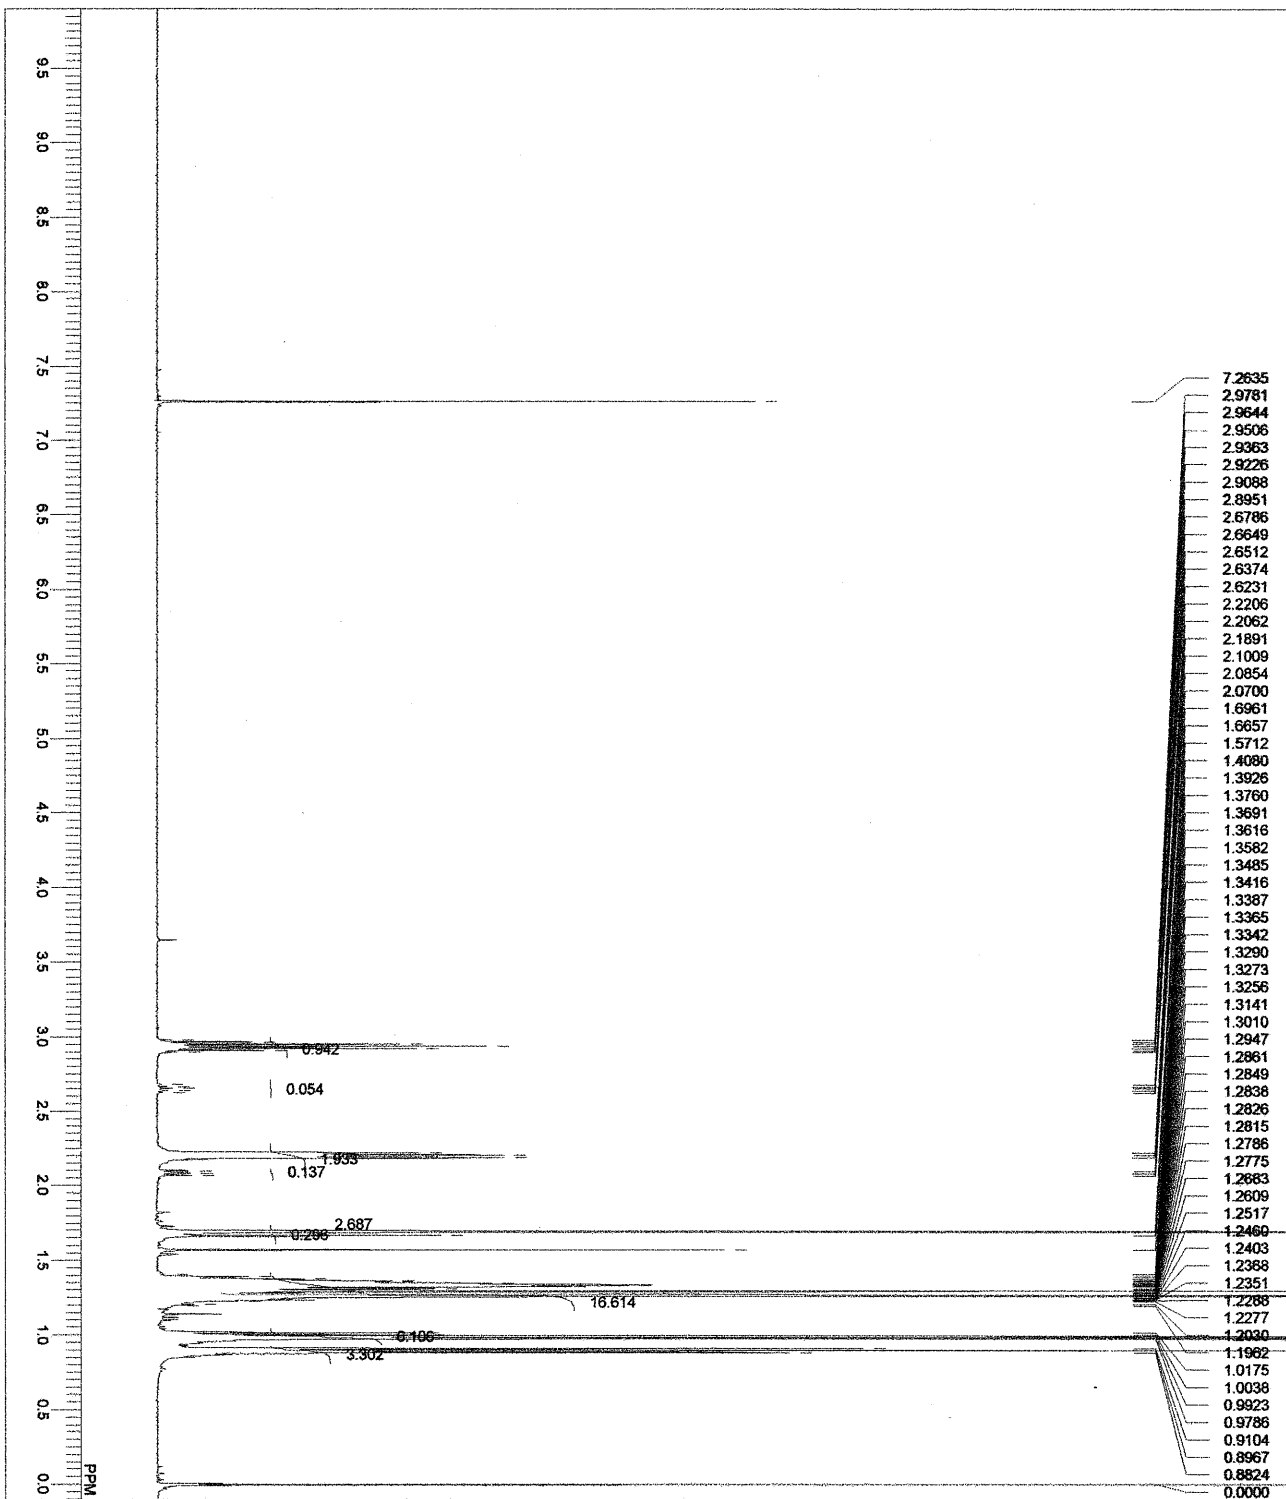

DFILE Ever20160409001-1-1.a16  
 COMNT No.2856 GPC  
 DATIM 2016-04-09 17:07:59  
 OBNUC 1H  
 EXMOD proton.jxp  
 OBSFRO 500.16 MHz  
 OBSSET 2.41 KHz  
 OBSFIN 6.01 KHz  
 POINT 26214  
 FRECU 7507.51 Hz  
 SCANS 8  
 ACQTM 1.7459 sec  
 PD 5.0000 sec  
 PNM1 5.55 usec  
 IRNUC 1H  
 CTEMP 33.1 c  
 SLVNT CDCL3  
 EXREF 0.00 ppm  
 BF 0.12 Hz  
 RGAIN 30

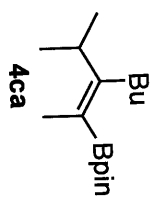



C:\Documents and Settings\user1\My Documents\Goussier\Alkylation\Ever20160406001Carbon-1-1.aie

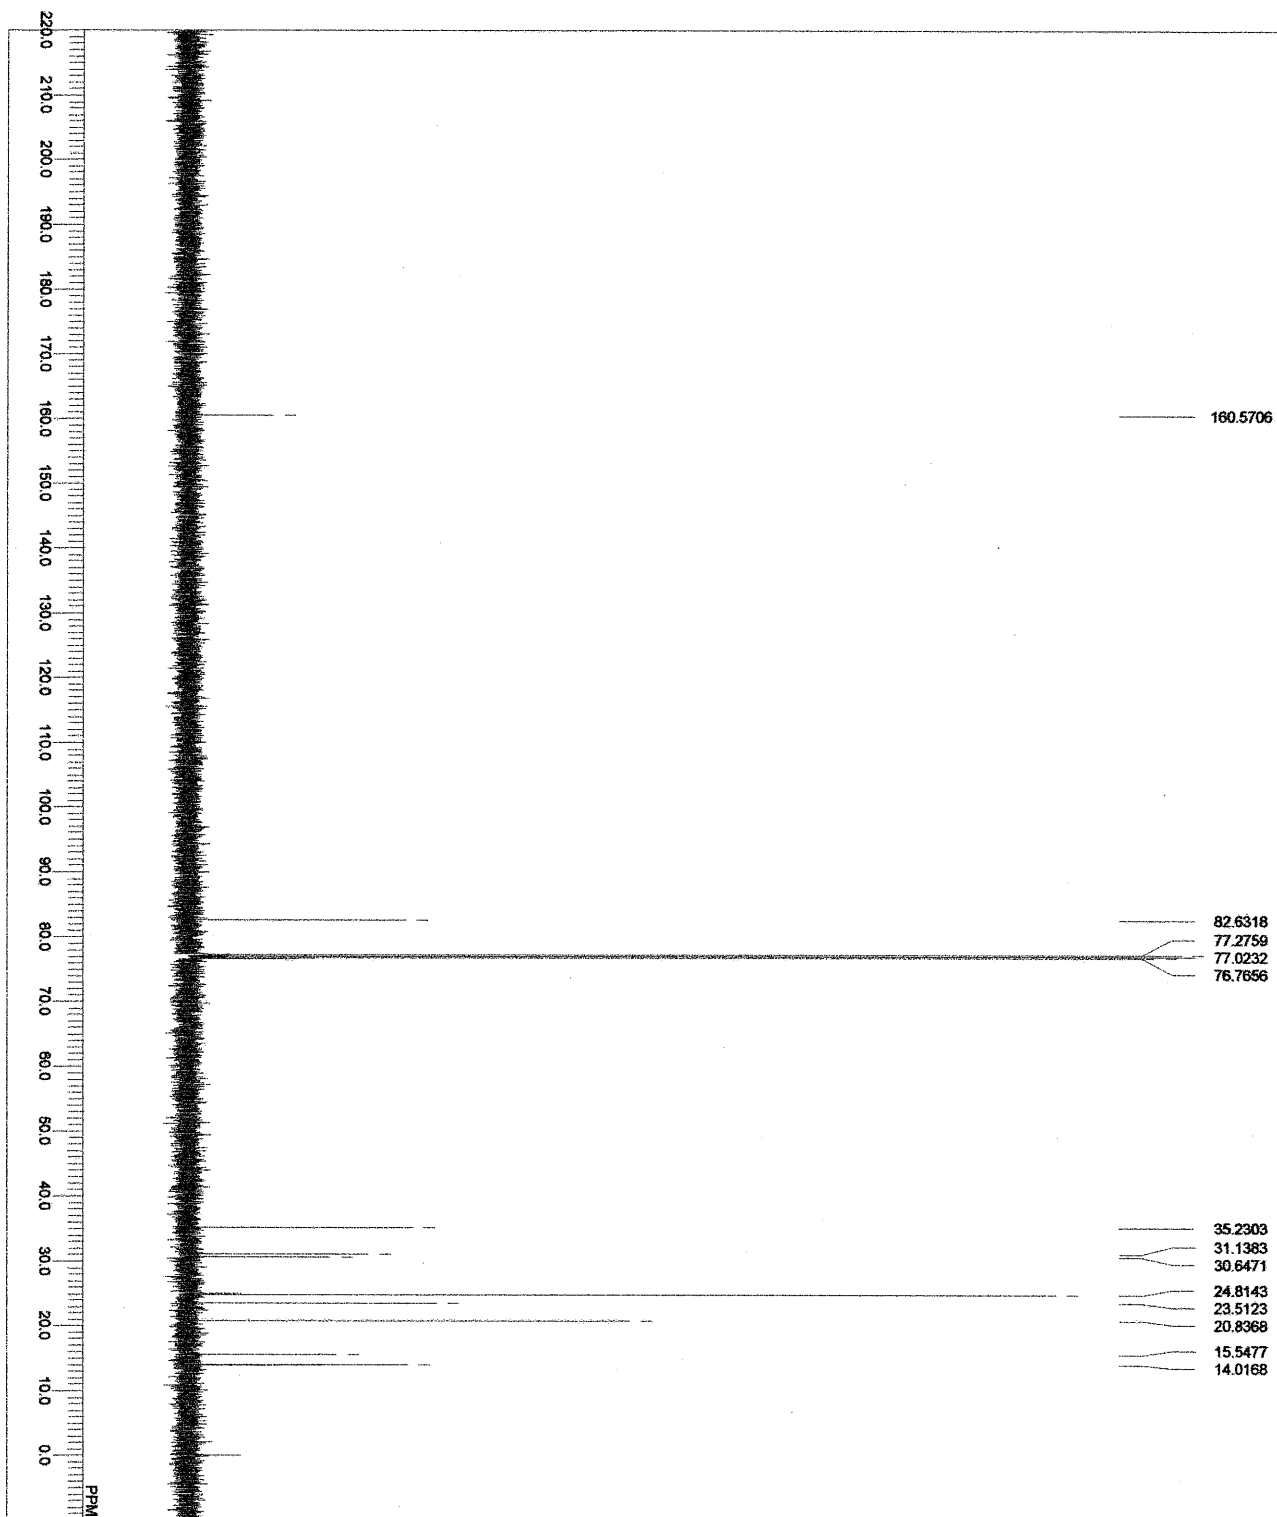

FILE Ever20160406001Carbon-1-1.aie  
 COUNT No.2856 GPC Carbon  
 DATE 2016-04-06 17:10:11  
 13C  
 EXMOD carbon1.jp  
 OBSFQ 125.77 MHz  
 OBSSET 7.87 KHz  
 OBSFN 4.21 Hz  
 POINT 52428  
 FREQU 31446.54 Hz  
 SCANS 86  
 ACQTM 0.8336 sec  
 PD 2.0000 sec  
 PVM 3.40 usec  
 1H  
 IRNUC 32.3 c  
 CTEMP CDOL3  
 SLVNT 0.00 ppm  
 EXREF 0.82 Hz  
 BF 60  
 RGAIN

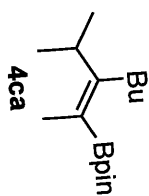

C:\Documents and Settings\user1\My Documents\EverAlly\laboration\Ever20160320003-1-1.aie

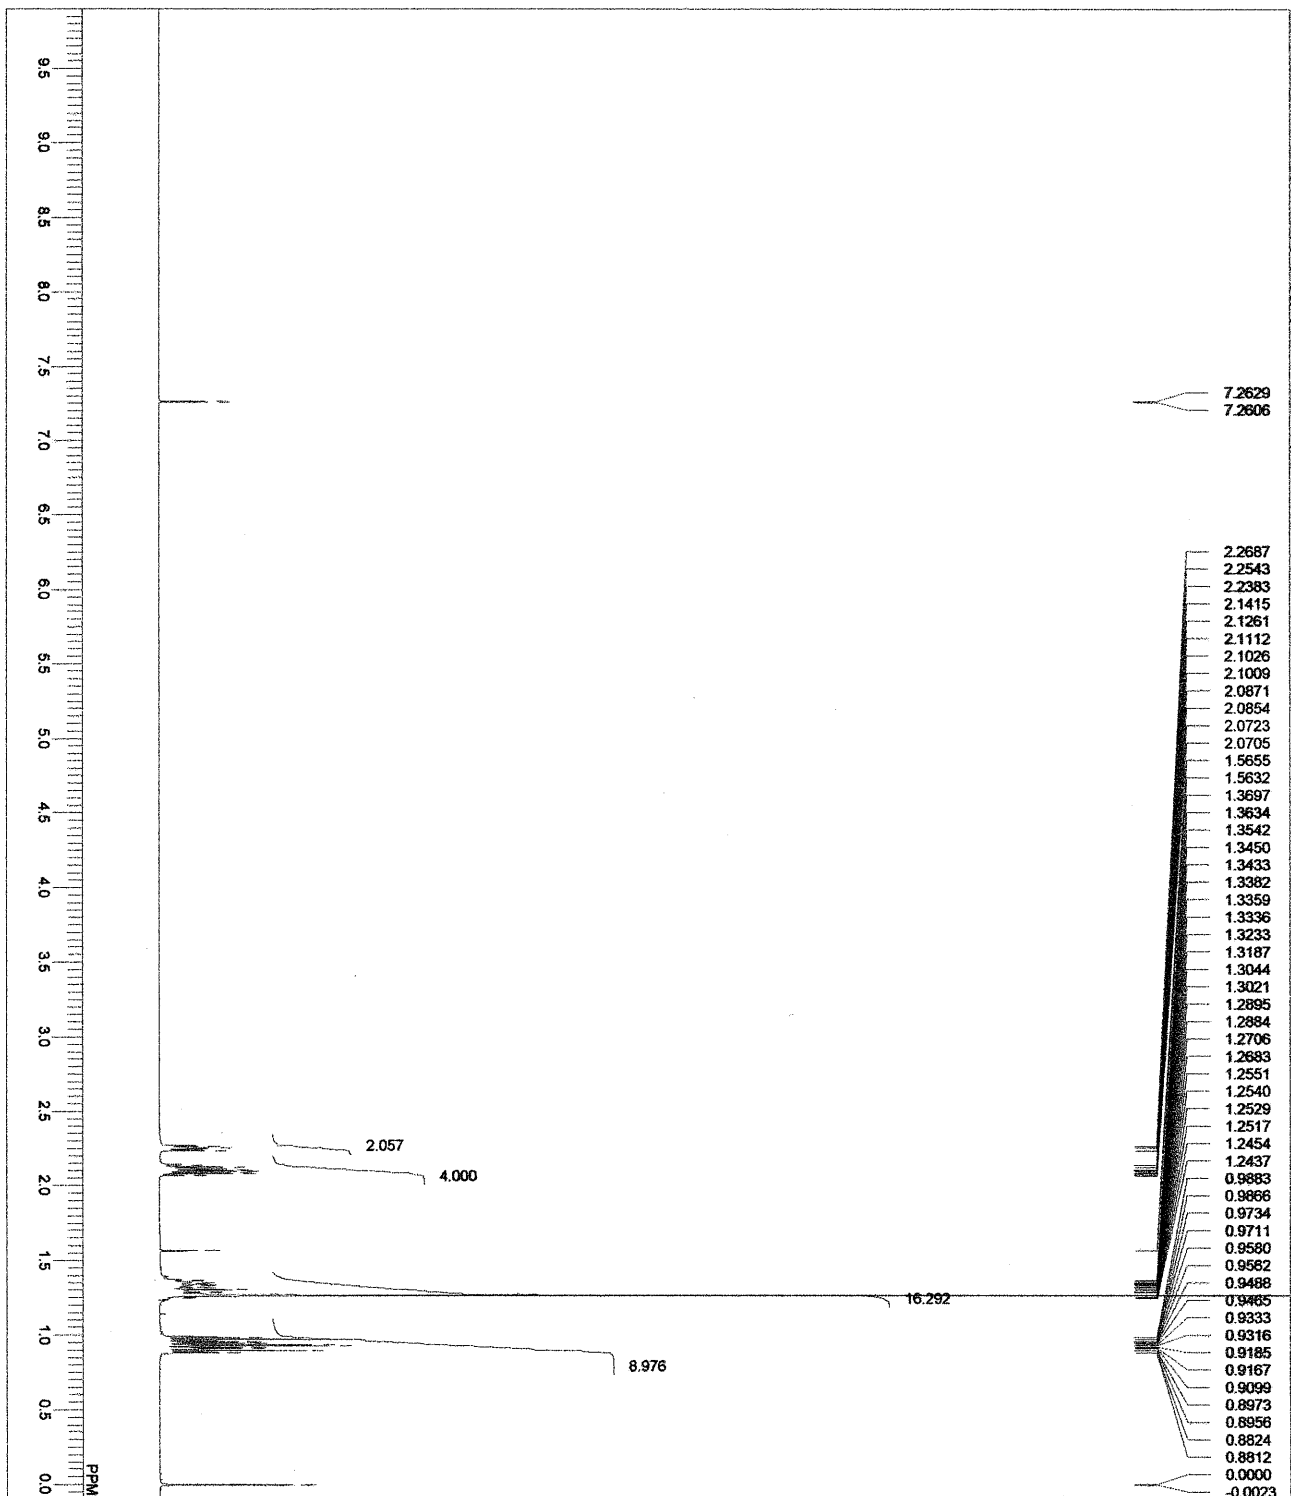

FILE Ever20160320003-1-1.aie  
 COMMENT No.2834  
 DATIM 2016-03-20 15:31:42  
 OBNUC 1H  
 EXMOD proton\_jyp  
 OBFREQ 500.16 MHz  
 OBSSET 2.41 KHz  
 OBFIN 6.01 Hz  
 POINT 28214  
 FRECU 7507.51 Hz  
 SCANS 8  
 ACQTM 1.7459 sec  
 PD 5.0000 sec  
 PVI 5.55 usec  
 IRNUC 1H  
 CTMP 32.7 c  
 SLVT CDCl3  
 EXREF 0.00 ppm  
 BF 0.12 Hz  
 RGAIN 30

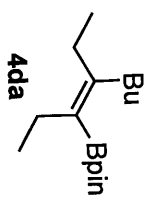

C:\Documents and Settings\user1\My Documents\NMR\GaussView\Allylation\NMR\2016032003Carbon-1-1.a1s

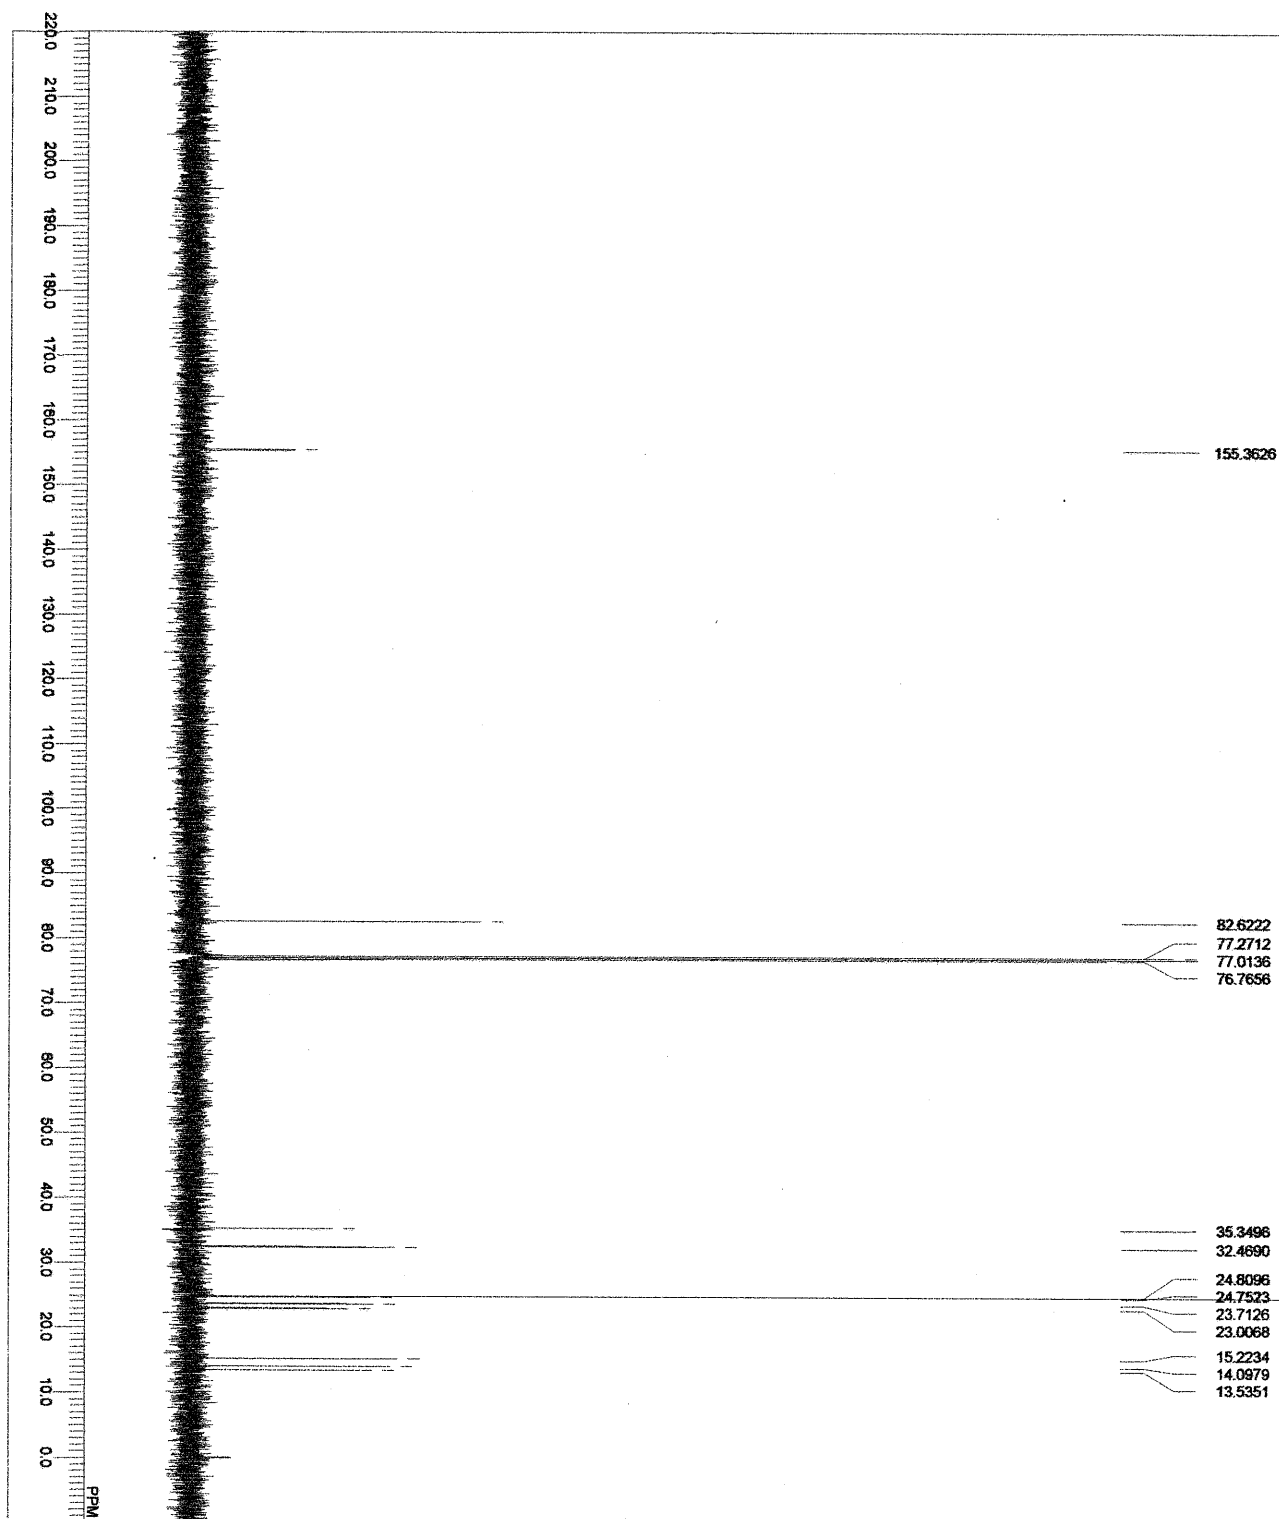

DFILE Ever2016032003Carbon-1-1.a1s  
 CONNT No.2834 Carbon  
 DATM 2016-03-20 15:33:12  
 OBNUC <sup>13</sup>C  
 EXMOD carbon, 1p  
 OFREQ 125.77 MHz  
 OBSET 7.87 KHz  
 POINT 4.21 Hz  
 FREQD 26214  
 SCANS 31446.64 Hz  
 ACQTM 66  
 PD 0.8336 sec  
 PW1 2.0000 sec  
 IRNUC 3.40 usec  
 CTEMP 32.5 C  
 SLVNT CDCl<sub>3</sub>  
 EXREF 0.00 ppm  
 BF 0.32 Hz  
 RGAIN 60

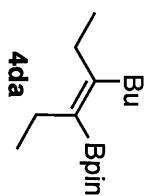

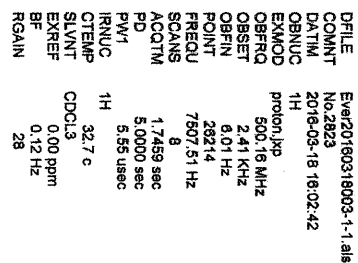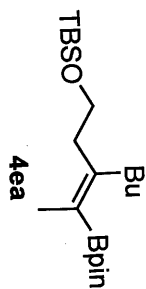

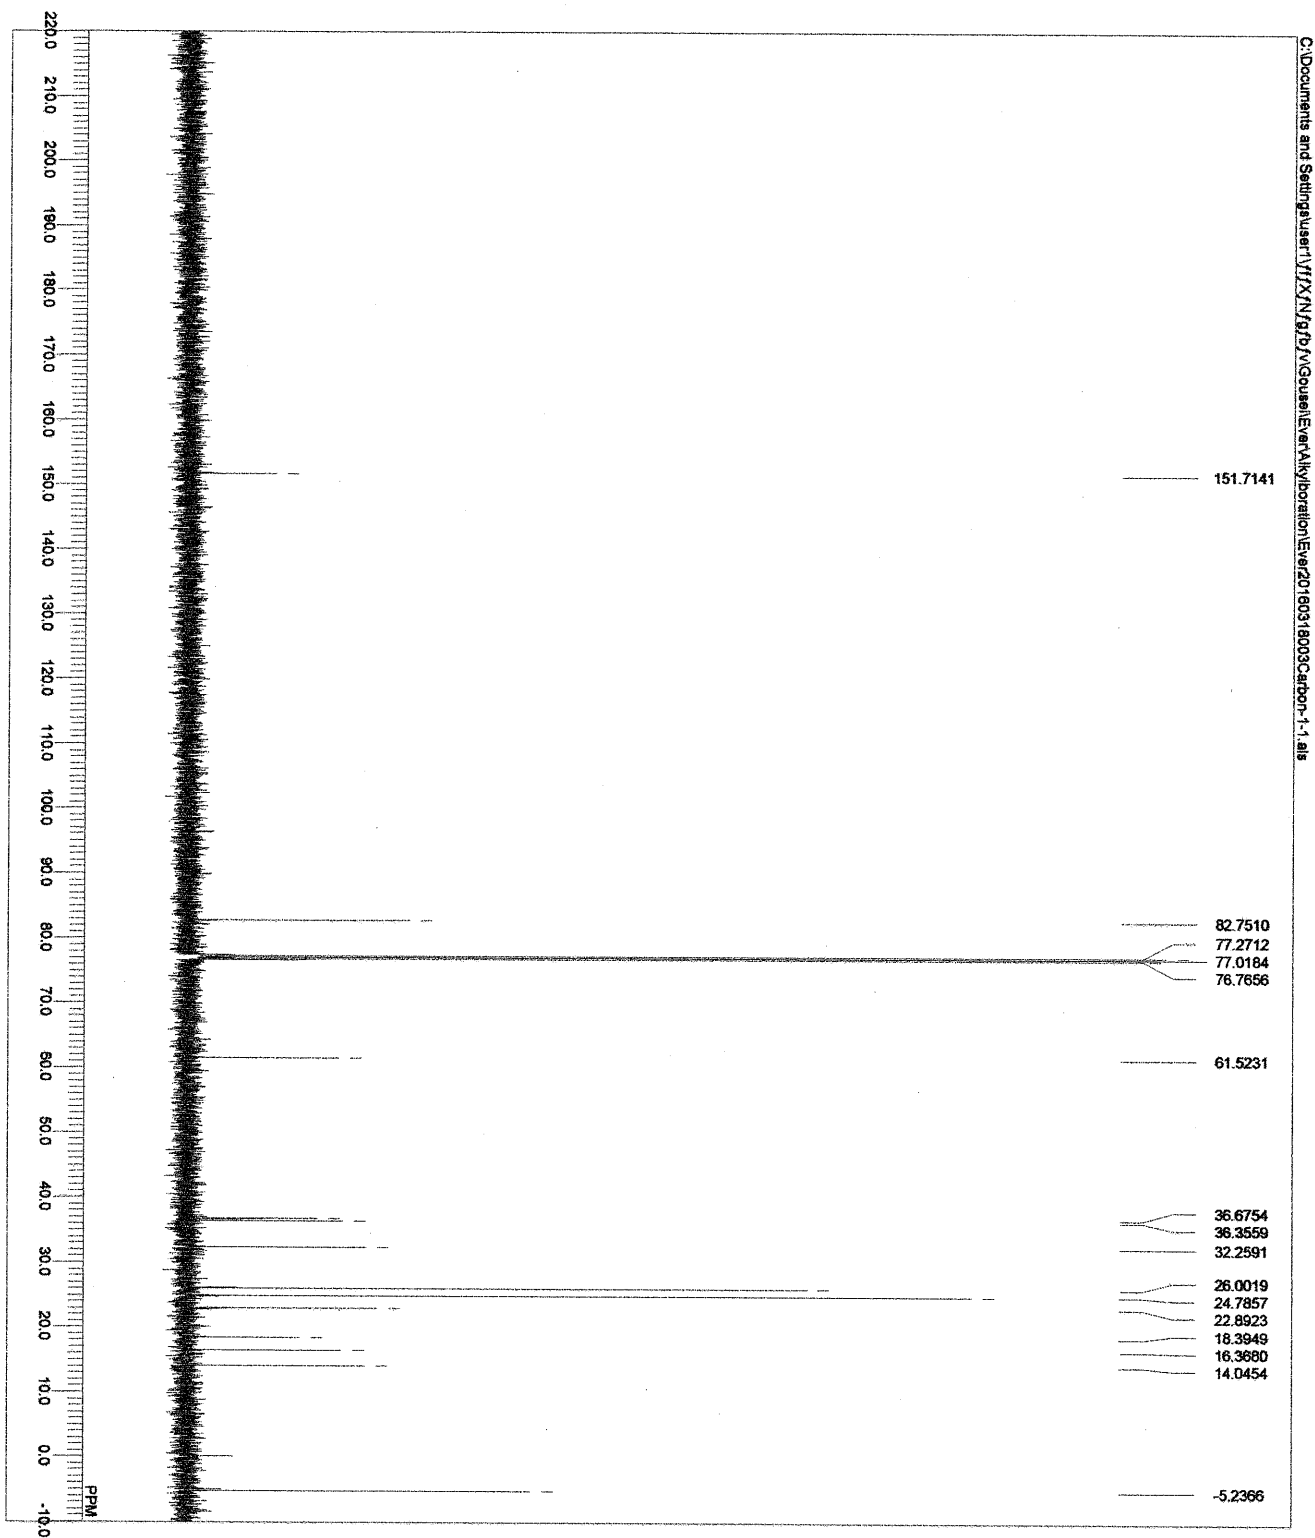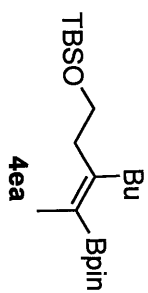

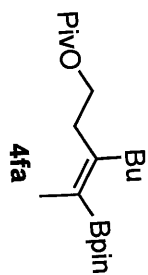

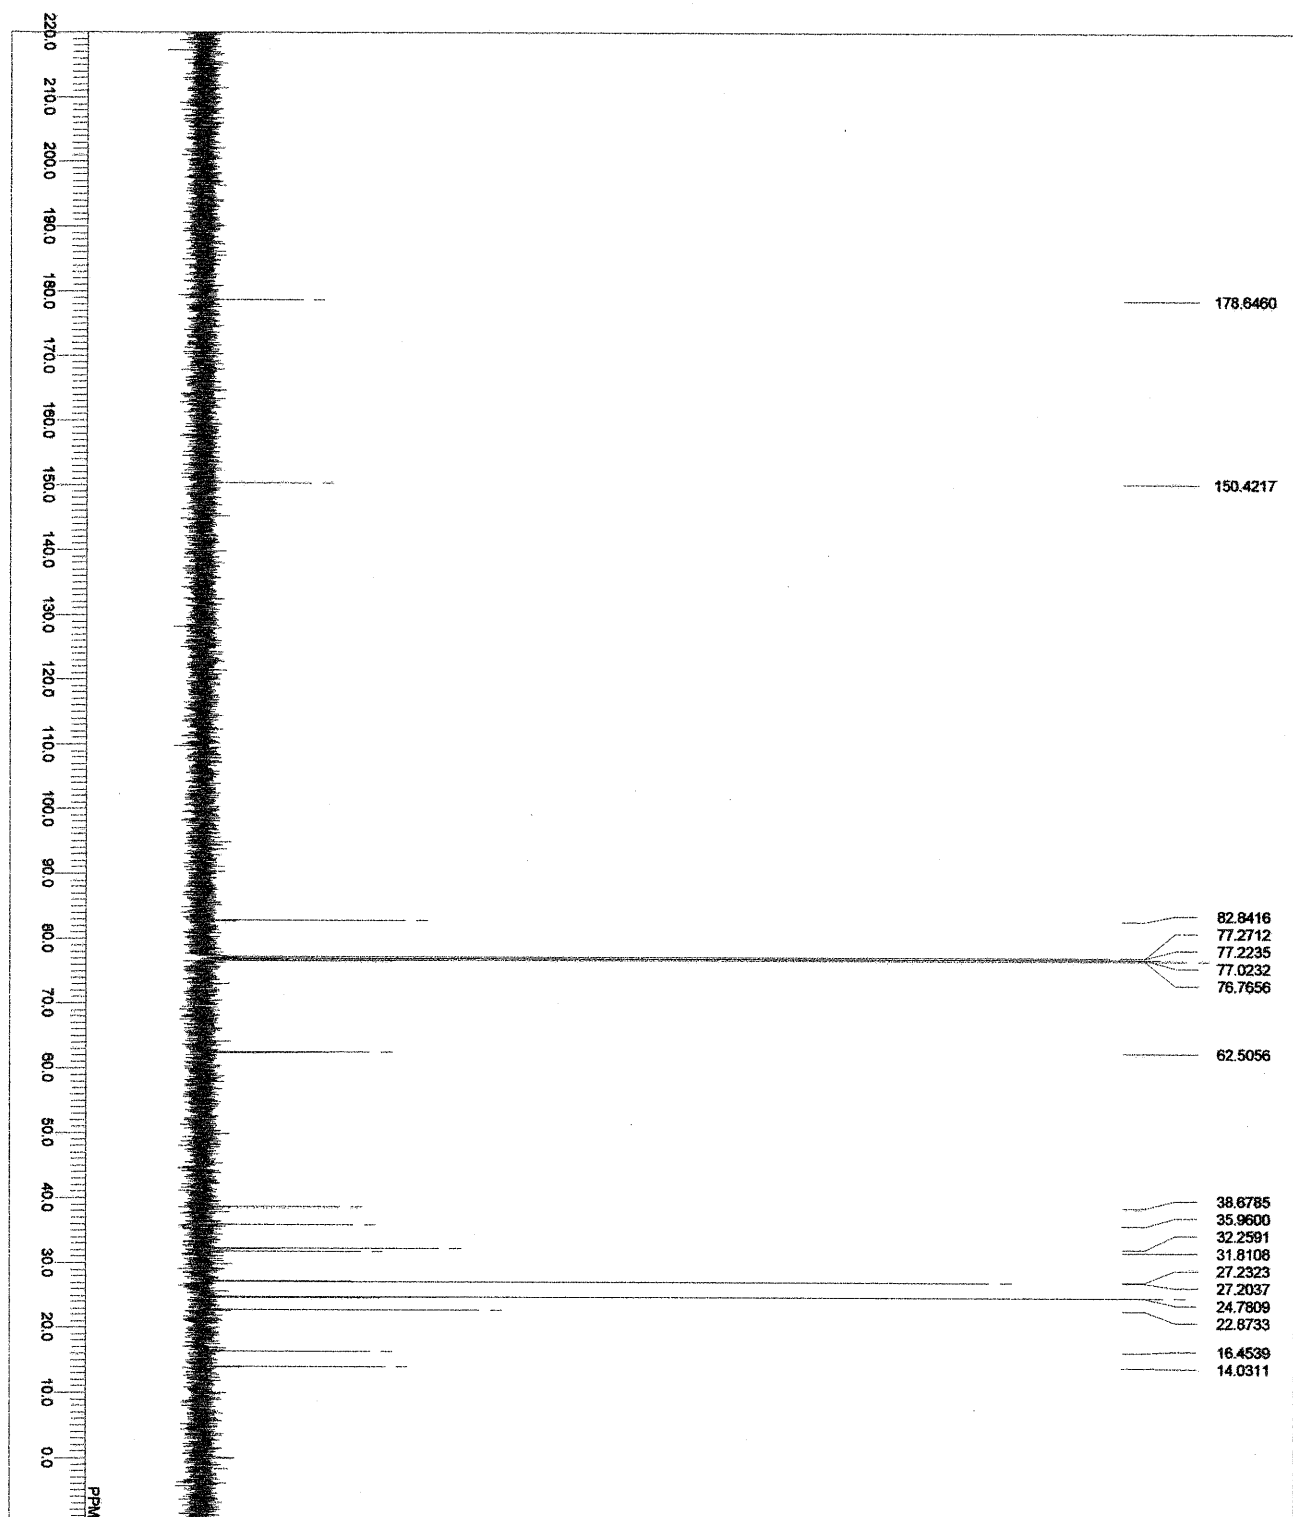

|        |                              |
|--------|------------------------------|
| PF1E   | Ever20160200002Carbon-1-1,1a |
| COMINT | No.2833 Carbon               |
| DATEIM | 2016-03-20 15:28:07          |
| ONUC   | <sup>13</sup> C              |
| EXMDO  | carbon, jnp                  |
| OFBRD  | 125.77 MHz                   |
| OBSET  | 17.87 MHz                    |
| OFPIN  | 4.21 kHz                     |
| POINT  | 262.14                       |
| FRECU  | 3144654 Hz                   |
| SCANS  | 66                           |
| ACQTM  | 0.8336 sec                   |
| PD     | 2.0000 sec                   |
| PW1    | 3.40 usec                    |
| IRNUC  | 1H                           |
| CTEMP  | 29.6 c                       |
| SLVNT  | CDCl <sub>3</sub>            |
| EXREF  | 0.00 ppm                     |
| BF     | 0.72 Hz                      |
| RGAIN  | 60                           |

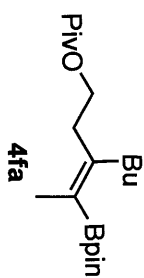

C:\Documents and Settings\user1\My Documents\NMR\Gaussi\EverAlly\boration\Ever20160330002-1-1.a16

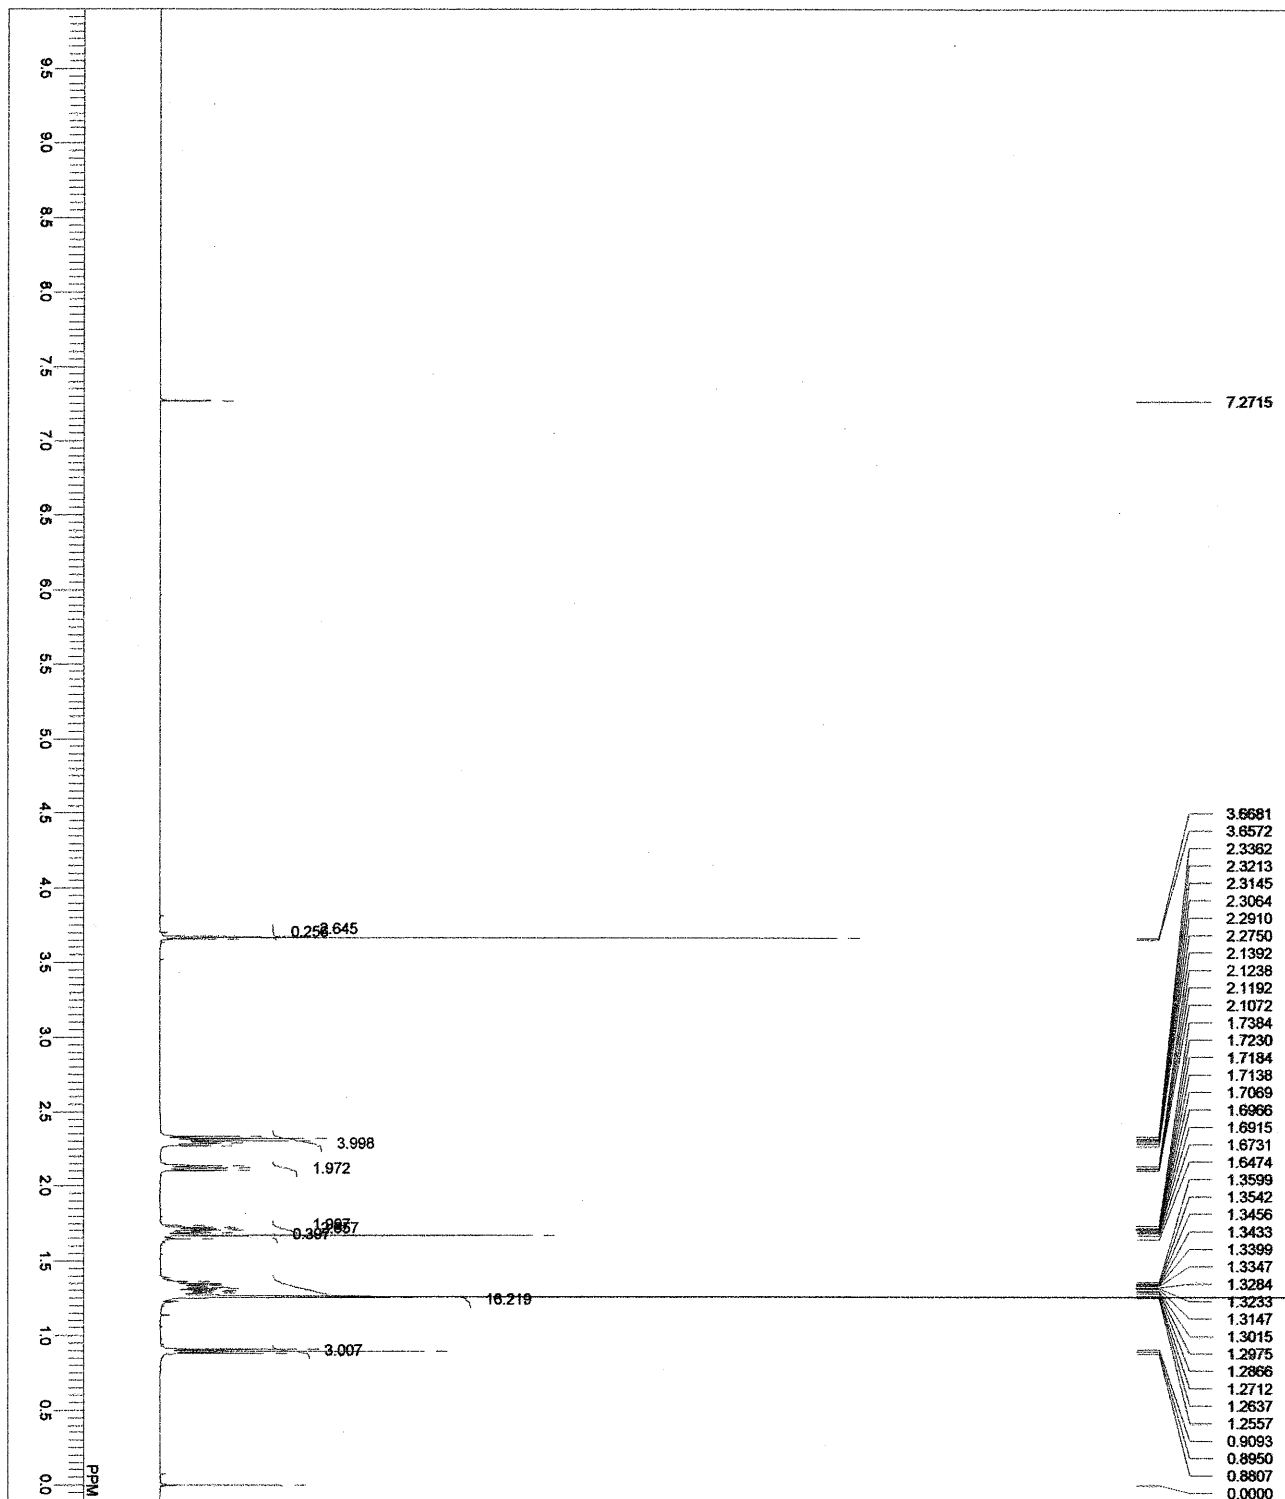

FILE Ever20160330002-1-1.a16  
 COUNT No.2857  
 DATIN 2016-03-30 15:45:47  
 OBNUC <sup>1</sup>H  
 EXMOC proton.jpg  
 OBFRQ 500.16 MHz  
 OBSET 2.41 KHz  
 OBFIN 6.01 Hz  
 POINT 26214  
 FREQU 7507.51 Hz  
 SCANS 8  
 ACQTM 1.7459 sec  
 PD 5.0000 sec  
 PM1 5.55 usec  
 IRNUC <sup>1</sup>H  
 CTEMP 32.4 c  
 SLVNT CDCl<sub>3</sub>  
 EXREF 0.00 ppm  
 BF 0.12 Hz  
 RGAIN 26

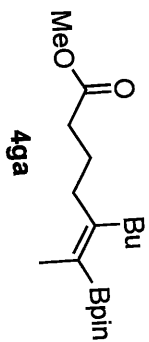



C:\Documents and Settings\user1\17X\N\9\16\Goussell\EverAlkylation\Ever20160330002\Carbon-1-1.a16

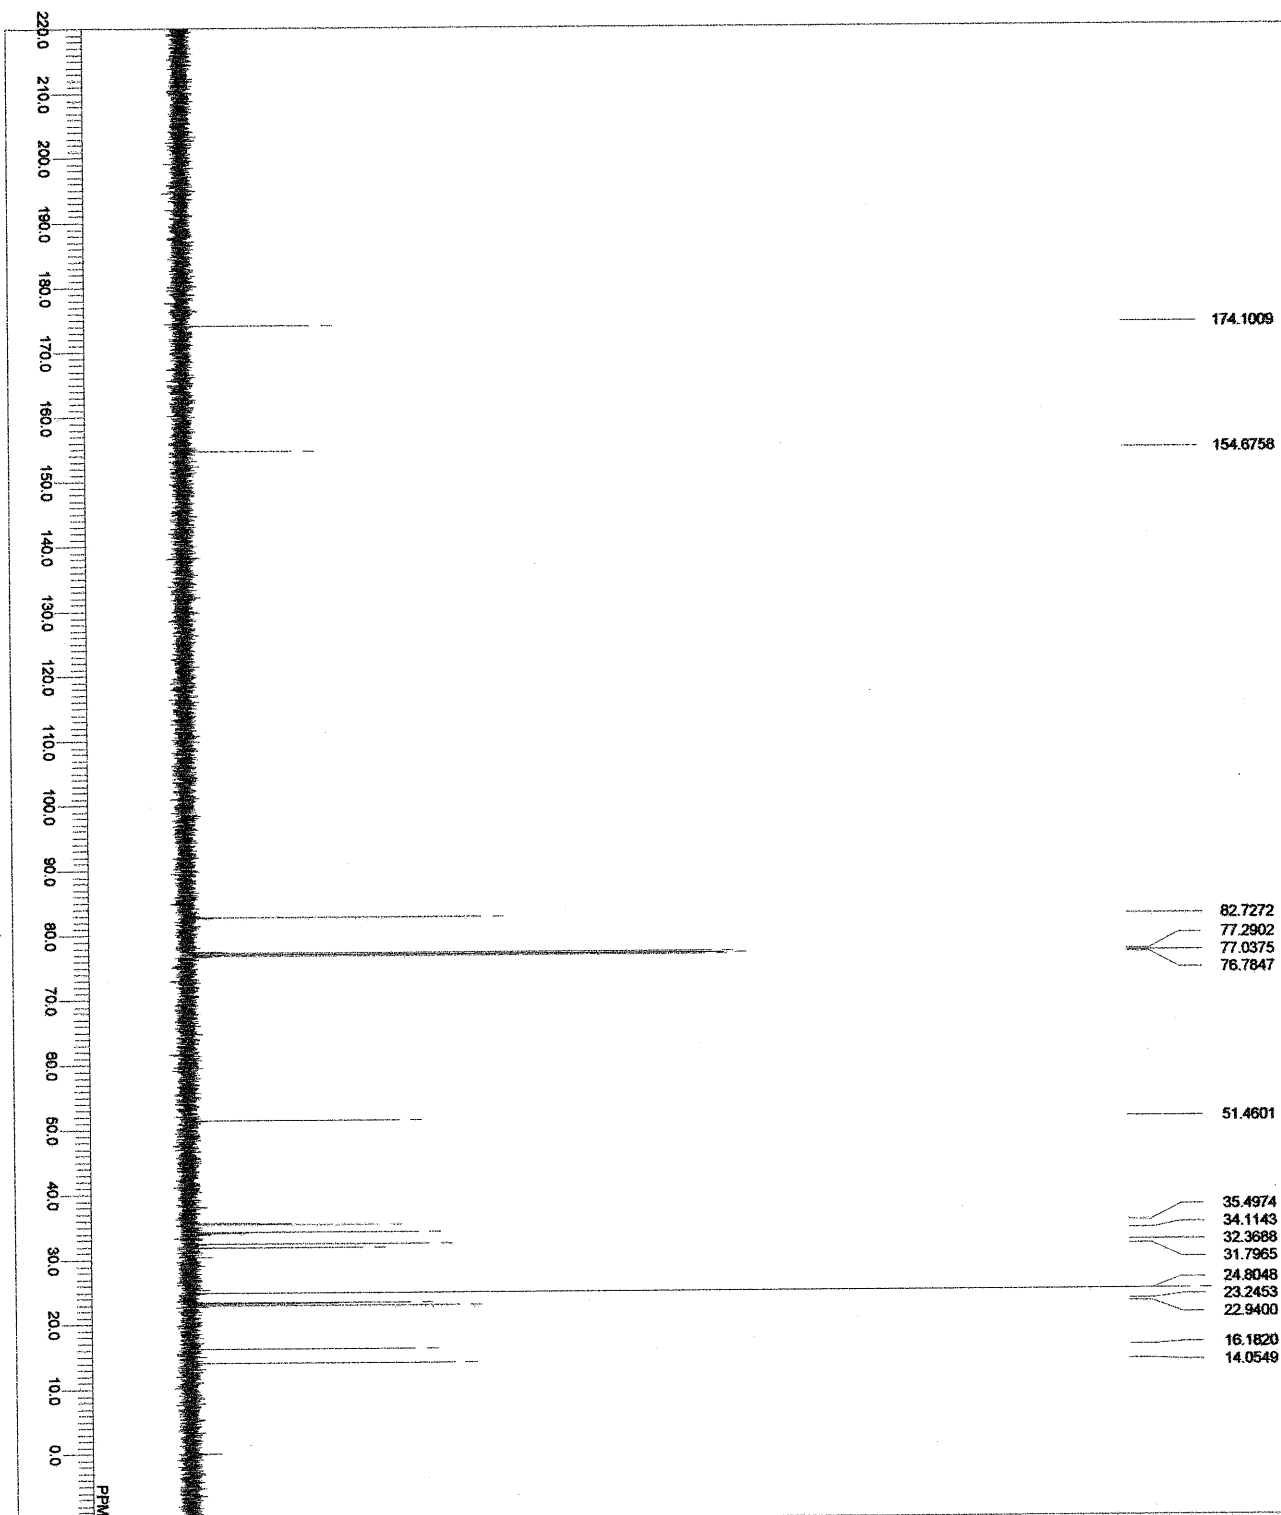

FILE Ever20160330002\Carbon-1-1.a16  
 COUNT No.2857 Carbon  
 DATIM 2016-03-30 15:47:17  
 13C  
 OBNUC carbon-13p  
 EXMOD 125.77 MHz  
 OBSRG 7.87 KHz  
 OBSSET 4.21 Hz  
 OBSFIN 52428  
 POINT 31440.54 Hz  
 FREQU 64  
 SCANS 0.8336 sec  
 ACQTM 2.0000 sec  
 PD 3.40 usec  
 PNU1 1H  
 IRNUC 32.6 c  
 CTEMP CDCL3  
 SLVNT 0.00 ppm  
 EXREF 0.62 Hz  
 BF 60  
 RGAIN

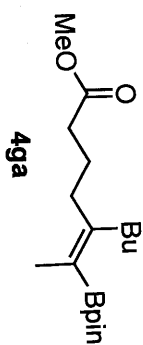

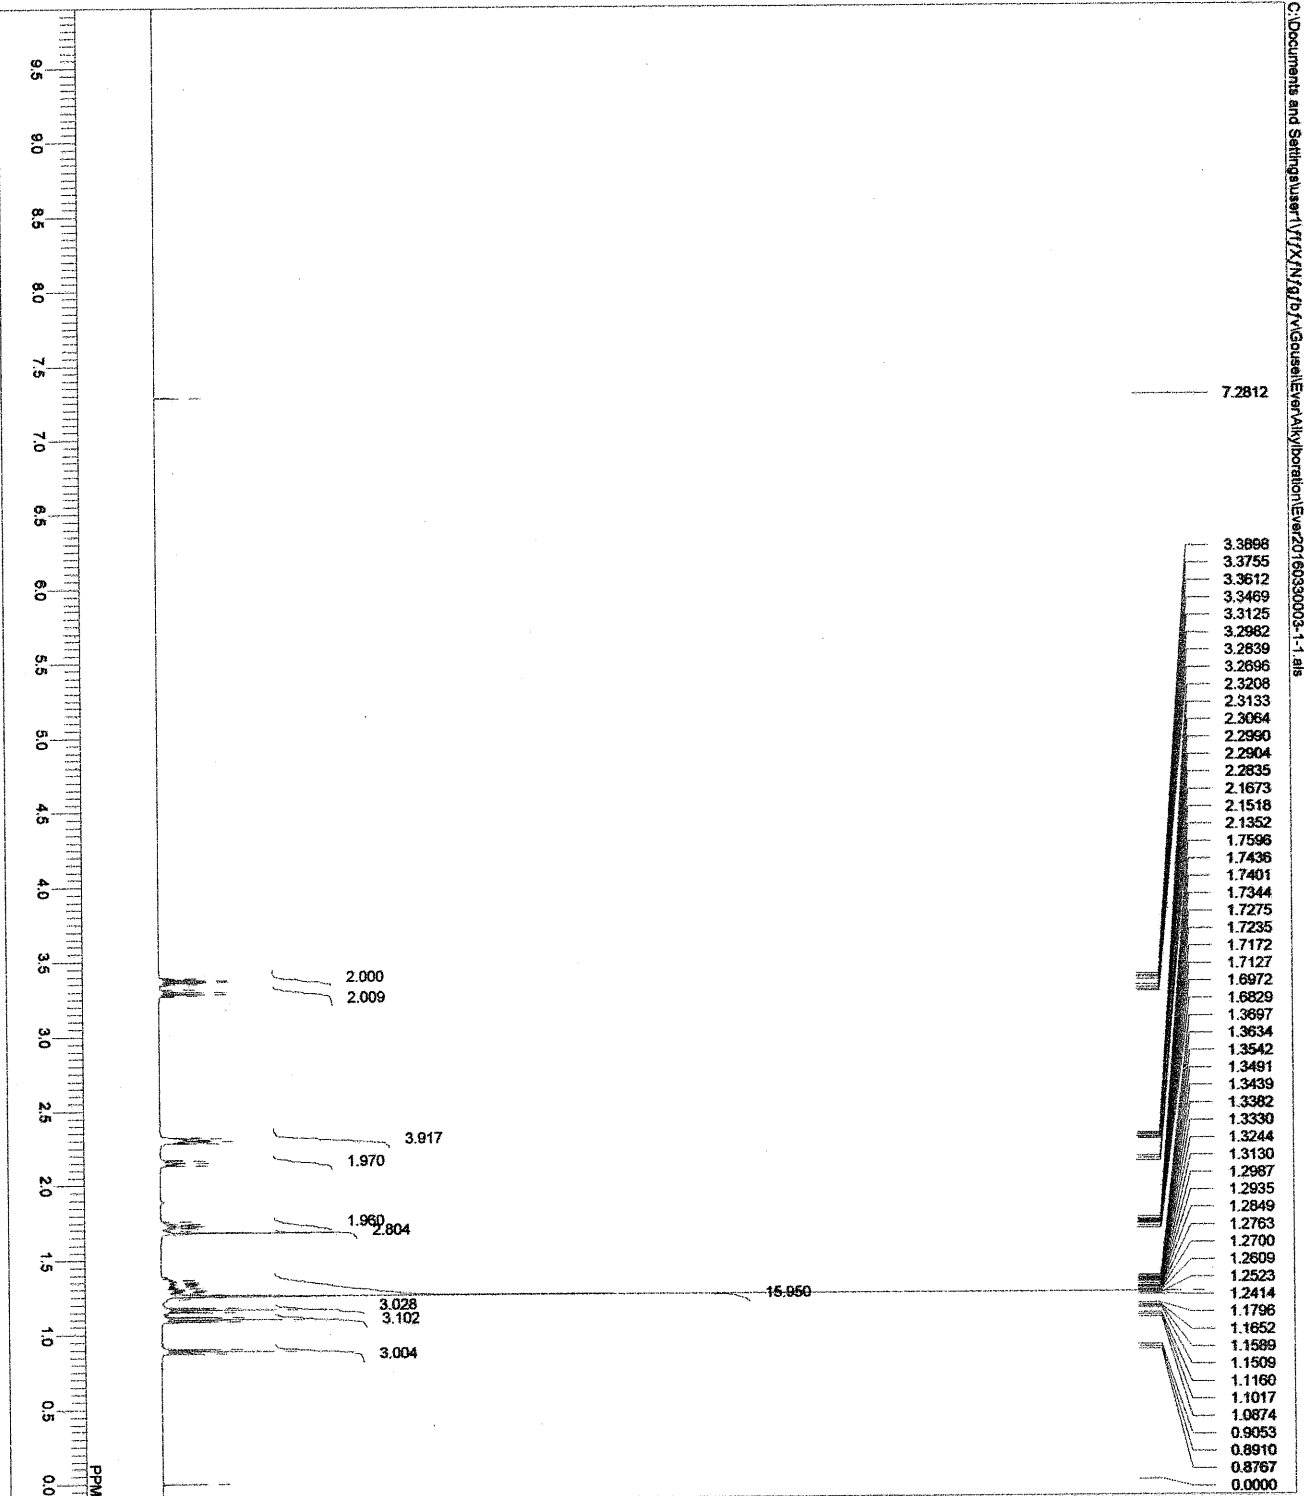

|        |                       |
|--------|-----------------------|
| DFILE  | Exp201903030003-1-1.a |
| COMPT  | No.2858 FT-9          |
| DATE   | 2019-03-30 15:52:54   |
| ORIGIN | 1H                    |
| EXMOD  | proton16              |
| QREFC  | 500.16 MHz            |
| QBSF   | 2.41 KHz              |
| QBSIN  | 6.01 Hz               |
| POINT  | 262.61                |
| FREQU  | 750.51 Hz             |
| SCANS  | 8                     |
| ACQTMM | 1.7459 sec            |
| PD     | 5.0000 sec            |
| PW1    | 5.55 usec             |
| IRNUC  | 1H                    |
| CTEMP  | 32.7 c                |
| SOLVT  | CDCl <sub>3</sub>     |
| EXREF  | 0.00 ppm              |
| BF     | 0.12 Hz               |
| RGAIN  | 24                    |

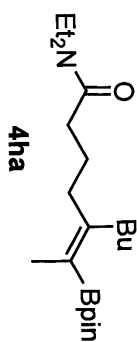

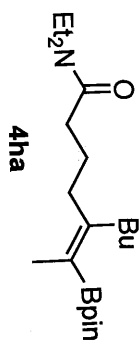

C:\Documents and Settings\user1\My Documents\EverAlky\borallon\eva20160330004-1-1.als

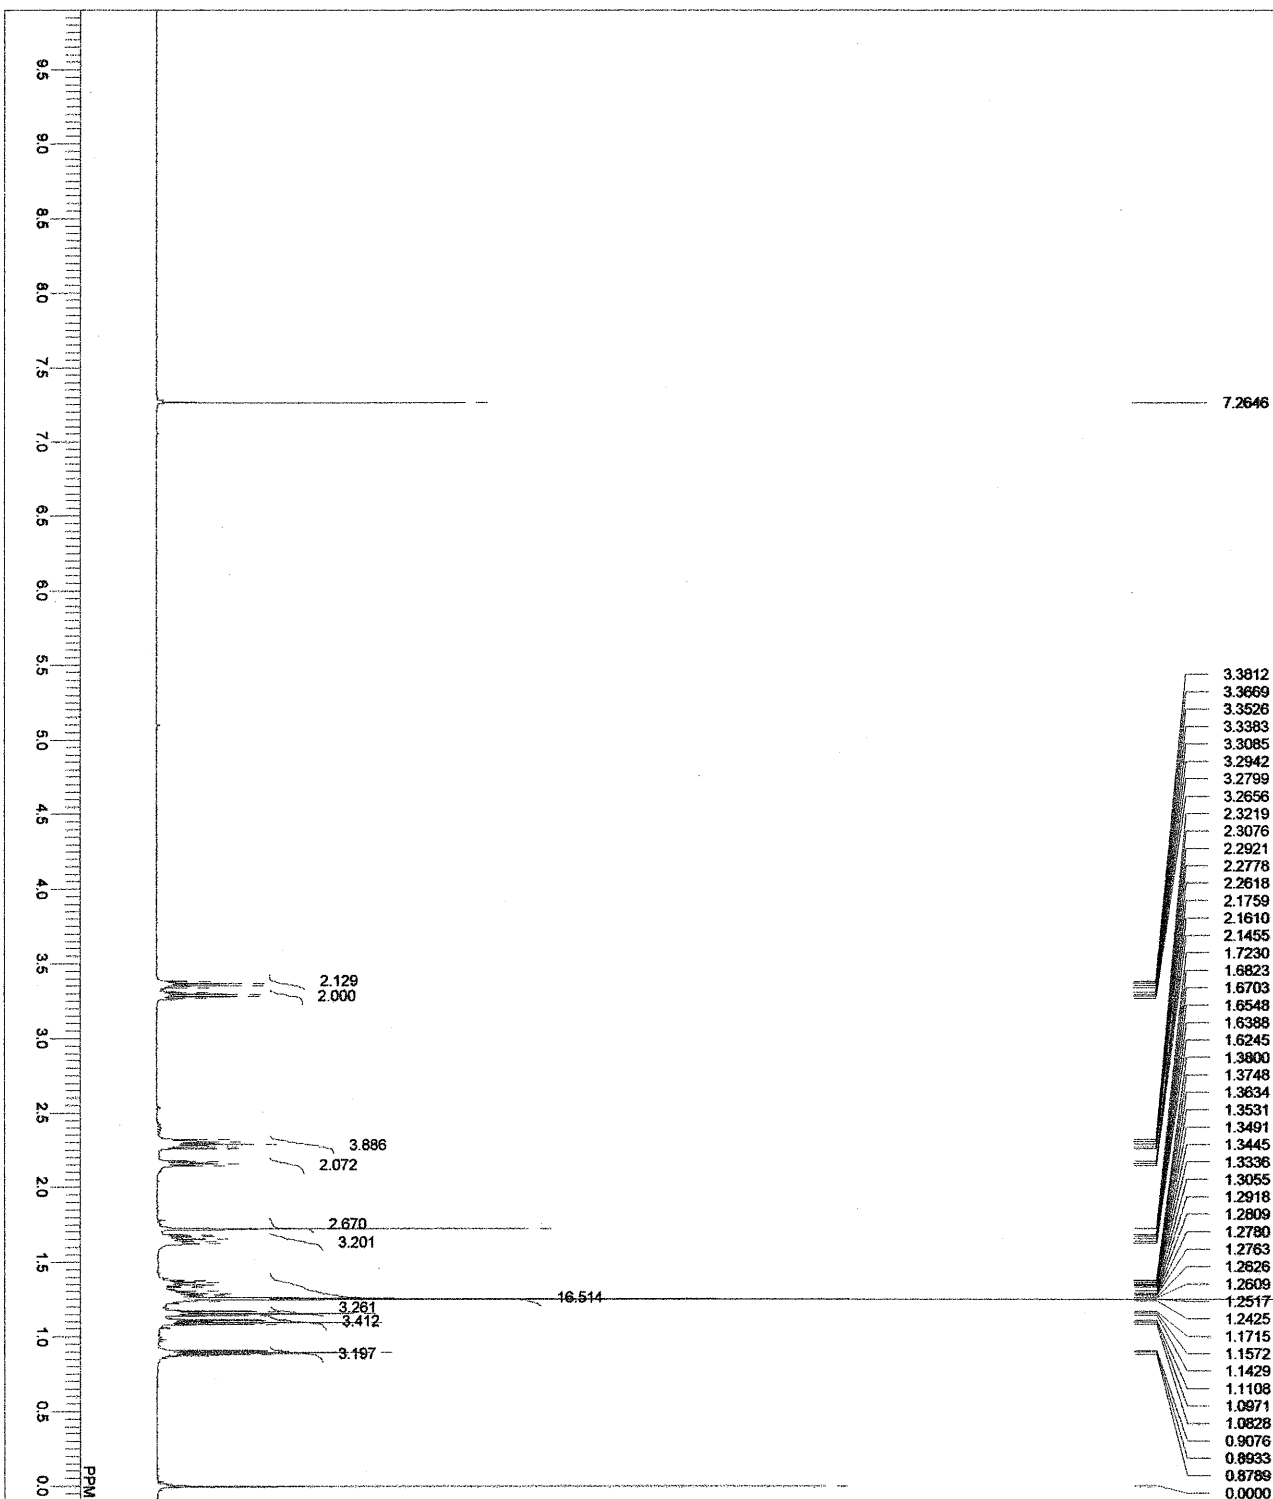

DFILE Ever20160330004-1-1.als  
 COMMENT No.2858 F11  
 DATIM 2016-03-30 15:56:21  
 OBNUC 1H  
 EXINCD proton, hcp  
 OBFREQ 500.16 MHz  
 OBSSET 2.41 KHz  
 OBFIN 6.01 Hz  
 POINT 28214  
 FREQU 7507.51 Hz  
 SCANS 8  
 ACQTM 1.7459 sec  
 PD 5.0000 sec  
 PVI 5.55 usec  
 IRLUC 1H  
 CTMP 33.0 C  
 SLVNT CDCL3  
 EXREF 0.00 ppm  
 BF 0.12 Hz  
 RGAIN 30

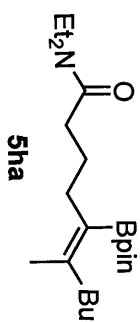

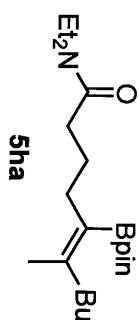

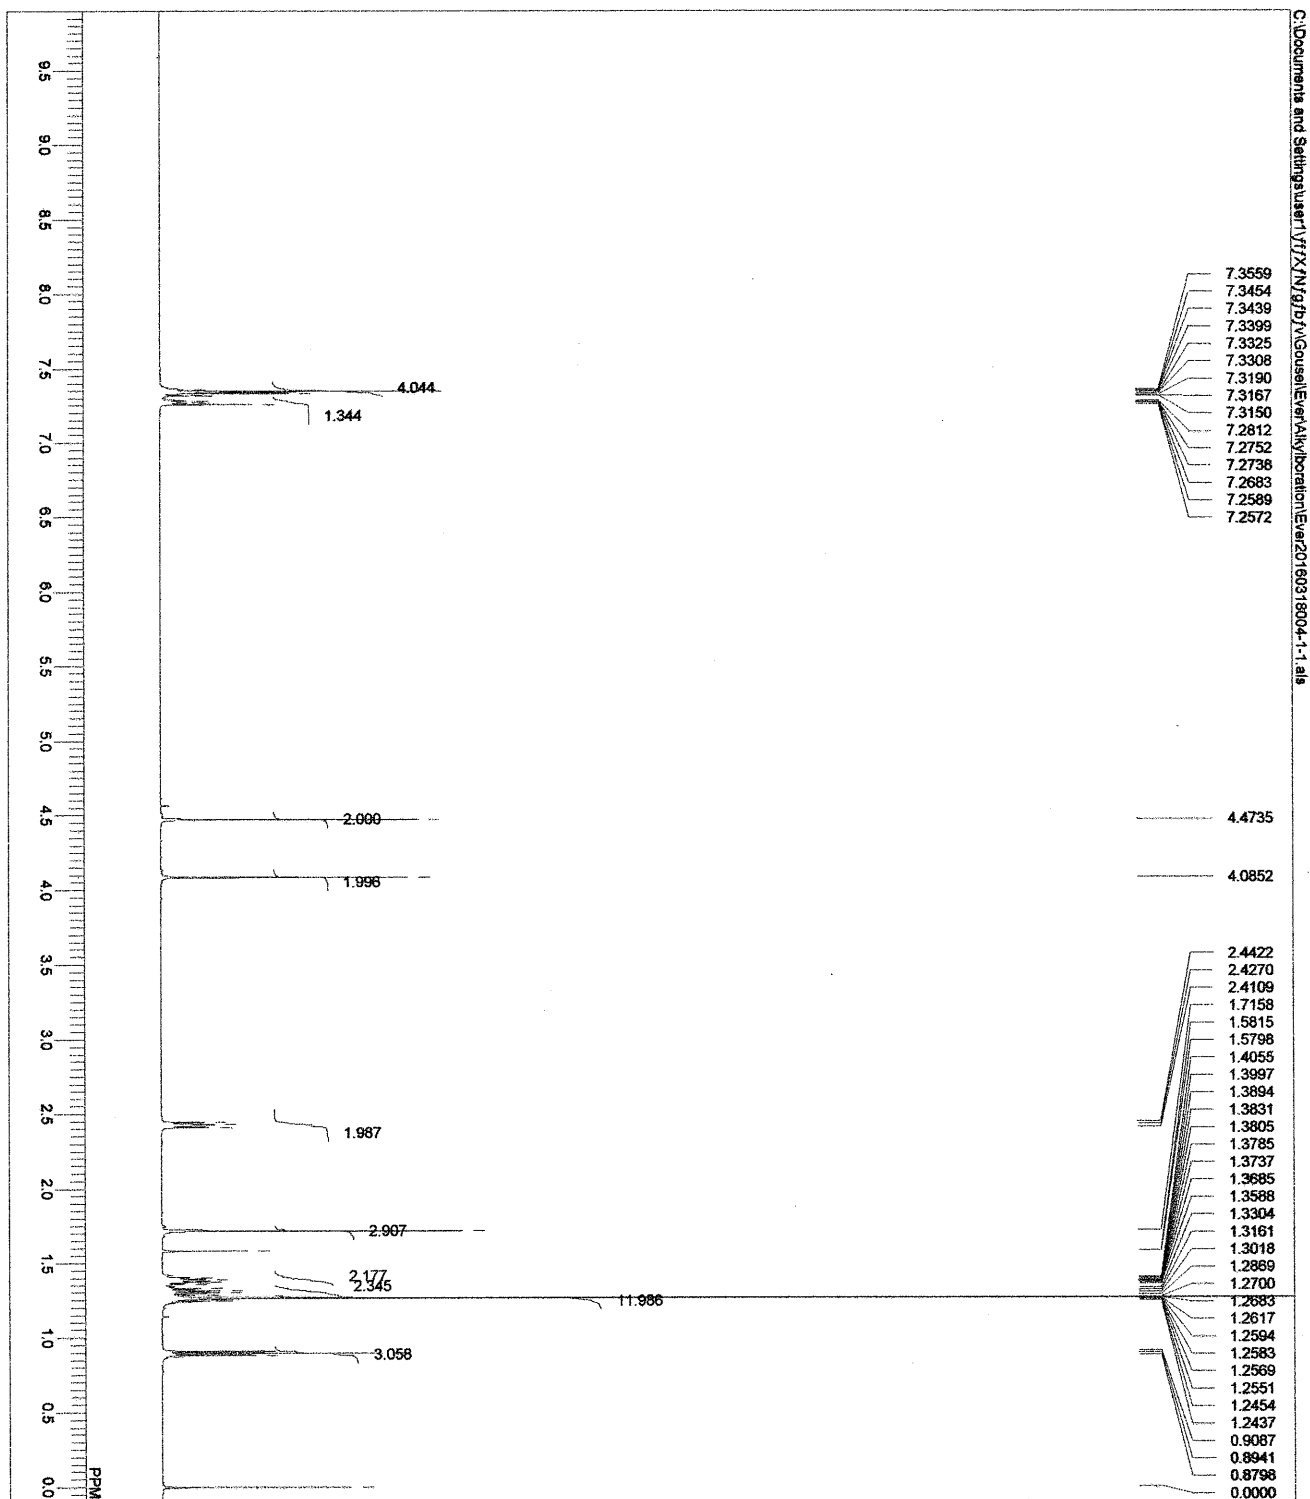

DFILE Ever20160318004-1-1.a1s  
 COUNT No.2824  
 DATIM 2016-03-18 16:09:45  
 OBNUC 1H  
 EXMOD proton, xpr  
 OBFRO 500.16 MHz  
 OBSER 2.41 KHz  
 OPRN 6.01 Hz  
 POINT 52428  
 FREQU 7507.51 Hz  
 SCANS 8  
 ACQTM 1.7459 sec  
 PD 5.0000 sec  
 PUL1 5.55 usec  
 IRNUC 1H  
 CTMP 33.5 c  
 SLVNT CDCL3  
 EXREF 0.00 ppm  
 BE 0.12 Hz  
 RGAIN 30

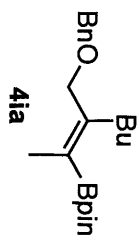

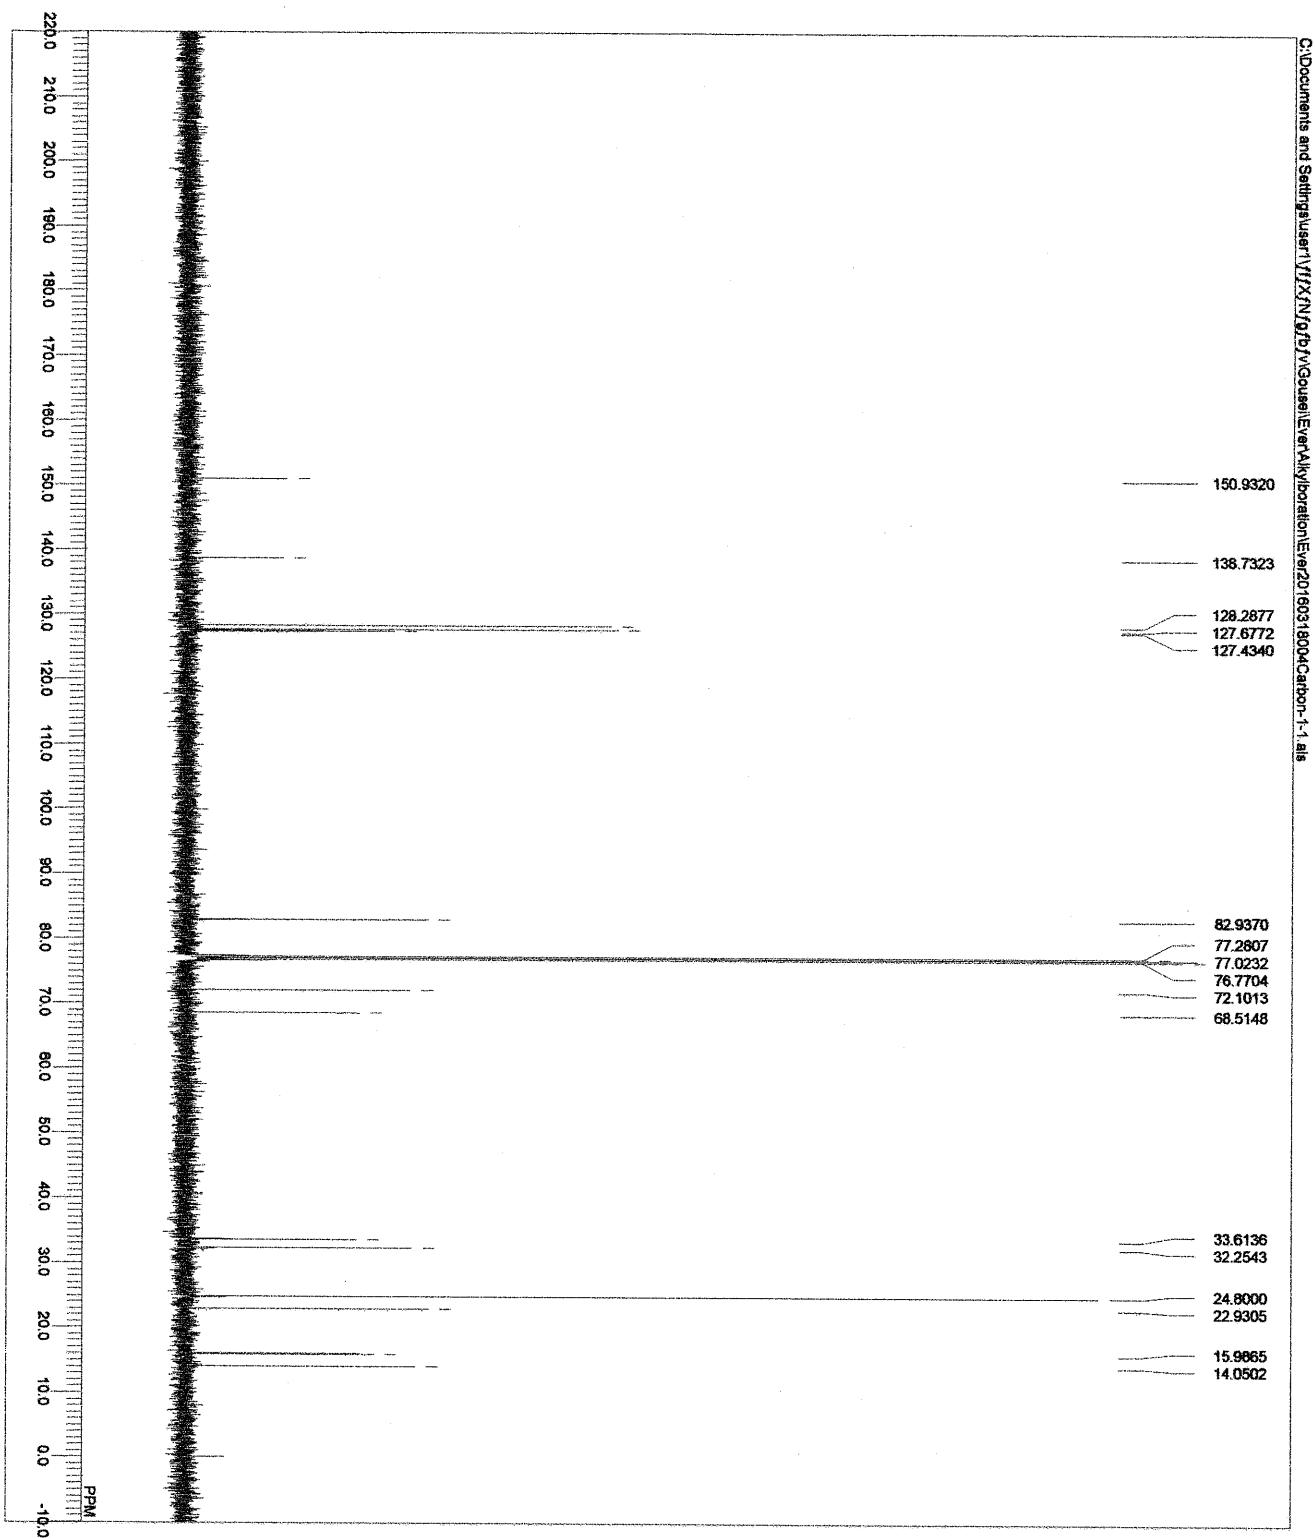

D:\FILE Ever20180318004Carbon-1-1.a1s  
 COUNT No.2824 Carbon  
 DATIM 2018-03-18 18:11:15  
 OBNULC 13C  
 EXMAD carbon.jpg  
 OFFRQ 125.77 MHz  
 OBSET 7.87 KHz  
 OFBIN 4.21 Hz  
 POINT 52428  
 FREQU 31446.54 Hz  
 SCANS 68  
 ACQTM 0.8338 sec  
 PD 2.0000 sec  
 PW1 3.40 usec  
 IRNUC 1H  
 CTEMP 32.6 c  
 SLVNT CDCl3  
 EXREF 0.00 ppm  
 BF 1.20 Hz  
 RGAIN 60

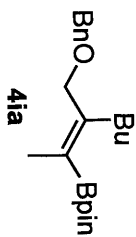

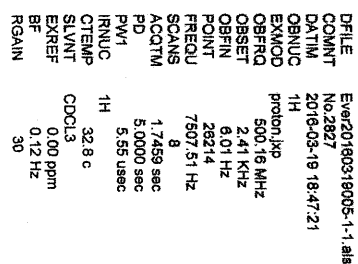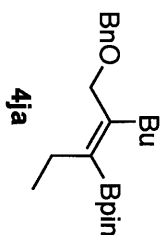



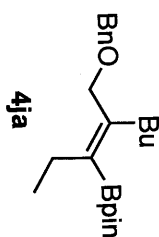

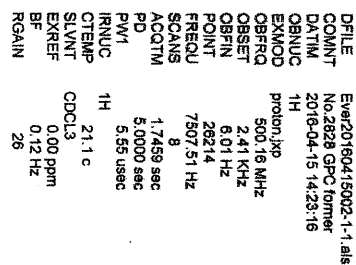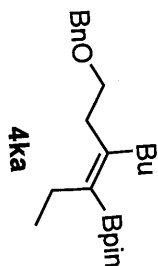

C:\Documents and Settings\user1\My Documents\Goussier\EverAlly\boration\Ever20180415002Carbon-1-1.a1s

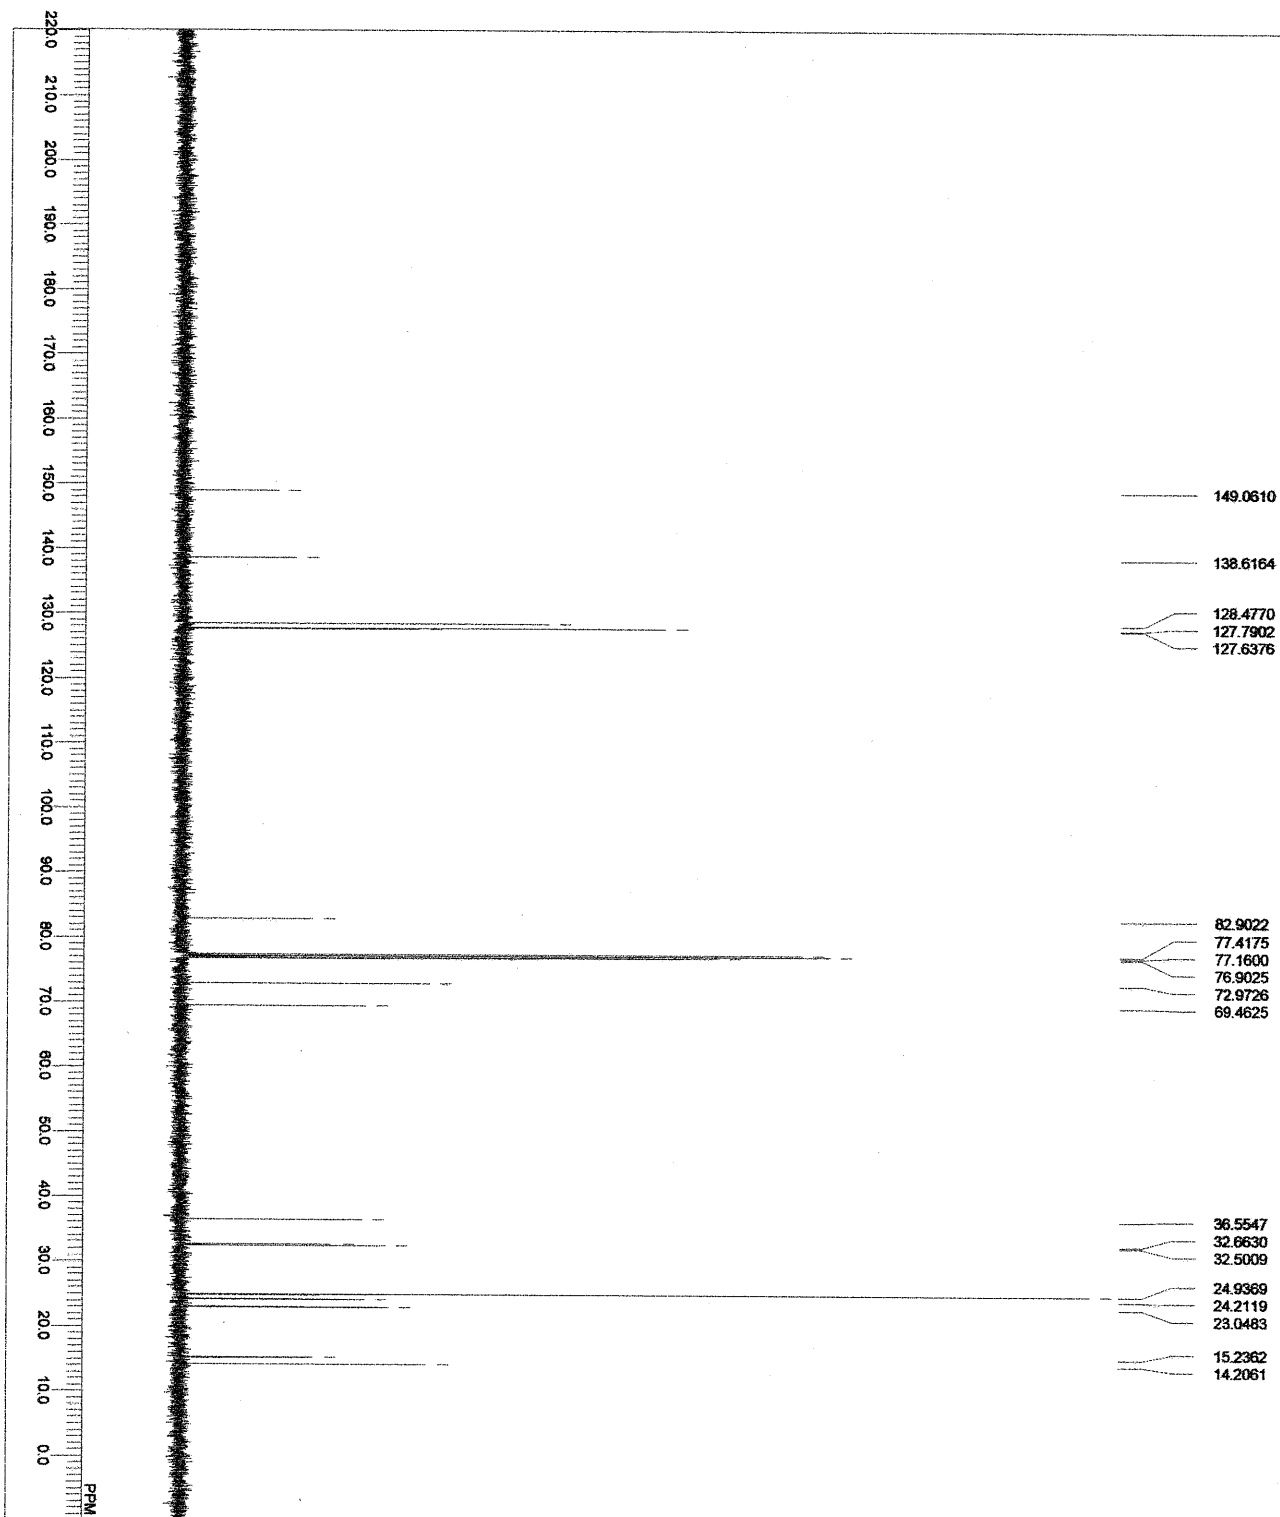

D:\FILE Ever20180415002Carbon-1-1.a1s  
 COUNT No.2828 GPC former Carbon  
 DATIM 2018-04-15 14:24:46  
 OBNUC 13C  
 EXMAD carbon\_1.p  
 OFFRQ 125.77 MHz  
 OBSET 7.87 KHz  
 OFFIN 4.21 Hz  
 POINT 28214  
 FREQU 31440.64 Hz  
 SCANS 77  
 ACQTM 0.8338 sec  
 PD 2.0000 sec  
 PW1 3.40 usec  
 IRNUC 1H  
 CTEMP 21.5 c  
 SLYNT CDCL3  
 EXREF 77.16 ppm  
 BF 0.62 Hz  
 RGAIN 60

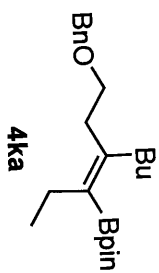

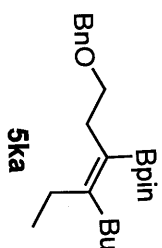

C:\Documents and Settings\user1\My Documents\WGC\user1\EvenAllylboration\Even20160415003Carbon-1-1.als

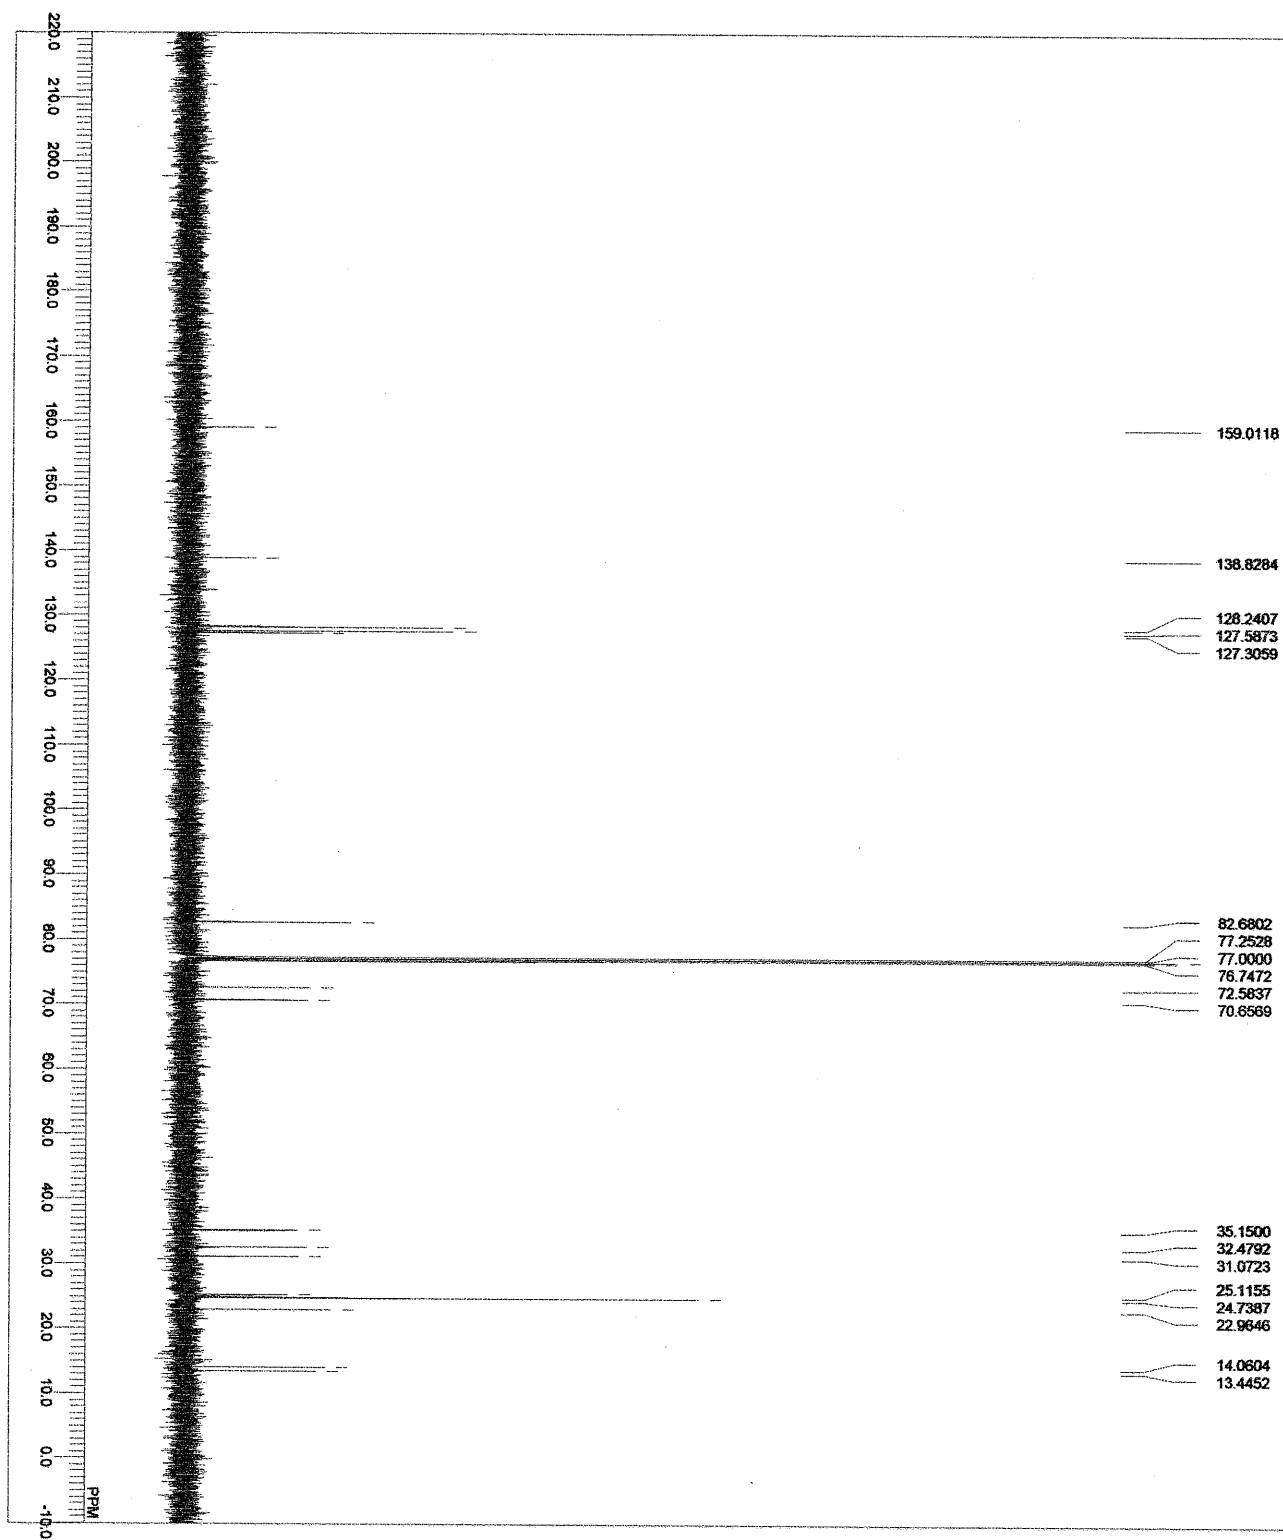

D:\FILE Even20160415003Carbon-1-1.als  
 COMMENT No.2828 GPC latter Carbon  
 DATIM 2016-04-15 15:11:13  
 OBNUC 13C  
 EXMOD carbon, 13C  
 OBFREQ 125.77 MHz  
 OBSSET 7.87 KHz  
 OBSFIN 4.21 Hz  
 POINT 52428  
 FREQSU 31446.64 Hz  
 SCANS 78  
 ACQTM 0.8336 sec  
 PD 2.0000 sec  
 PW1 3.40 usec  
 1H  
 IRNUC 21.2 C  
 CTEMP CDCL3  
 SLVNT 77.00 ppm  
 EXREF 0.82 Hz  
 BF 80  
 RGAIN

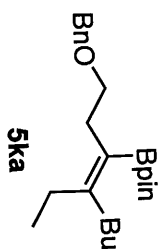

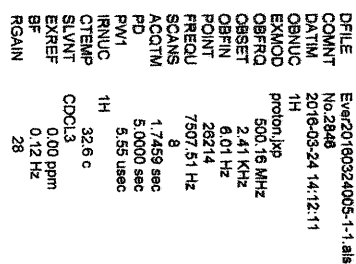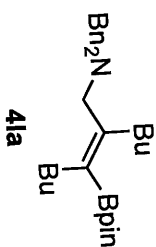

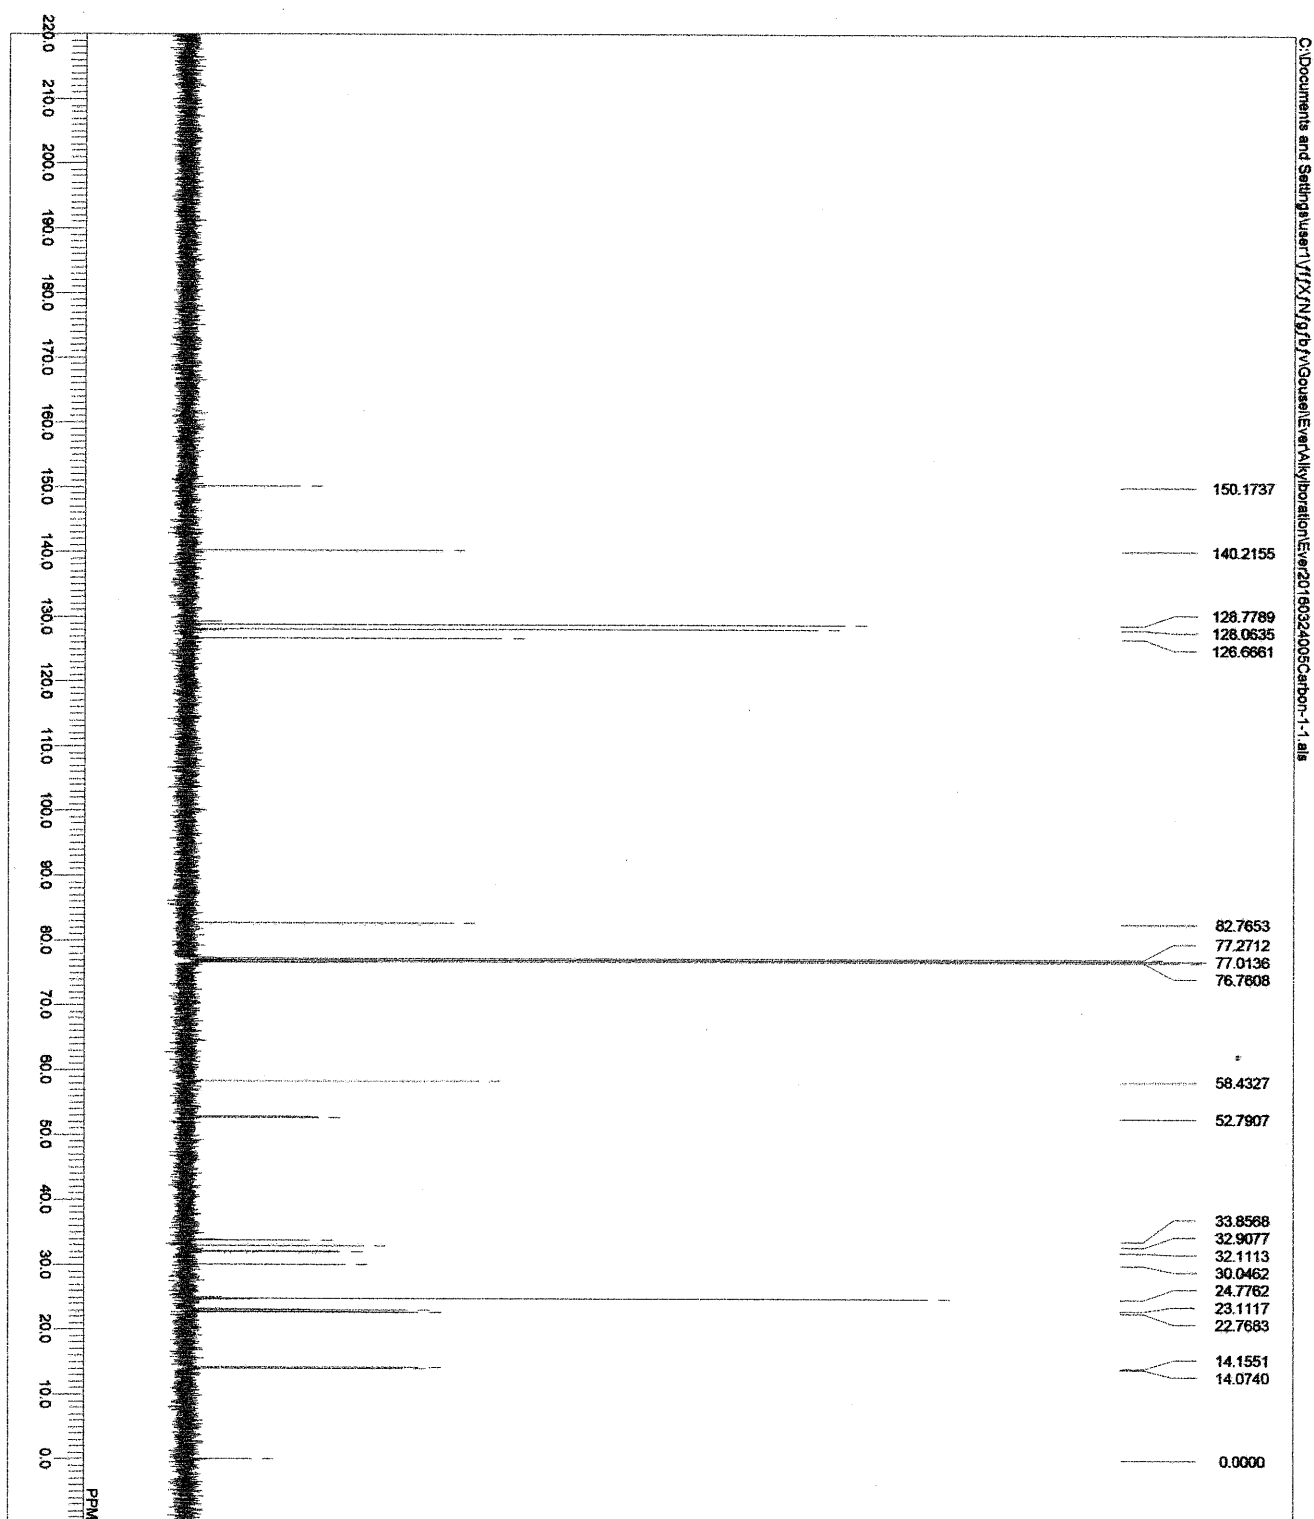

D:\FILE Ever20160324005Carbon-1-1.aie  
 COMINT No. 2846 Carbon  
 DATM 2016-03-24 14:13:40  
 OBNUC 13C  
 EXMCD carbon 13p  
 OBERQ 125.77 MHz  
 OBSER 7.67 KHz  
 OBSIN 4.21 Hz  
 POINT 52428  
 FREQU 31446.54 Hz  
 SCANS 128  
 ACQTM 0.8336 sec  
 PD 2.0000 sec  
 PW1 3.40 usec  
 1H  
 IRNUC 32.7 c  
 CTMP  
 SLYNT CDCl3  
 EXREF 0.00 ppm  
 BF 0.02 Hz  
 RGAIN 60

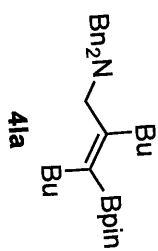

C:\Documents and Settings\user1\Y\X\N\gfb\W\Goussell\EverAlkyboration\Ewa20160802003-1-1.als

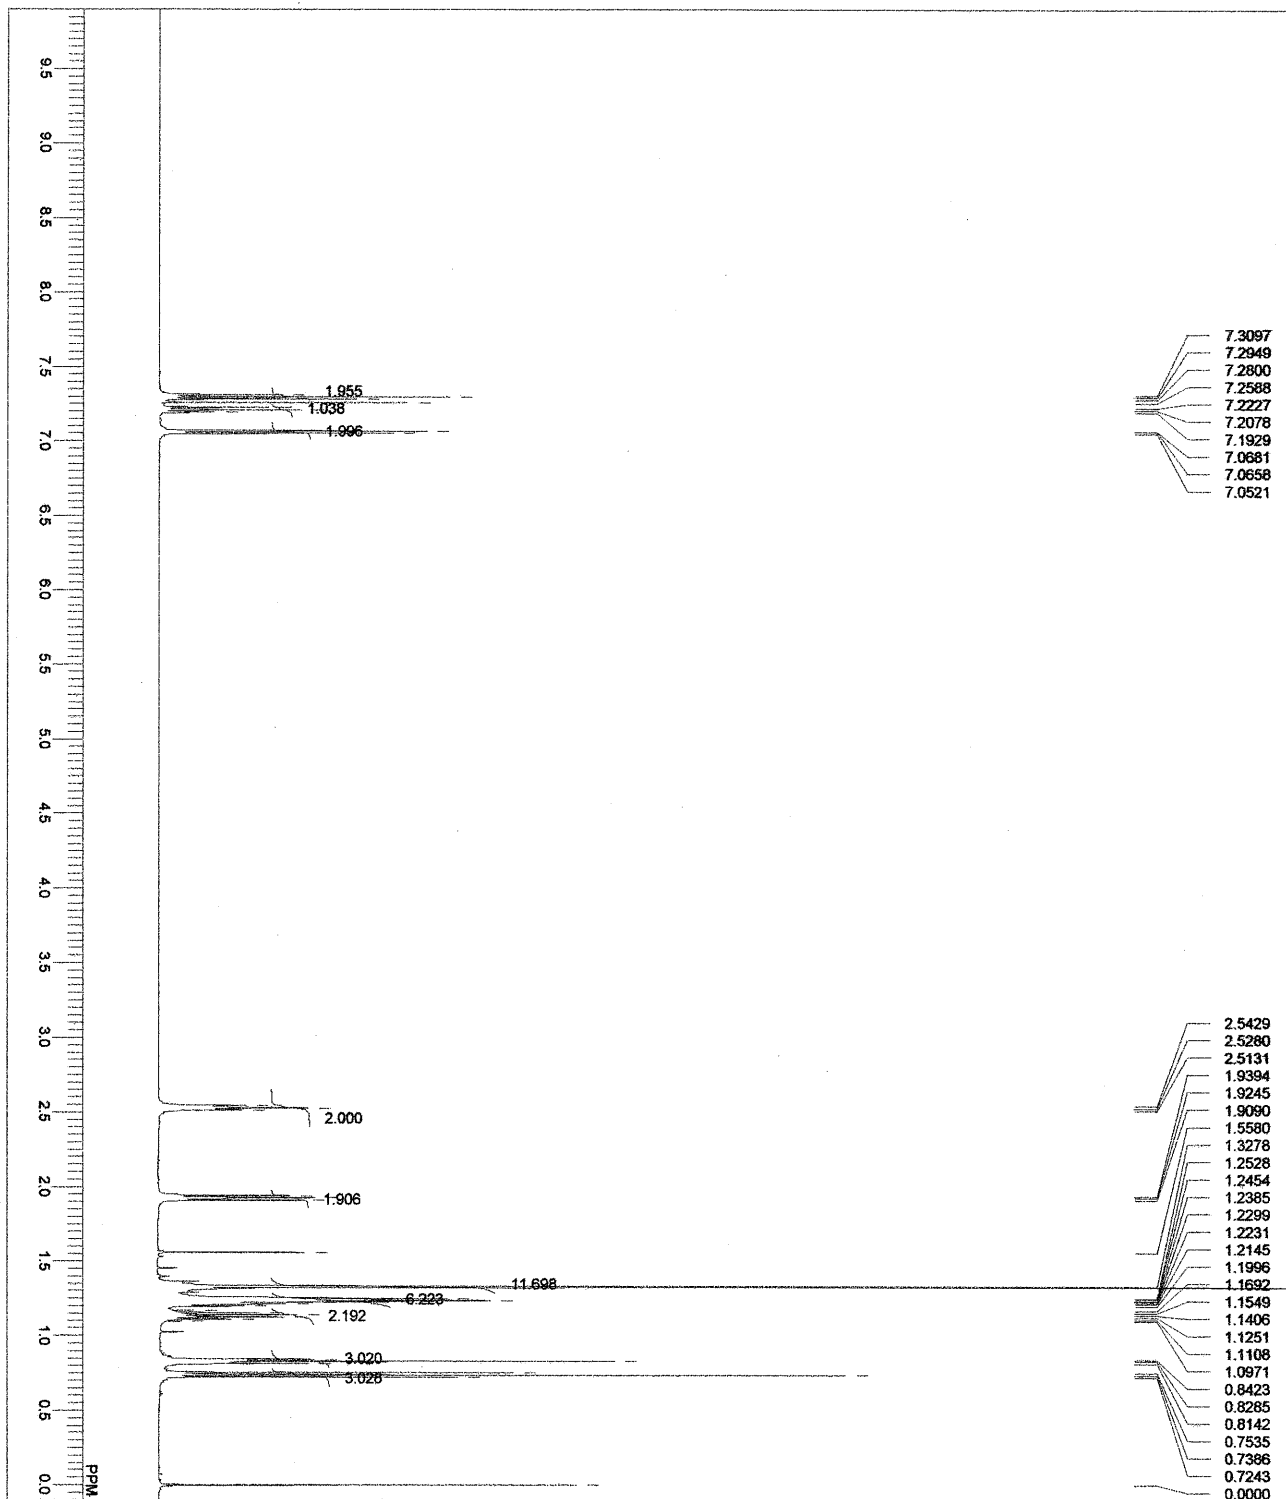

DPLE Ewa20160802003-1-1.als  
 COMMENT No.2829 PTLC F2  
 DATIM 2016-06-02 17:28:46  
 1H  
 EXMCD proton.jpg  
 OBSFQ 500.16 MHz  
 OBSSET 2.41 KHz  
 OBSFIN 6.01 Hz  
 POINT 32767  
 FREOU 9394.38 Hz  
 SCANS 8  
 ACQTM 1.7459 sec  
 PD 5.0000 sec  
 PVI 5.55 usec  
 IRNUC 1H  
 CTMP 21.7 c  
 SLVNT CDCL3  
 EXREF 0.00 ppm  
 BF 0.12 Hz  
 RGAIN 30

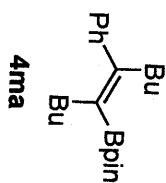



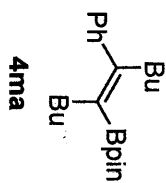

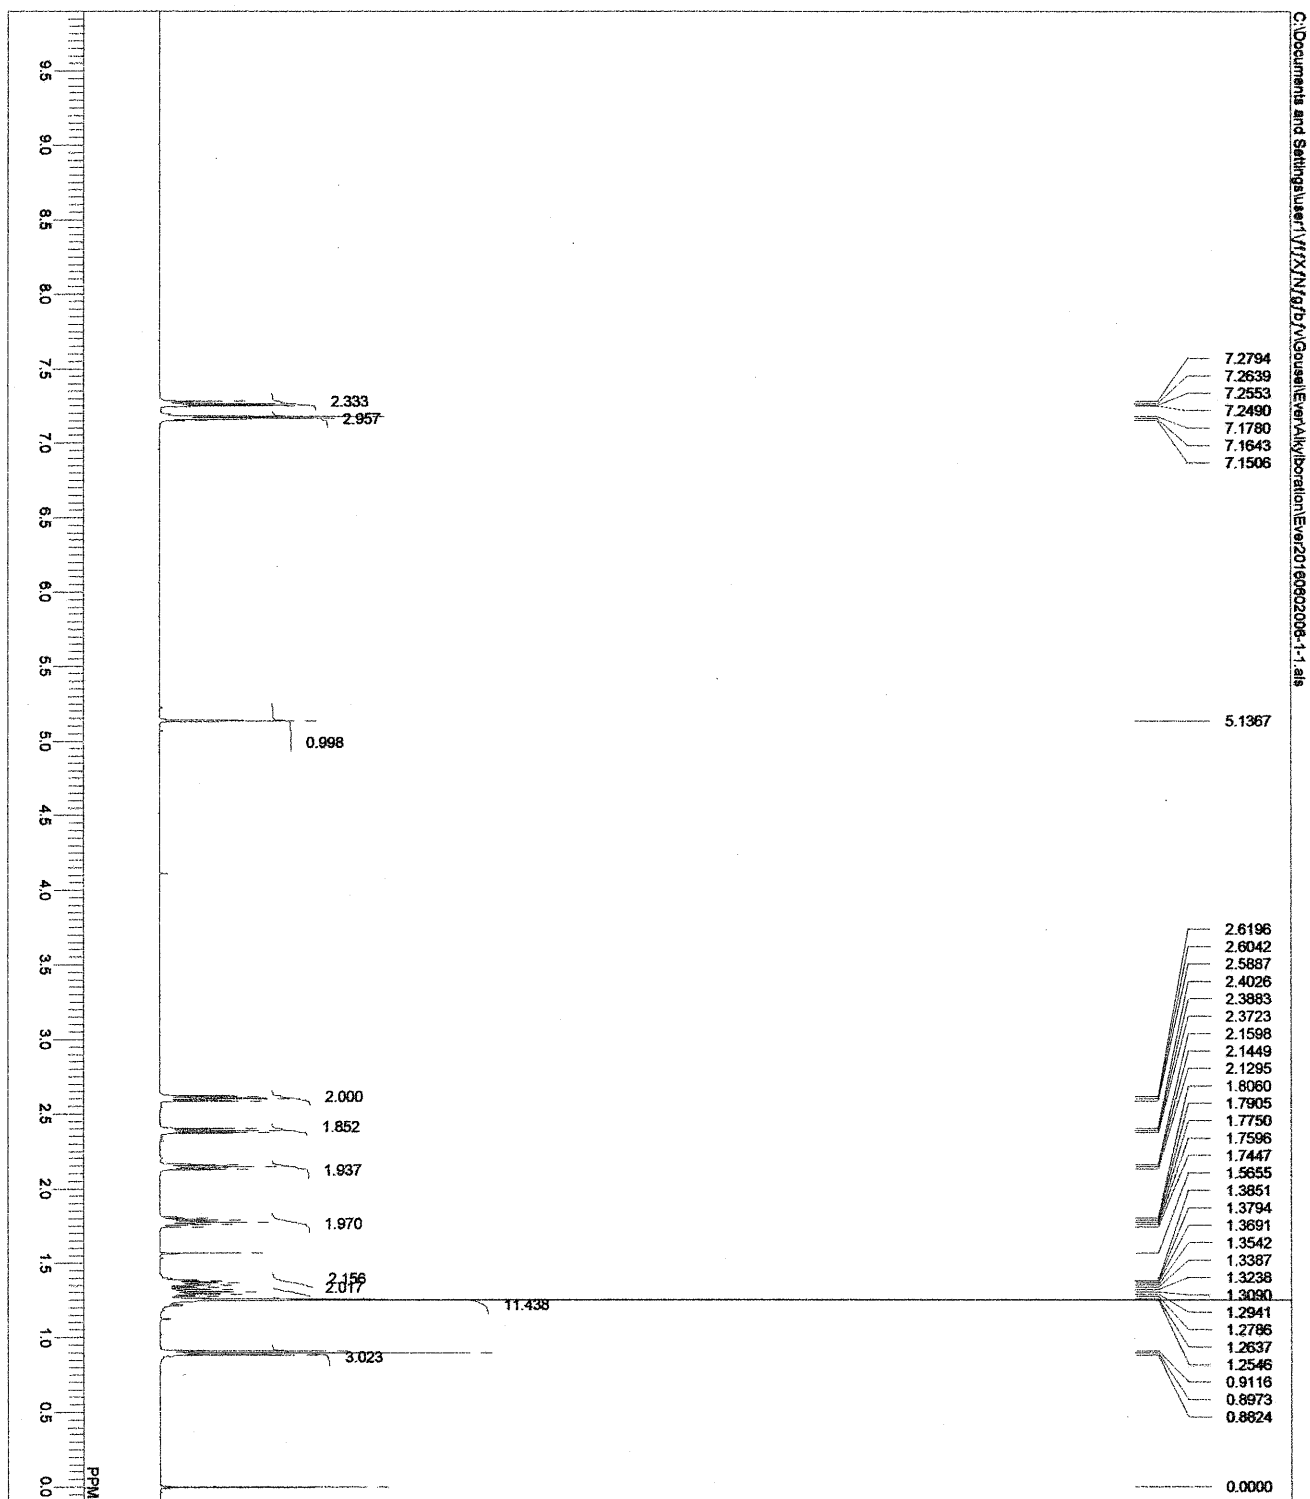

DFILE Ever20160602006-1-1.aif  
 COUNT No.2898 PTLC F2  
 DATIM 2016-06-02 20:52:46  
 1H  
 EXMUC  
 EXMOD proton,1xp  
 OBSFREQ 500.16 MHz  
 OBSSET 2.41 KHz  
 OBSFN 6.01 Hz  
 POINT 32767  
 FREOU 9384.38 Hz  
 SCANS 8  
 ACQTM 1.7459 sec  
 PD 5.0000 sec  
 PW1 5.55 usec  
 1H  
 IRNUC 216 c  
 CTEMP CDCL3  
 SLVNT 0.00 ppm  
 EXREF 0.12 Hz  
 BF 30  
 RGAIN

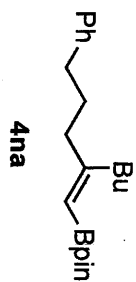

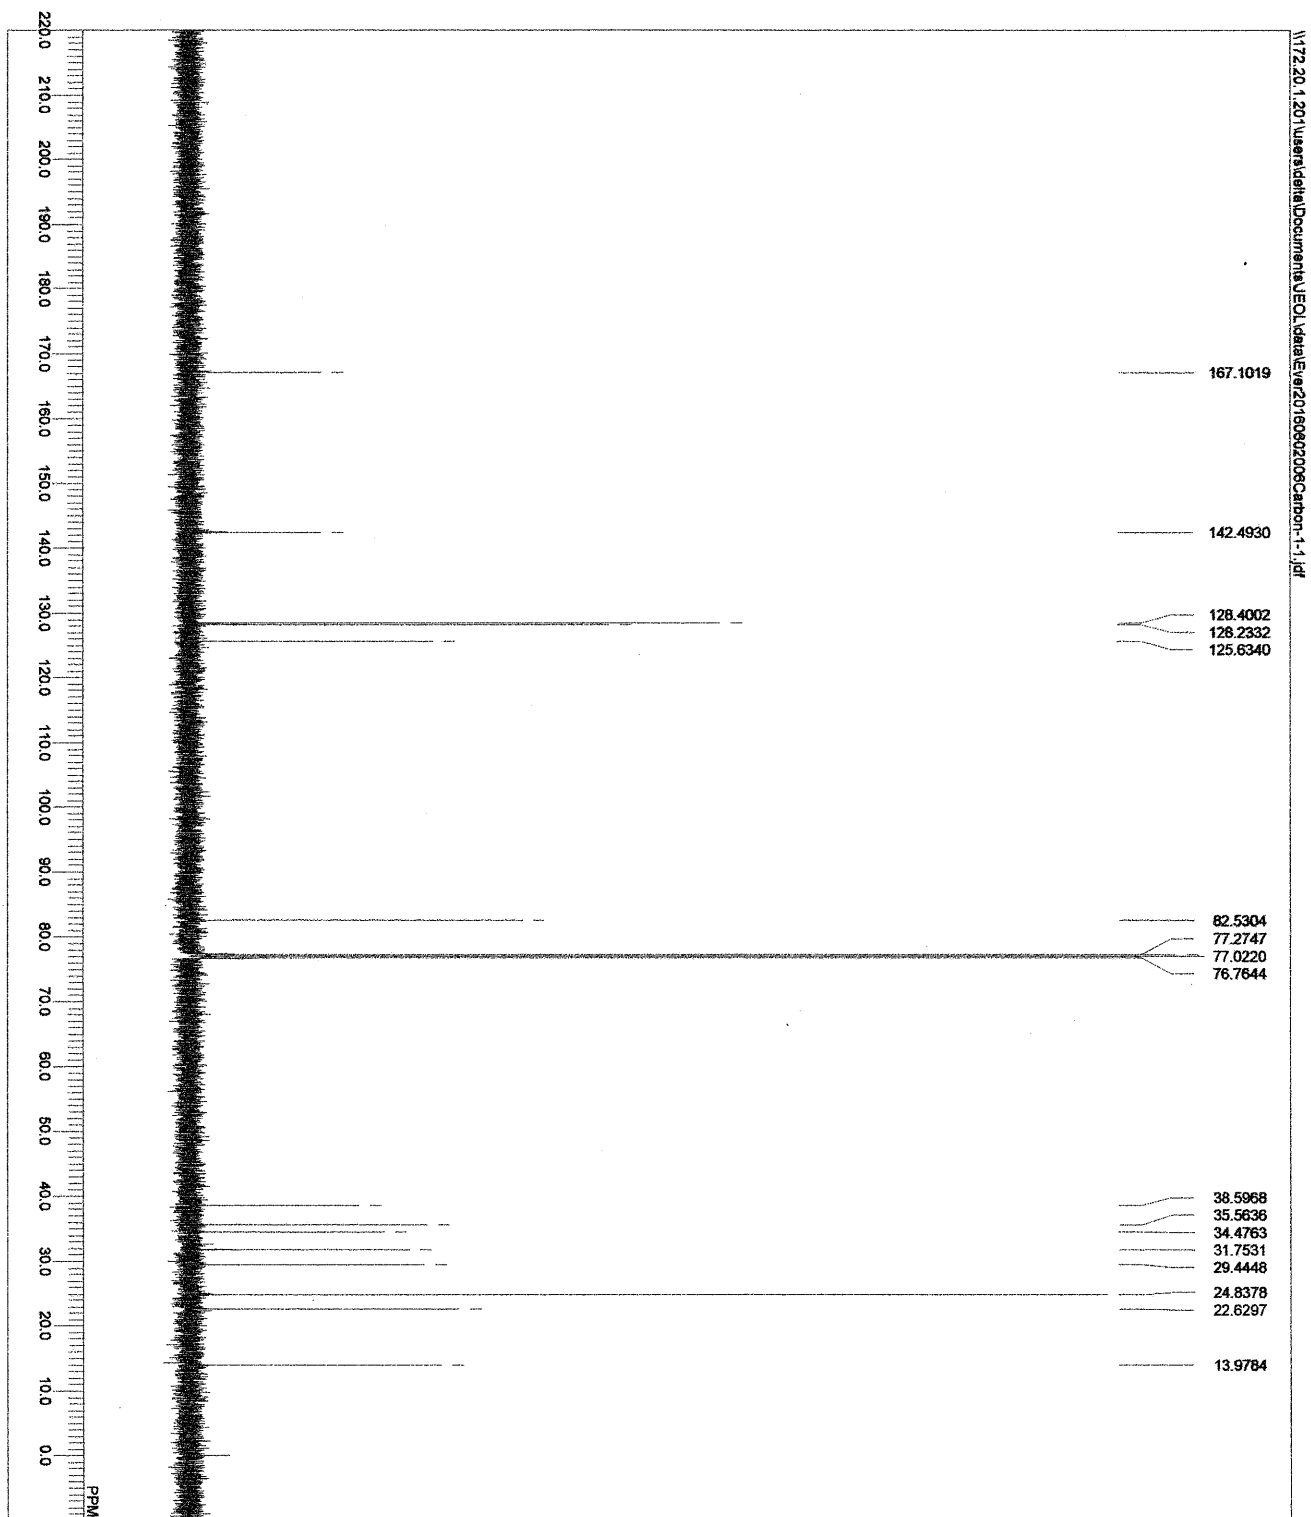

FILE Evt20160902006Carbon-1-1.jdt  
 COMNT No.2898 PTL C F2 Carbon  
 DATIM 2016-08-02 20:54:18  
 OBNUC 13C  
 EXMOD carbon\_jcp  
 OBFRQ 125.77 MHz  
 OBSST 7.87 KHz  
 OBSFN 4.21 Hz  
 POINT 65535  
 FREQU 39308.18 Hz  
 SCANS 92  
 ACQTM 0.8336 sec  
 PD 2.0000 sec  
 PW1 3.40 usec  
 IRNUC 1H  
 CTMP 21.8 c  
 CDCL3 0.00 ppm  
 EXREF 0.52 Hz  
 BF 60  
 RGAIN

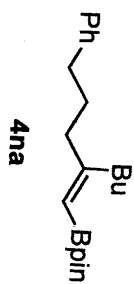

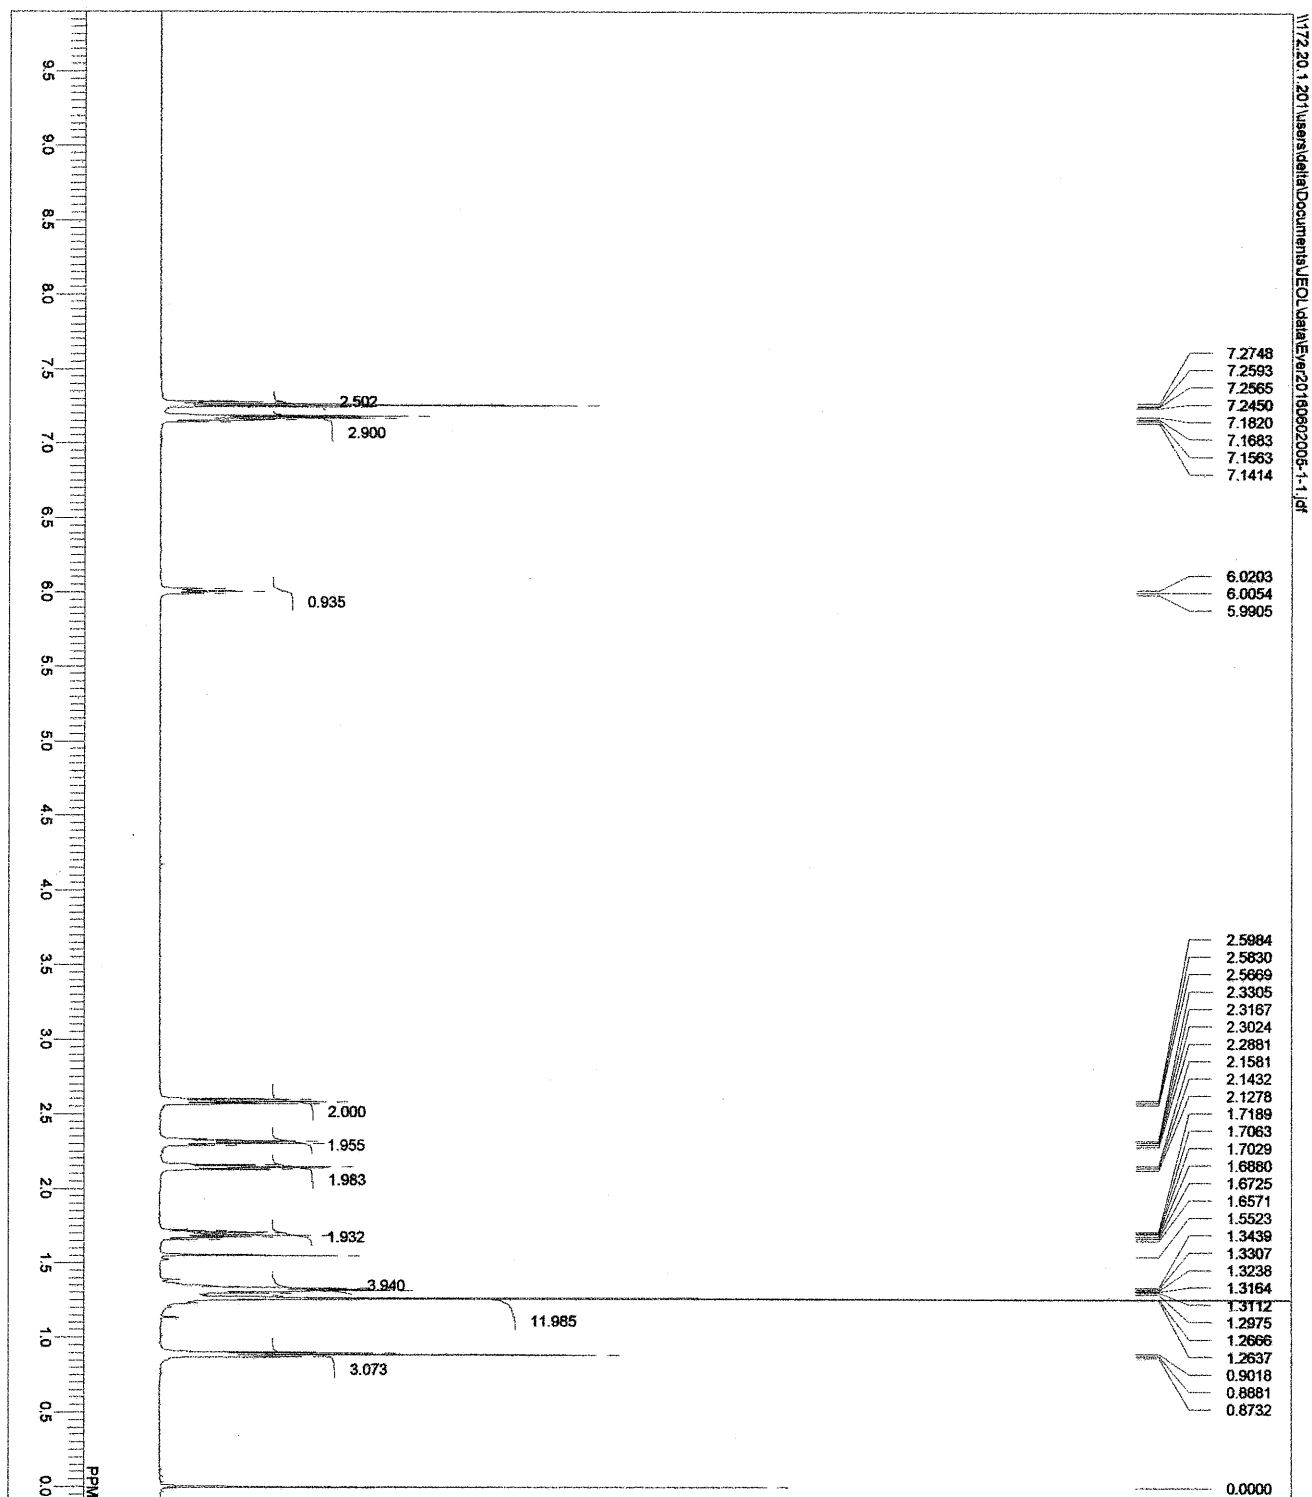

DFILE E:\20160602005-1-1.jdt  
 COMNT No.2998 PTLC F1  
 DATM 2016-06-02 21:00:50  
 OBNJC 1H  
 EXMOD  
 OBSFRQ 500.16 MHz  
 OBSSET 2.41 KHz  
 OBSFIN 6.01 Hz  
 POINT 32767  
 FREQU 9384.38 Hz  
 SCANS 8  
 ACQTM 1.7459 sec  
 PD 5.0000 sec  
 PW1 5.55 usec  
 IRNUC 1H  
 CTEMP 21.6 c  
 SLVNT CDCl<sub>3</sub>  
 EXREF 0.00 ppm  
 BF 0.12 Hz  
 RGAIN 30

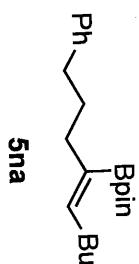

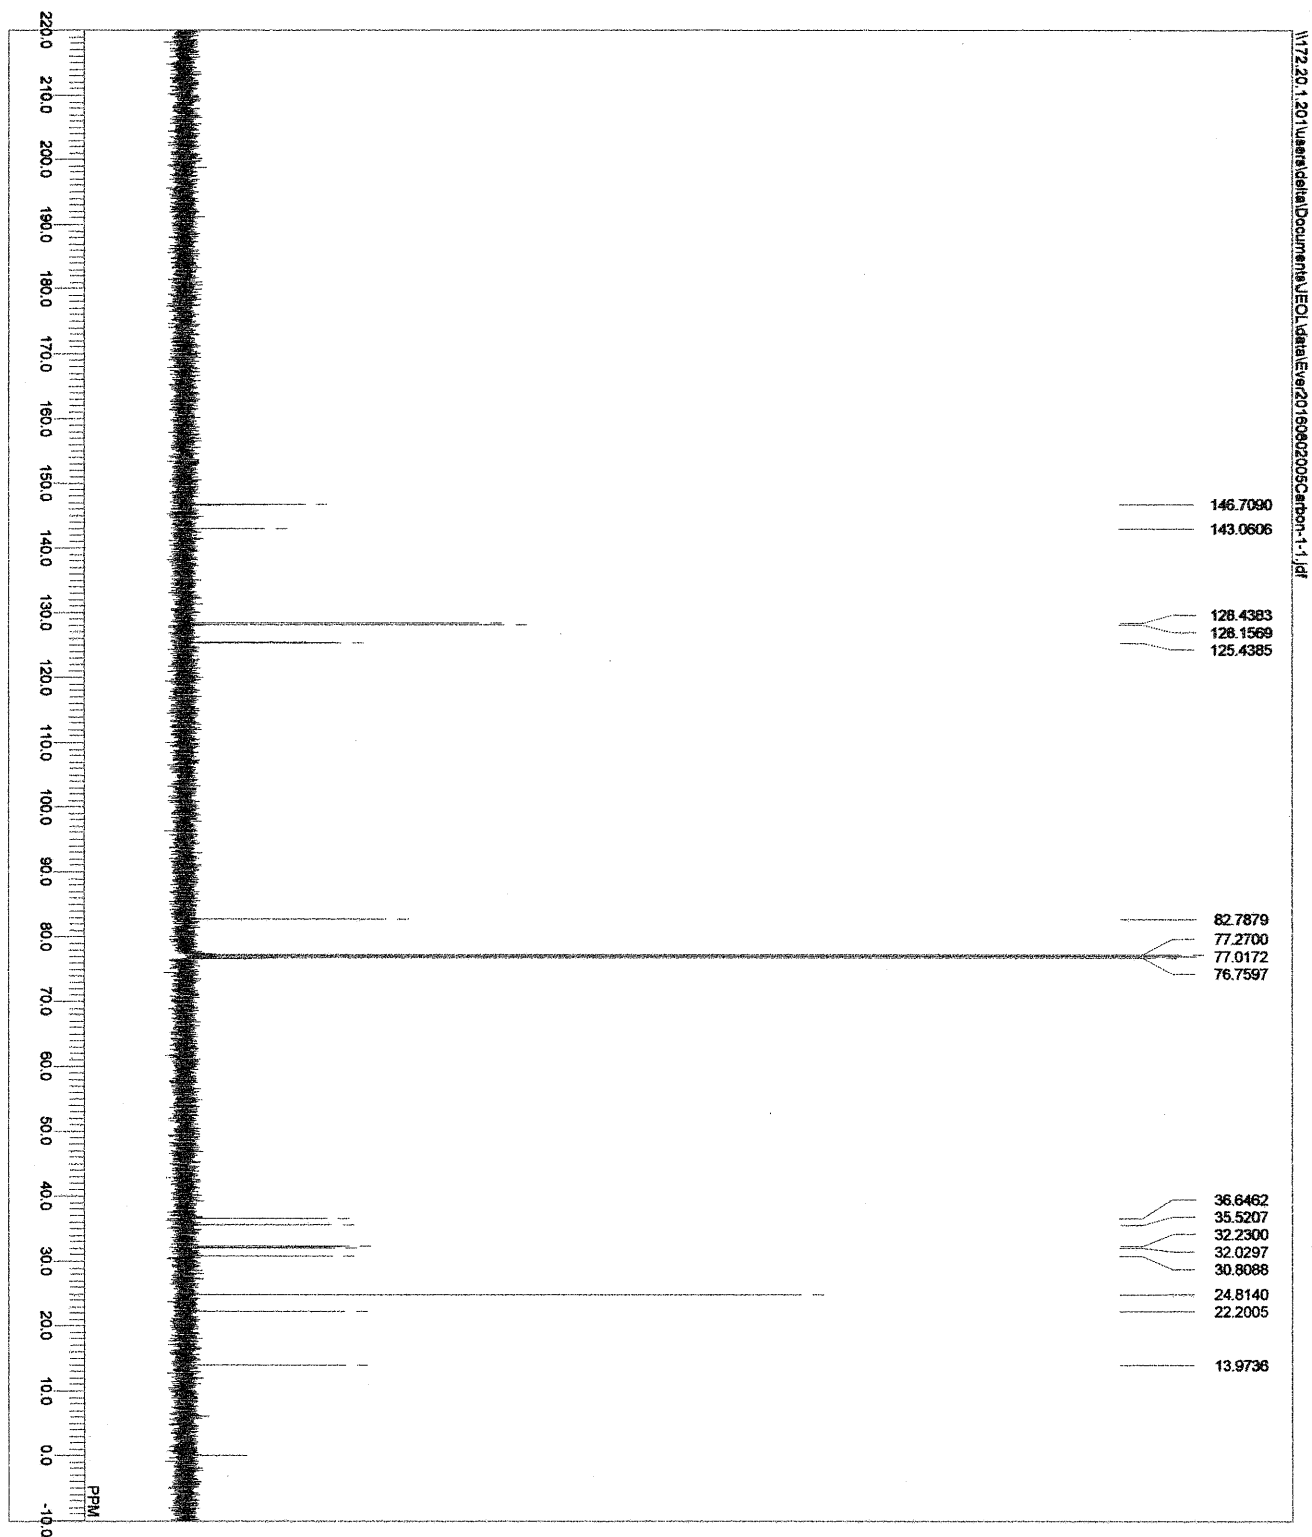

D:\FILE Ever20160802005Carbon-1-1.jdt  
 COUNT No.2998 PTLG F1 Carbon  
 DATIM 2016-06-02 21:02:20  
 OBNUC 13C  
 EXMOD carbon.jpg  
 OBFRO 125.77 MHz  
 OBSRT 7.87 KHz  
 OBFIN 4.21 Hz  
 POINT 65535  
 FRECU 39906.18 Hz  
 SCANS 128  
 ACQTM 0.8336 sec  
 PD 2.0000 sec  
 PW1 3.40 usec  
 IRNUC 1H  
 CTEMP 21.7 c  
 SLVNT CDCl3  
 EXREF 0.00 ppm  
 BF 0.52 Hz  
 RGAIN 60

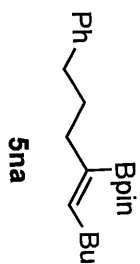

C:\Documents and Settings\user1\My Documents\NMR\Gaussi\EverAlky\boration\Ever20160405004-1-1.als

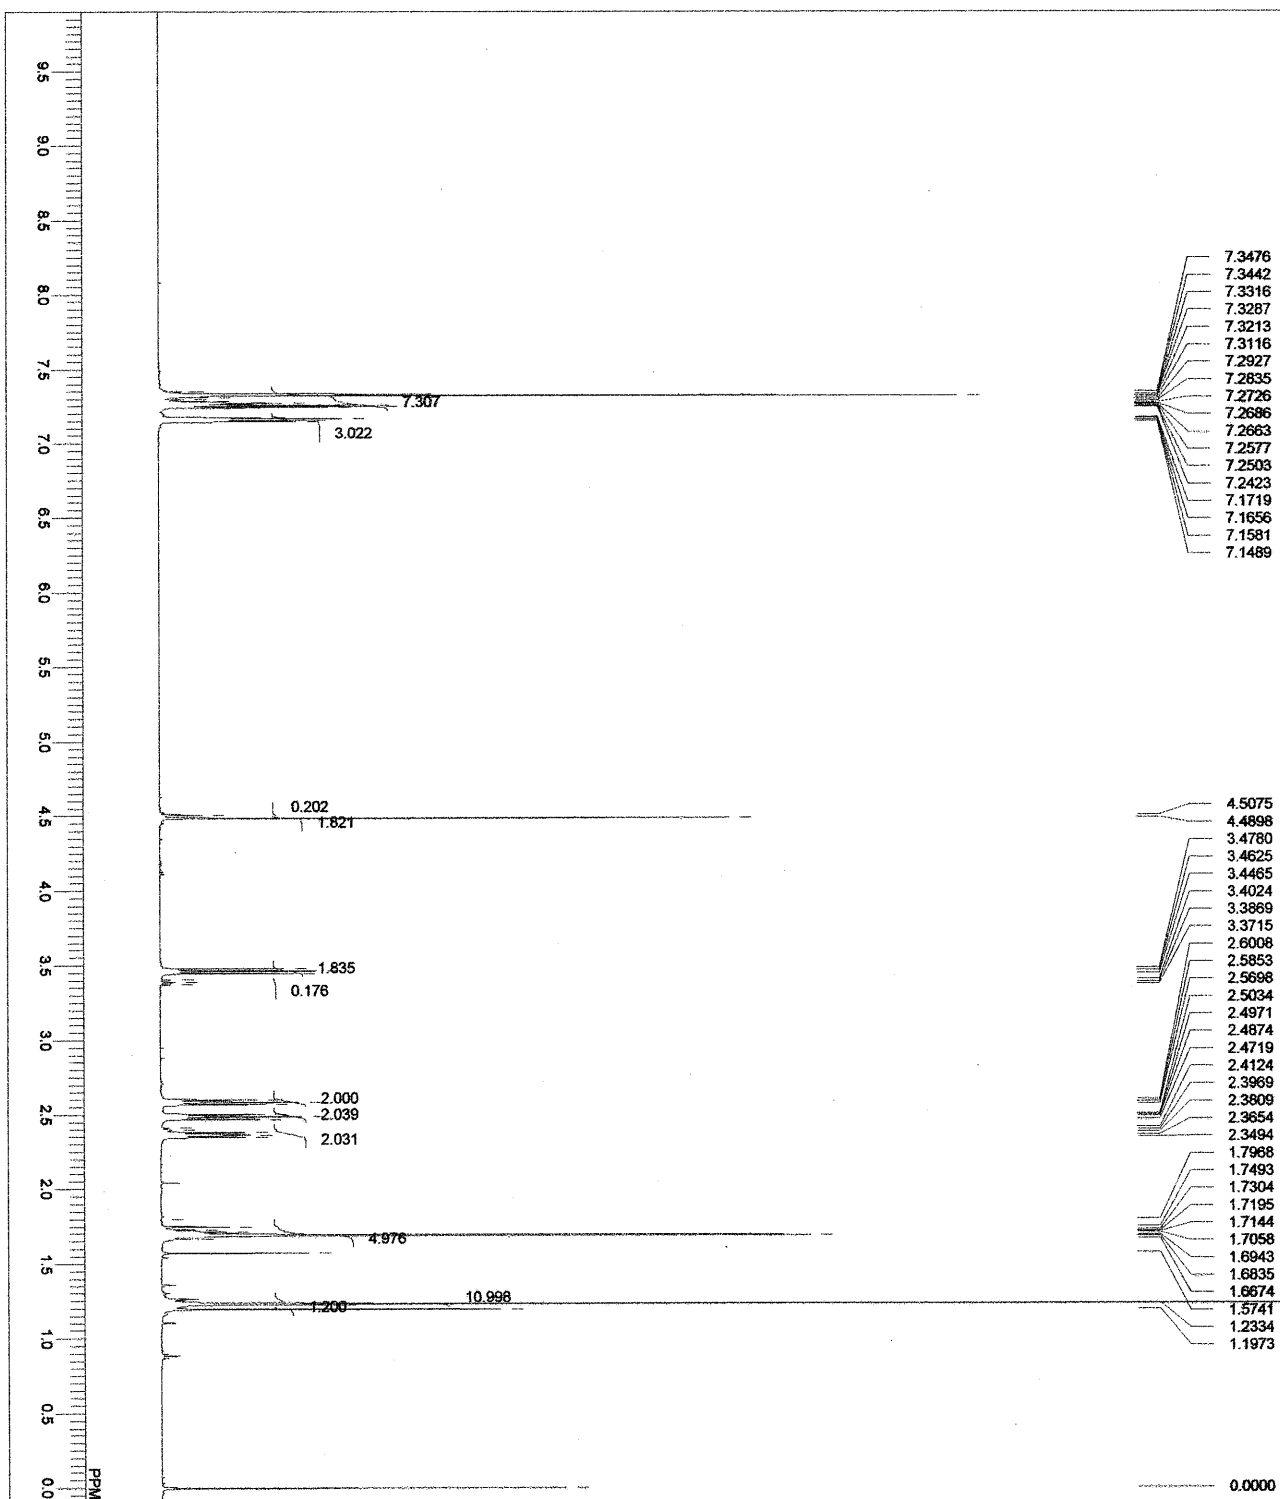

DFILE Ever20160405004-1-1.als  
 COUNT No.2869  
 DATIM 2016-04-05 20:29:18  
 OSNUC 1H  
 EXMOD proton, jx  
 OFREQ 500.16 MHz  
 OBSFET 2.41 KHz  
 OBSIN 6.01 Hz  
 POINT 28214  
 FREQ 7507.51 Hz  
 SCANS 8  
 ACQTM 1.7459 sec  
 PD 5.0000 sec  
 PWT 5.55 usec  
 IRNUC 1H  
 CTMP 29.8 c  
 CDOL 3  
 SLVNT CDCL3  
 EXREF 0.00 ppm  
 BF 0.12 Hz  
 RGAIN 28

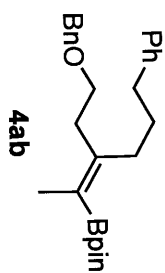

C:\Documents and Settings\user1\My Documents\Gousselle\Everalkyboration\Ever20180405004Carbor-1-1.a1st

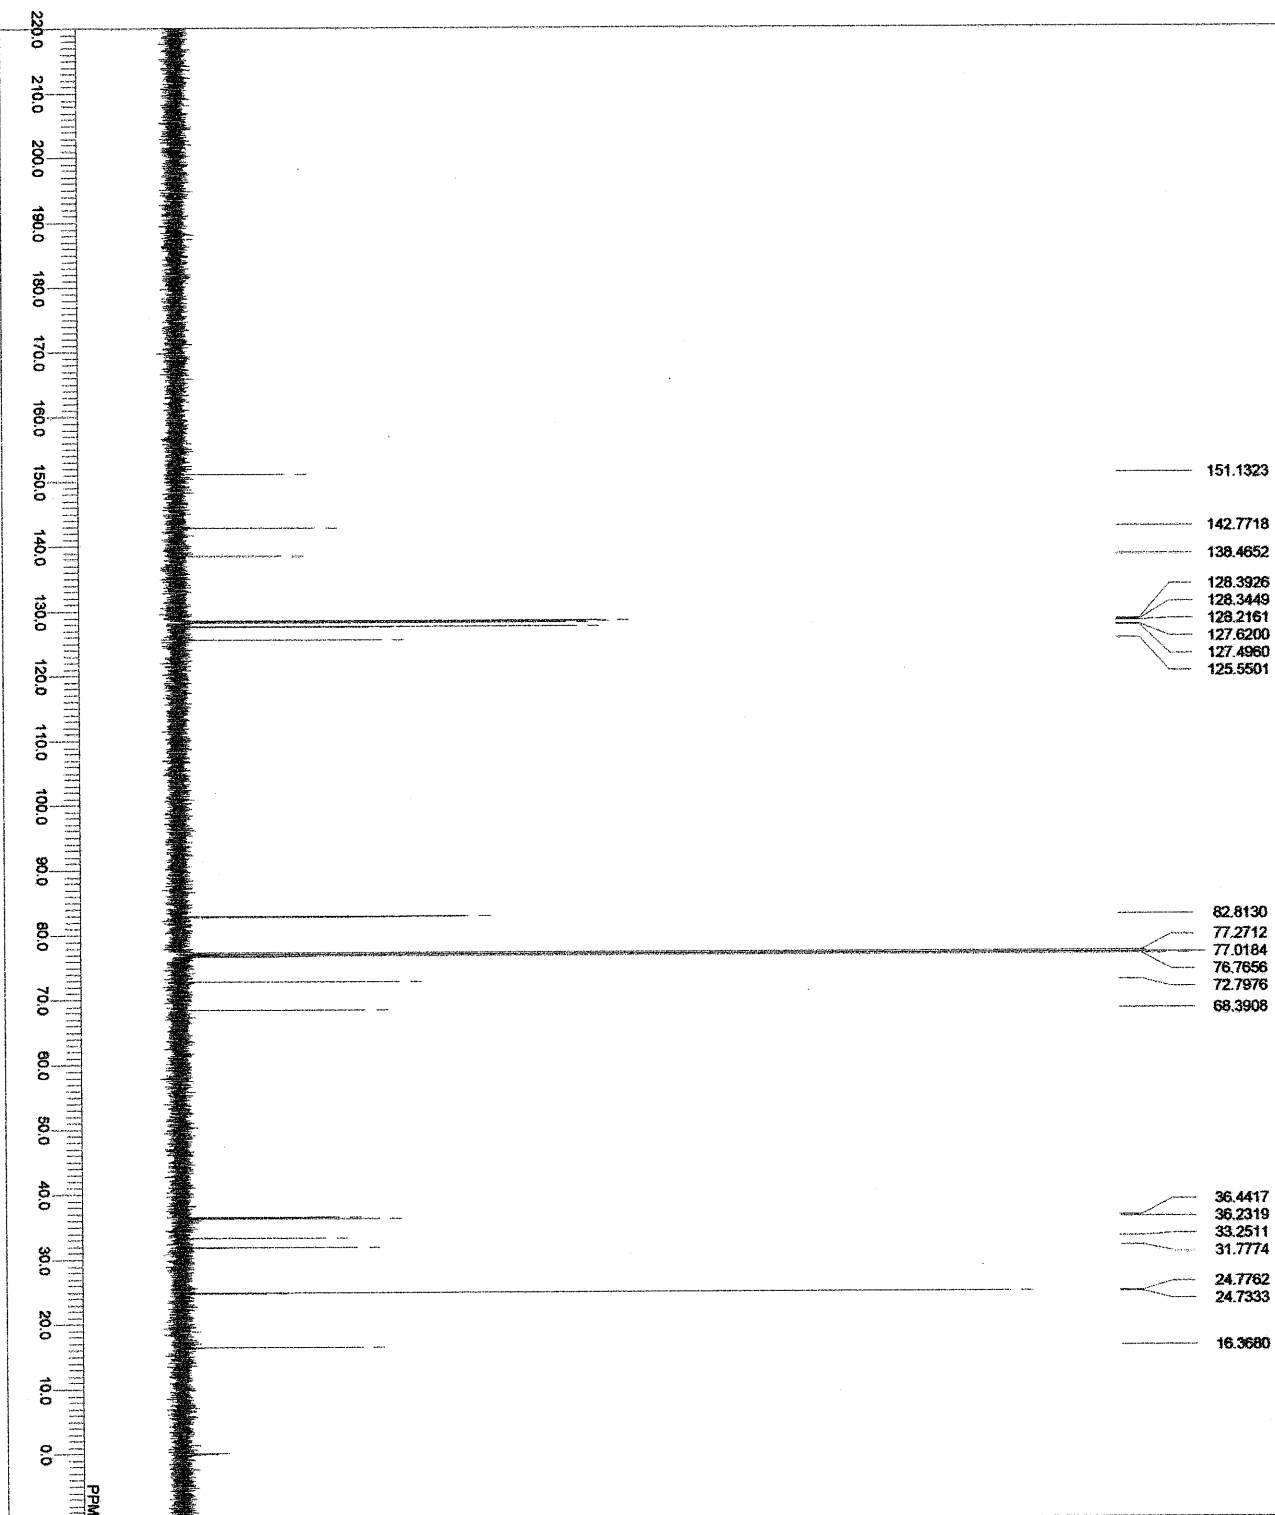

|        |                                |
|--------|--------------------------------|
| DEFILE | Ever201804050004carbon-1'-1s1s |
| COMENT | No 2869 Carbon                 |
| DATUM  | 2018-04-05 20:30:48            |
| ORNLUC | 13C                            |
| EXMDD  | carbon.txp                     |
| ORFRO  | 125.77 MHz                     |
| ORSET  | 7.87 KHz                       |
| ORFIN  | 4.21 KHz                       |
| POINT  | 53248                          |
| PRECU  | 3144604 Hz                     |
| SCANS  | 128                            |
| ACQTM  | 0.8336 sec                     |
| PD     | 2.0000 sec                     |
| PVM1   | 3.40 usec                      |
| IRNUC  | 1H                             |
| CTEMP  | 32.9 c                         |
| SLVNT  | CDCl3                          |
| EXREF  | 0.00 ppm                       |
| BF     | 0.82 Hz                        |
| RGAIN  | 60                             |

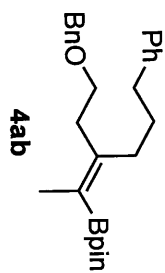





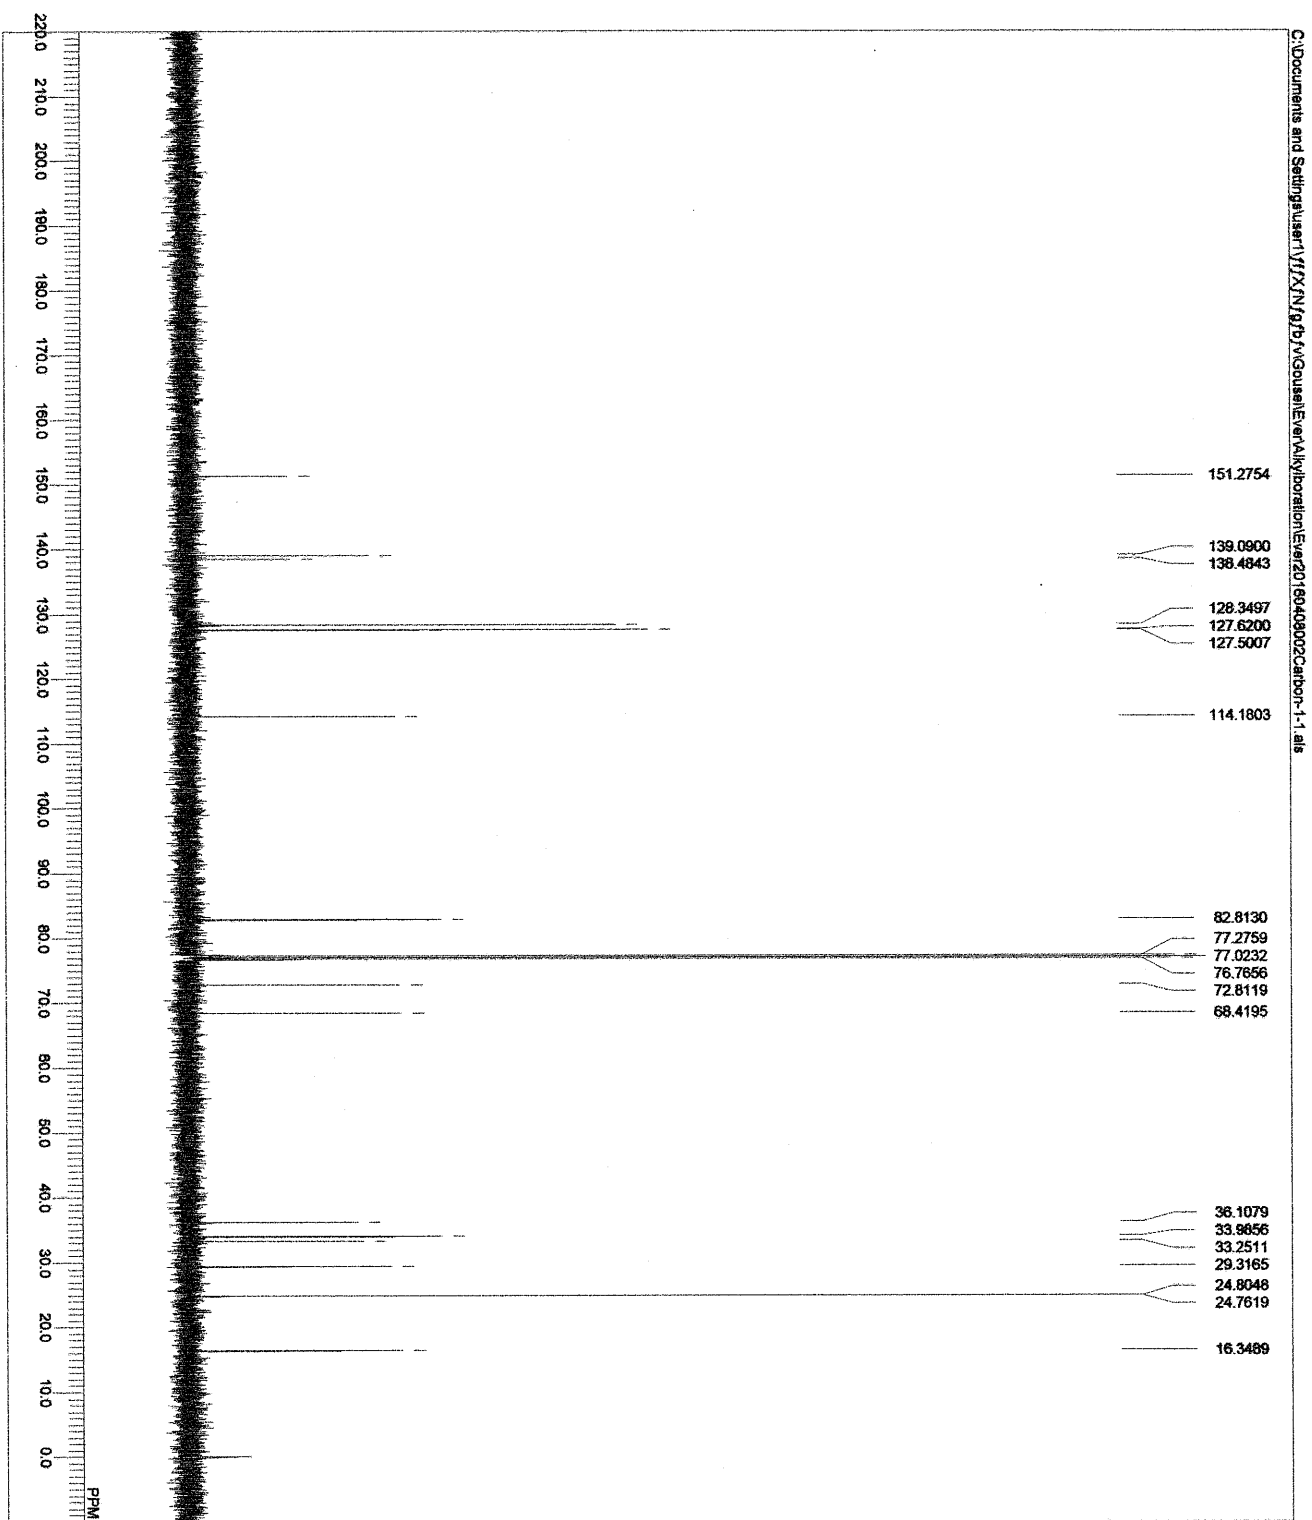

FILE Ew2018040802Carbon-1-1.als  
 COUNT No.2877 Carbon  
 DATE 2018-04-08 15:36:08  
 EXWID 13C  
 EXWID carbon.jpg  
 OBFRQ 125.77 MHz  
 OBSET 7.87 KHz  
 OBFIN 4.21 Hz  
 POINT 52428  
 FREQU 31446.54 Hz  
 SCANS 92  
 ACQTM 0.8336 sec  
 PD 2.0000 sec  
 PULP 3.40 usec  
 FWH 1H  
 CTEMP 33.0 c  
 CDCL3  
 SLVNT 0.00 ppm  
 EXREF 0.62 Hz  
 BF 60  
 RGAIN

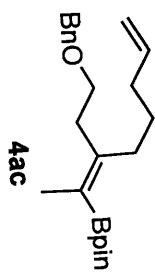

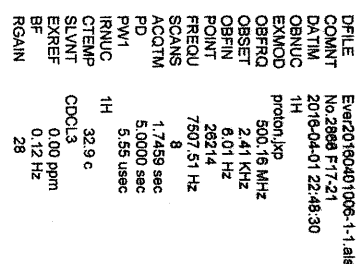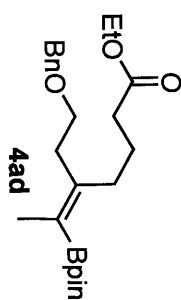

C:\Documents and Settings\User1\My Documents\NMR\20160401006Carbon-1-1.a1s

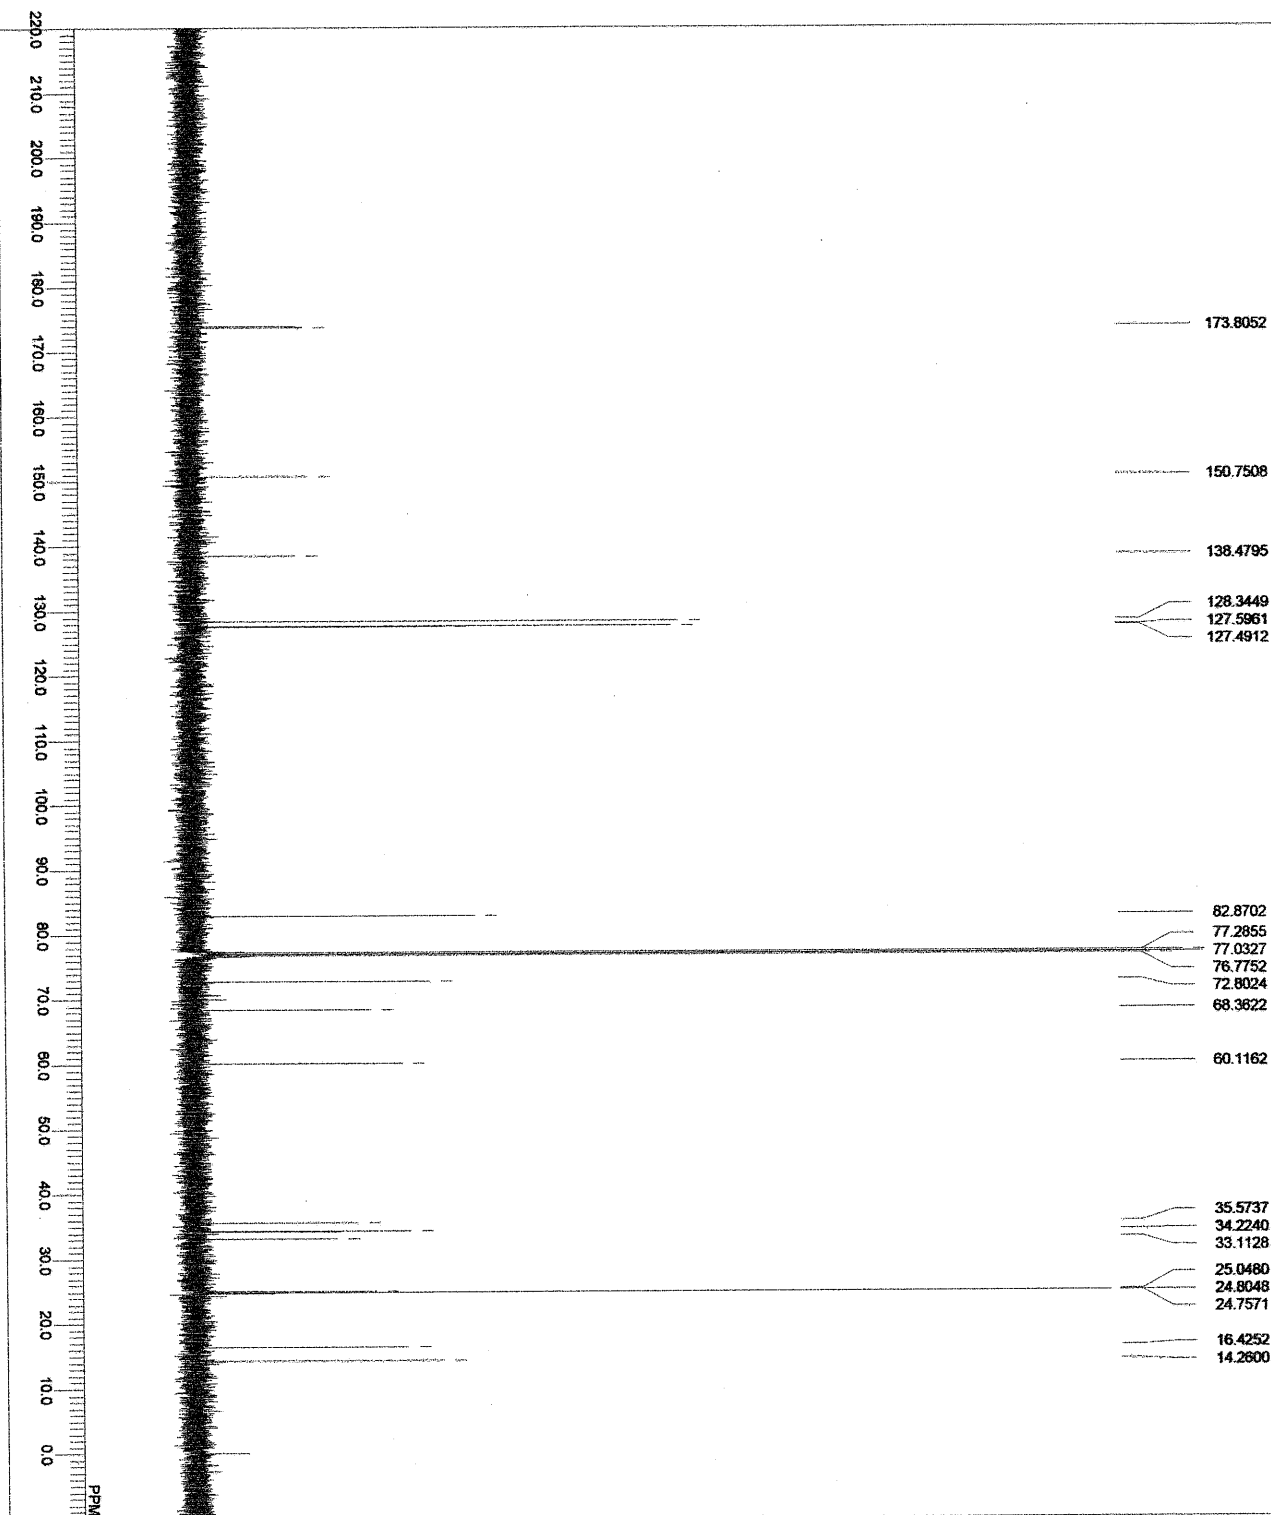

DFILE E:\20160401006Carbon-1-1.a1s  
 COUNT No.2866 F17-21  
 DATIM 2016-04-01 22:48:50  
 CNAME 13C  
 EXMOD carbon\_1xp  
 OBSFREQ 125.77 MHz  
 OBSSET 7.87 KHz  
 OBSFIN 4.21 Hz  
 POINT 52428  
 FRECU 31446.54 Hz  
 SCANS 84  
 ACQTM 0.8336 sec  
 PD 2.0000 sec  
 PM1 3.40 usec  
 IRNUC 1H  
 CTEMP 32.8 c  
 CDCL3 0.00 ppm  
 SLVNT EXREF  
 BF 0.62 Hz  
 RGAIN 60

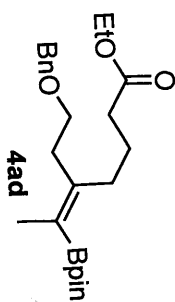

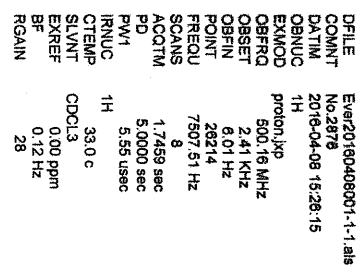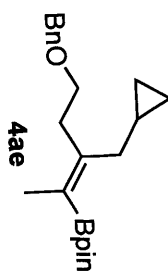

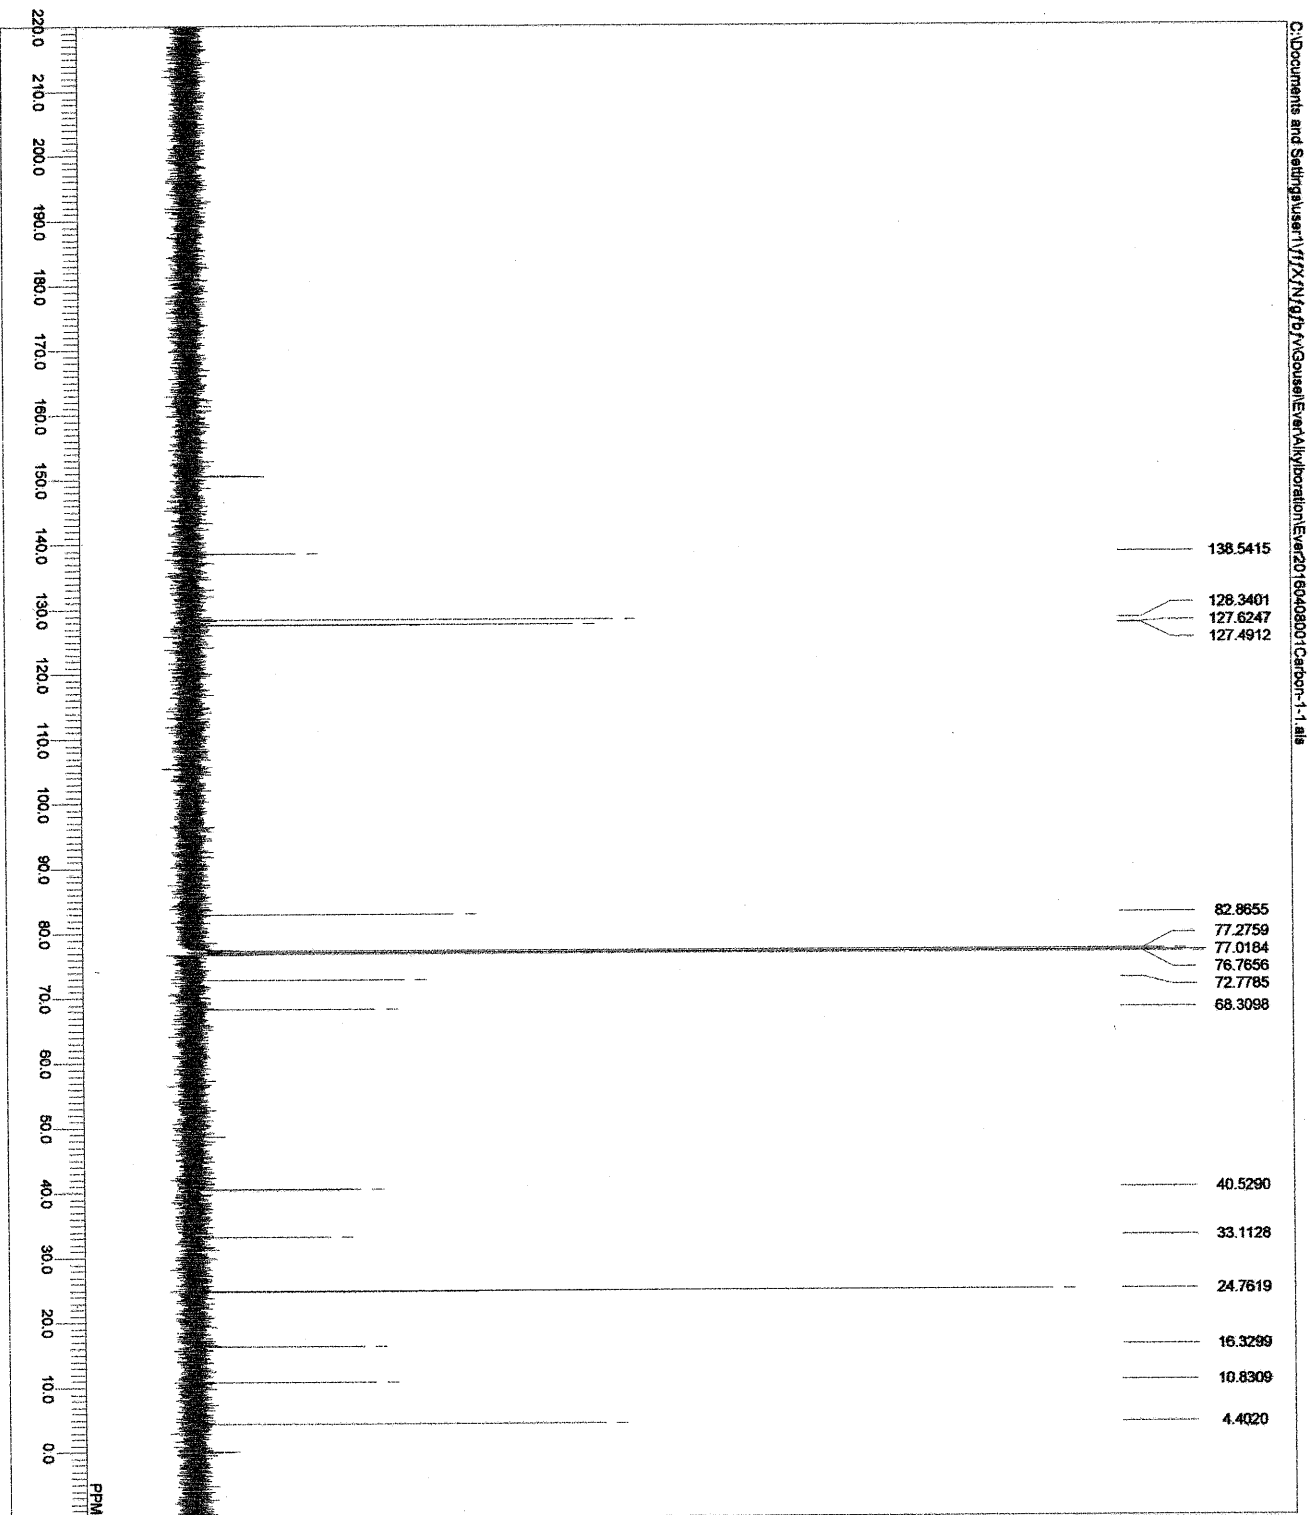

FILE Ever2018040801 Carbon-1-1.sis  
 COUNT No.2876 Carbon  
 DATIM 2018-04-08 15:28:33  
 OBNUC 13C  
 EXMOD carbon-13p  
 OBSFREQ 125.77 MHz  
 OBSSET 7.87 KHz  
 OBFIN 4.21 Hz  
 POINT 62428  
 FREQU 31446.54 Hz  
 SCANS 64  
 ACQTM 0.8336 sec  
 PD 2.0000 sec  
 PM1 3.40 usec  
 IRNUC 1H  
 CTMP 32.5 C  
 SLVNT CDCL3  
 EXREF 0.00 ppm  
 BF 0.62 Hz  
 RGAIN 60

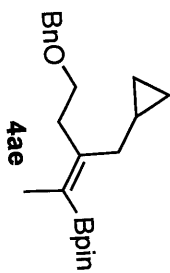

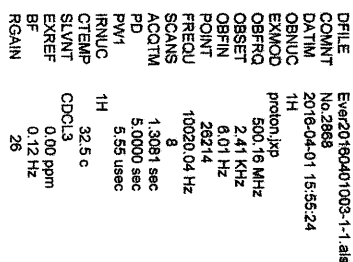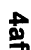

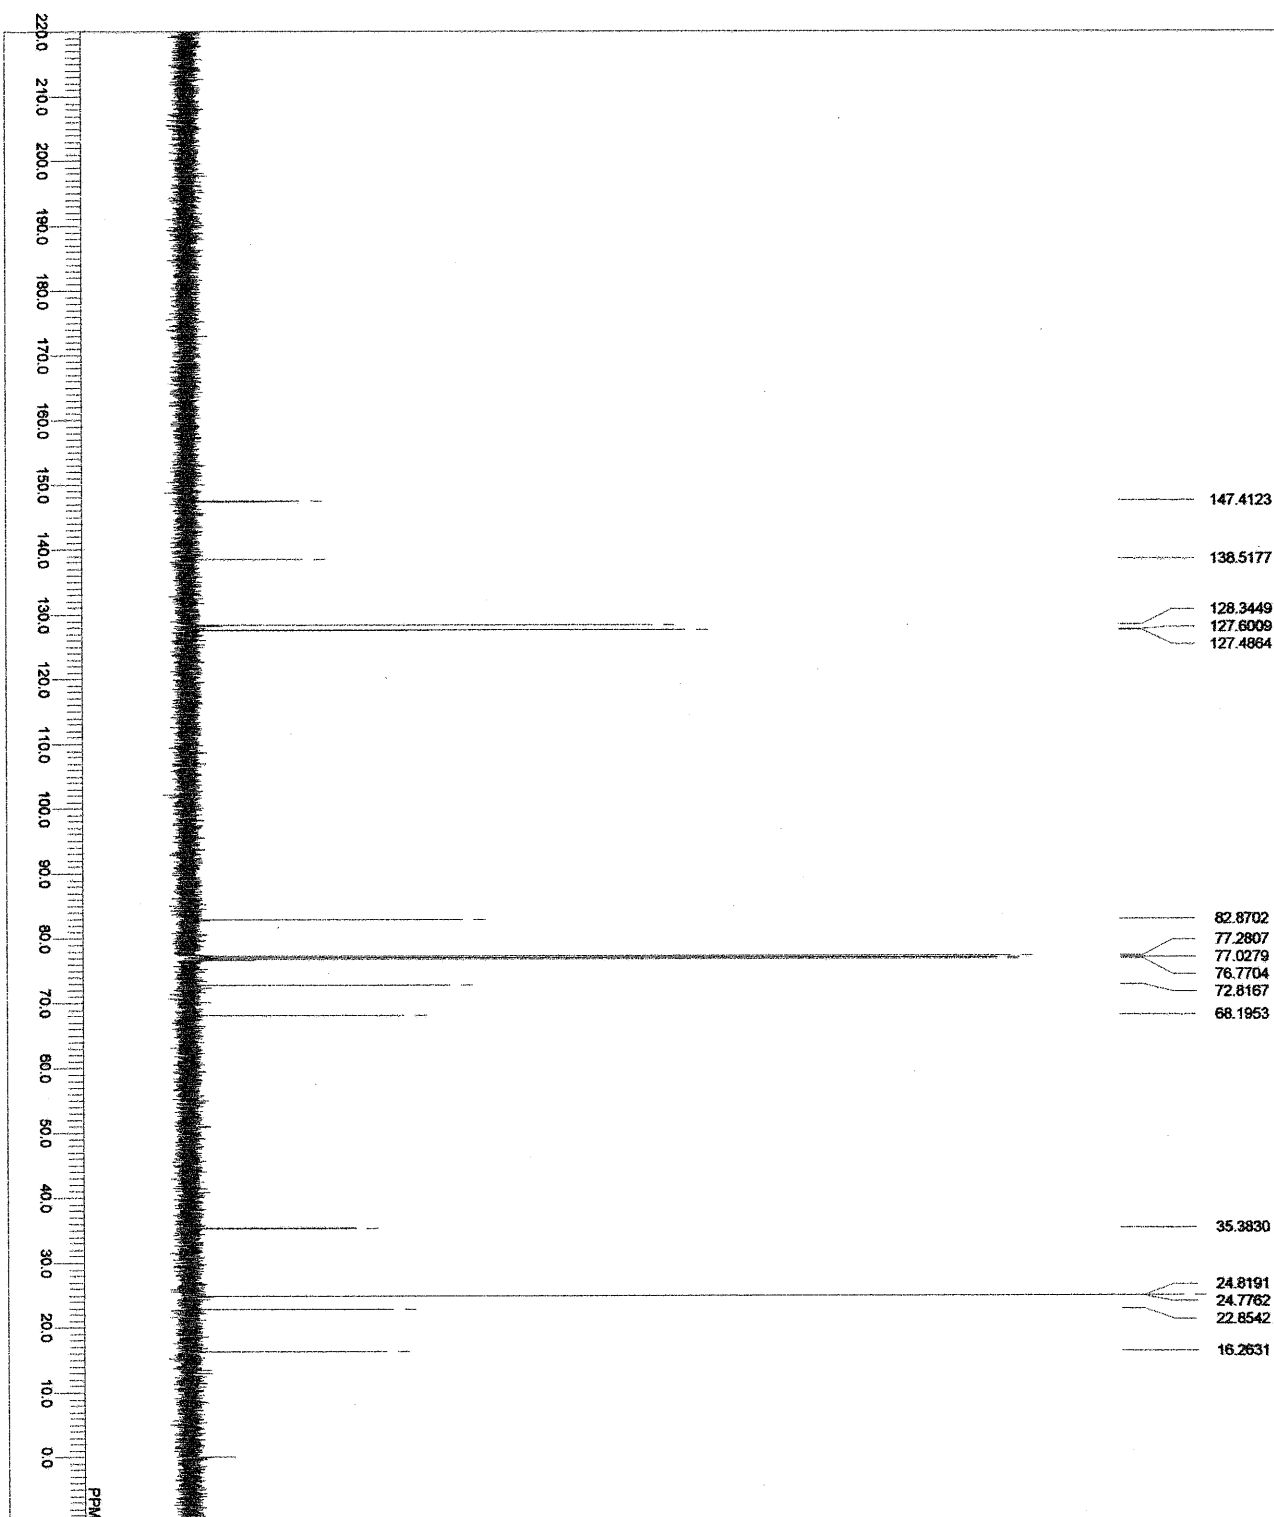

|         |                                |
|---------|--------------------------------|
| NAME    | Emer201804010030carbon-1-1-als |
| COMPILE | No.2868 Carbon                 |
| DATE    | 2018-04-01 15:56:50            |
| ORIGIN  | 13C                            |
| EXMOD   | carbon_jcp                     |
| CBFREQ  | 125.77 MHz                     |
| OBSSET  | 1.67 kHz                       |
| OBFIN   | 4.21 Hz                        |
| POINT   | 52428                          |
| SCANS   | 31446.64 Hz                    |
| FREQ0   | 64                             |
| ACQTIME | 0.8536 sec                     |
| PD      | 2.0000 sec                     |
| PW1     | 3.40 usec                      |
| IRNUC   | 1H                             |
| CTEMP   | 29.7 c                         |
| SOLVENT | CDCl3                          |
| EXREF   | 0.00 ppm                       |
| BF      | 0.62 Hz                        |
| RGAIN   | 60                             |

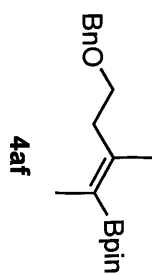

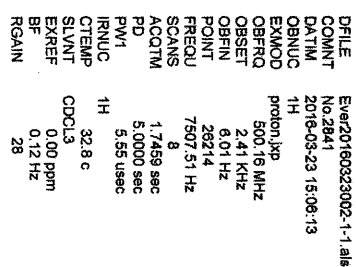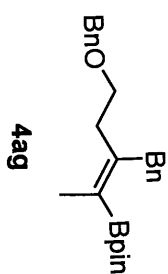



C:\Documents and Settings\user1\My Documents\Evening\Hydration\Even\20160323002Carbon-1-1.als

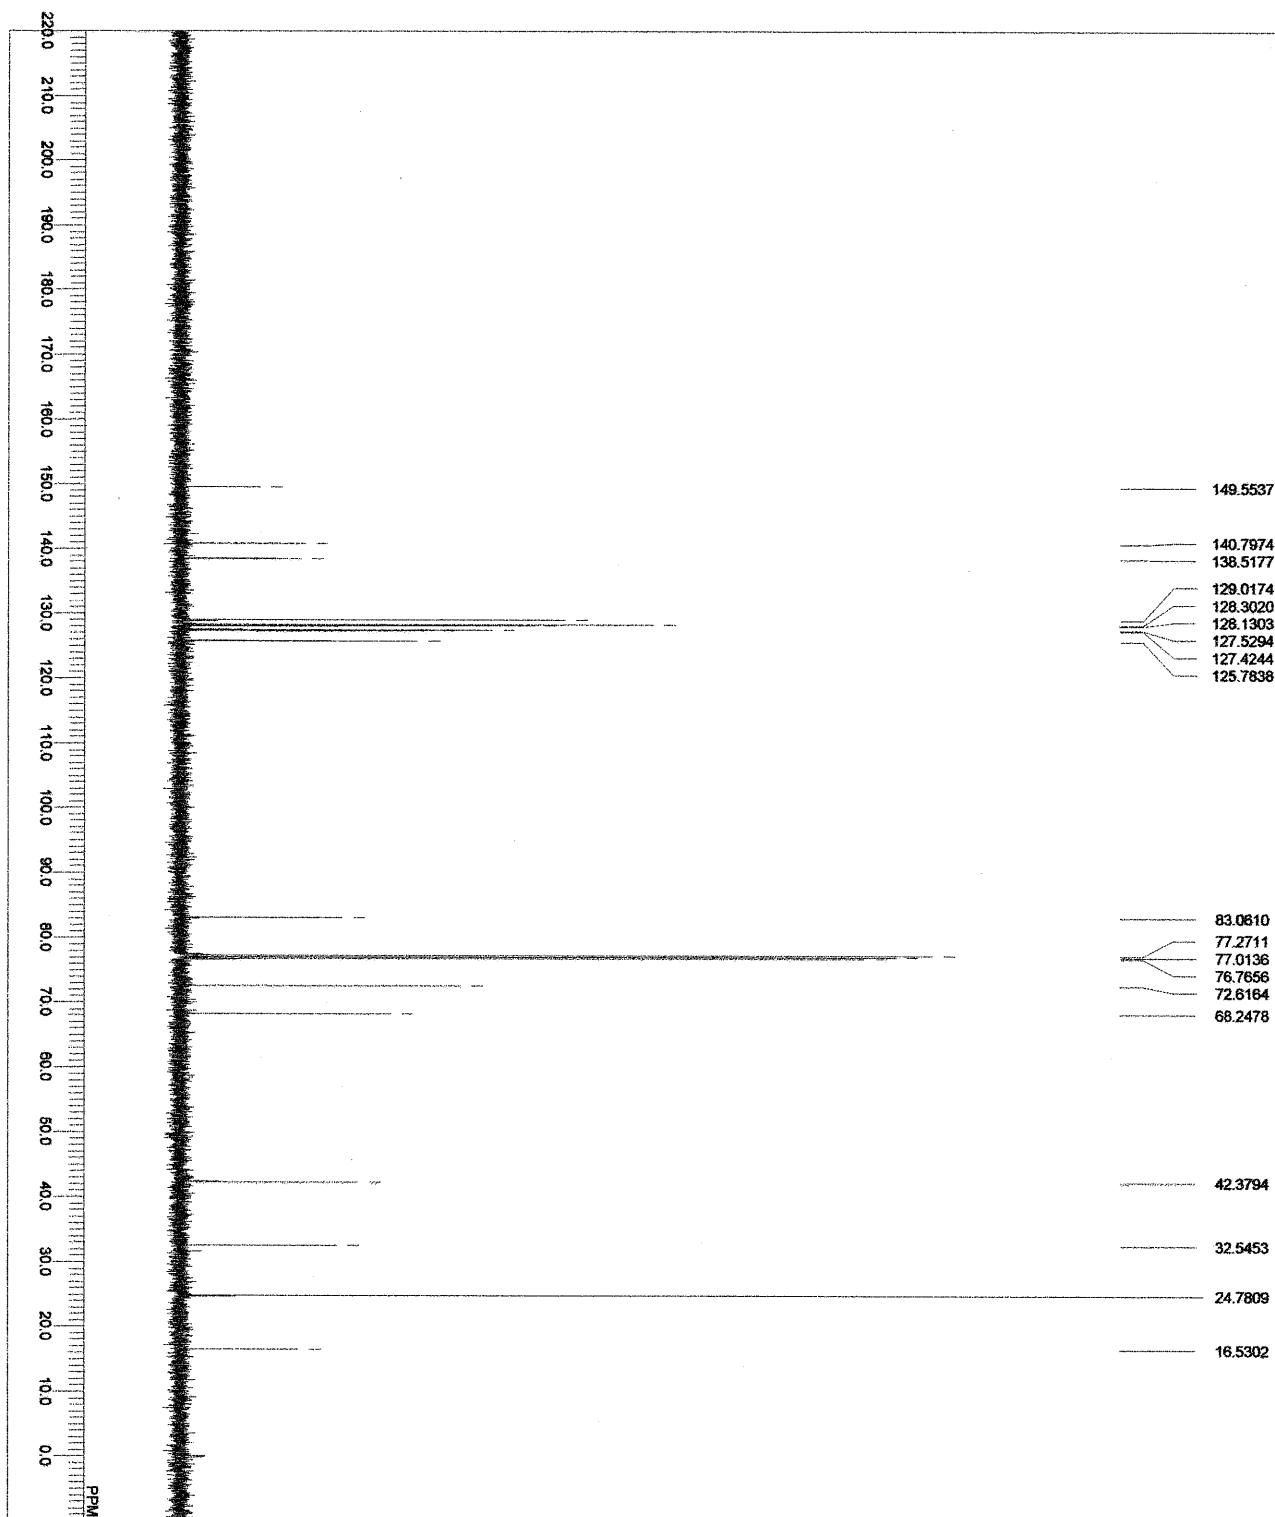

DFILE Even\20160323002Carbon-1-1.als  
 COMMENT No.2841 Carbon  
 DATIM 2016-03-23 15:07:42  
 OBNUC 13C  
 EXMOD carbon\_13p  
 OBFREQ 125.77 MHz  
 OBSET 7.87 KHz  
 OBRIN 4.21 Hz  
 POINT 20214  
 FREQU 31446.64 Hz  
 SCANS 100  
 ACQTM 0.8336 sec  
 PD 2.0000 sec  
 PW1 3.40 usec  
 IRNUC 1H  
 CTEMP 32.9 c  
 SLVNT CDCl3  
 EXREF 0.00 ppm  
 BF 0.52 Hz  
 RGAIN 80

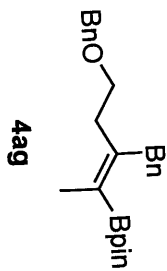

C:\Documents and Settings\user1\My Documents\NMR\Goussier\Ever20160401004-1-1.als

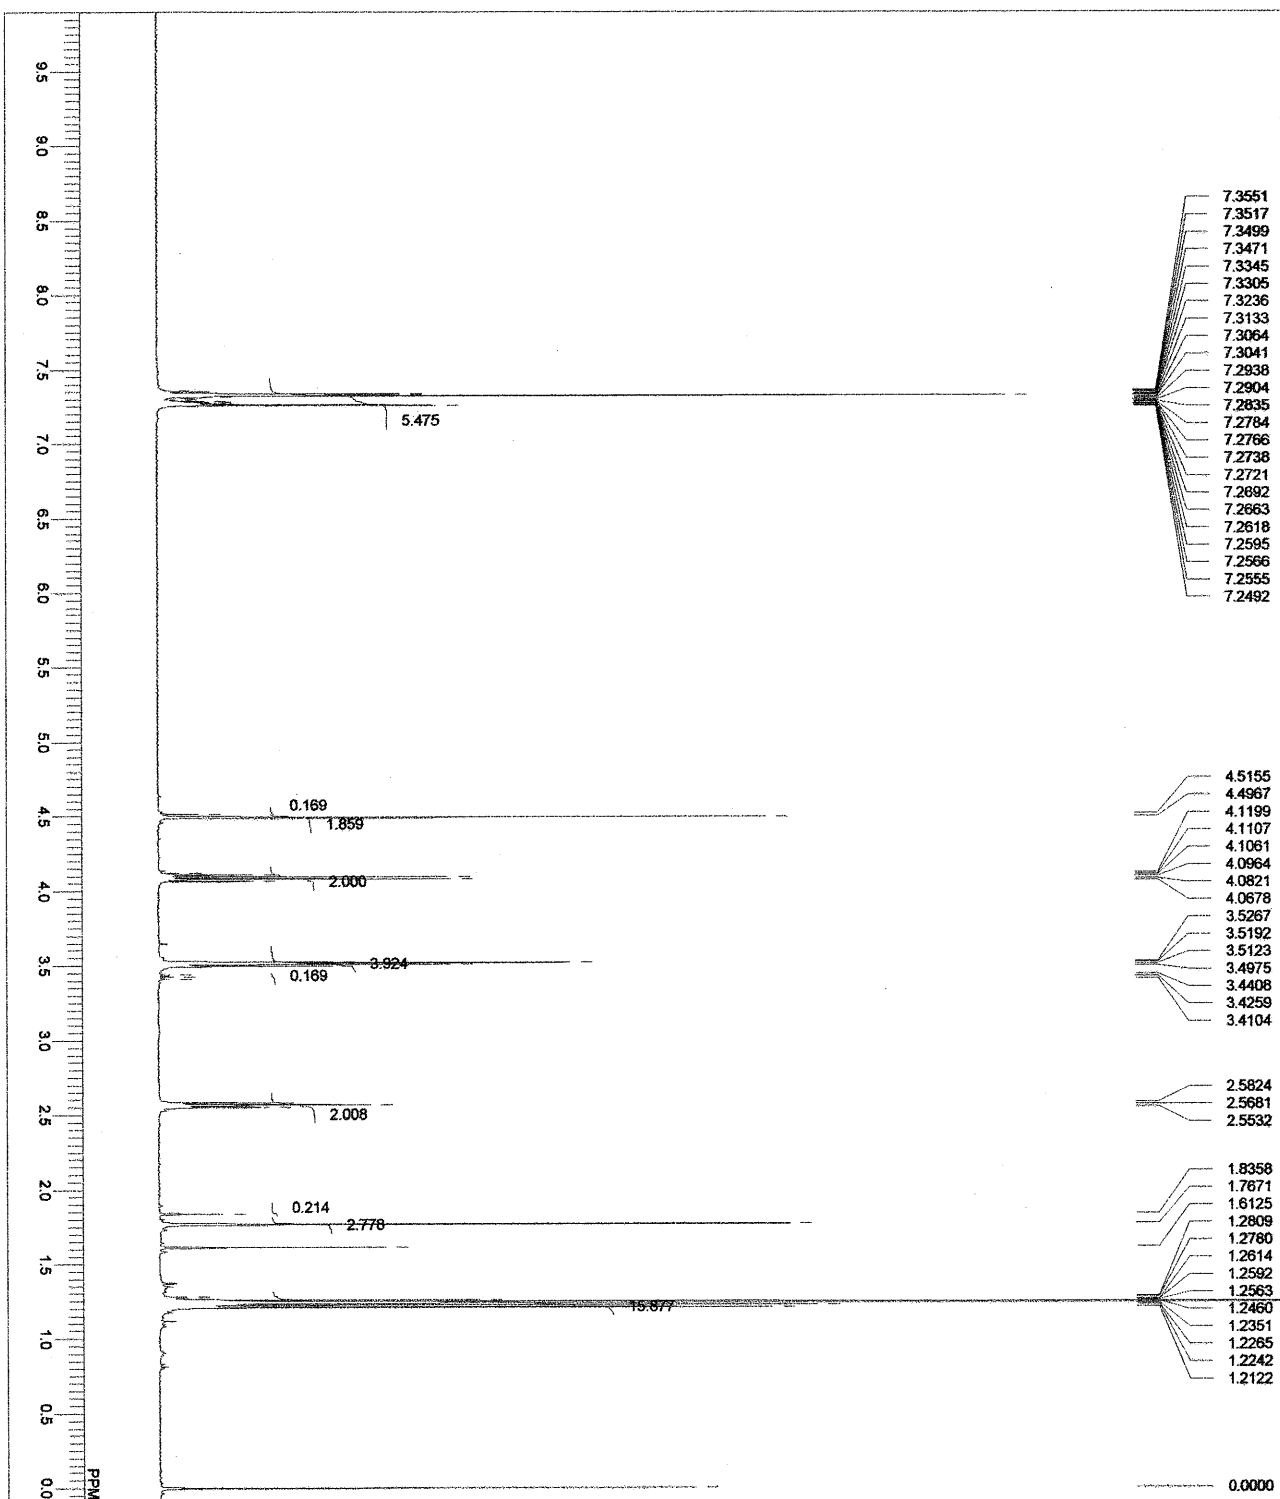

DFILE Ever20160401004-1-1.als  
 COMINT No.2862 GPC  
 DATIM 2016-04-01 22:34:46  
 OBNUC 1H  
 EXMCD proton, 1H  
 OBSRC 500.16 MHz  
 OBSRT 2.41 KHz  
 OBSIN 6.01 KHz  
 POINT 26214  
 FREQU 7507.51 Hz  
 SCANS 8  
 ACQTM 1.7459 sec  
 PD 5.0000 sec  
 PWT 5.55 usec  
 IRNUC 1H  
 CTIMP 32.5 c  
 SLVNT CDCl3  
 EXREF 0.00 ppm  
 BF 0.12 Hz  
 RGAIN 30

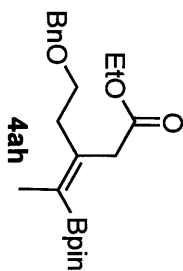

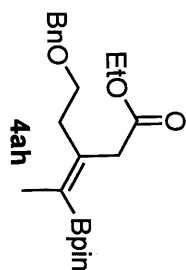

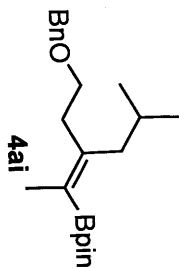

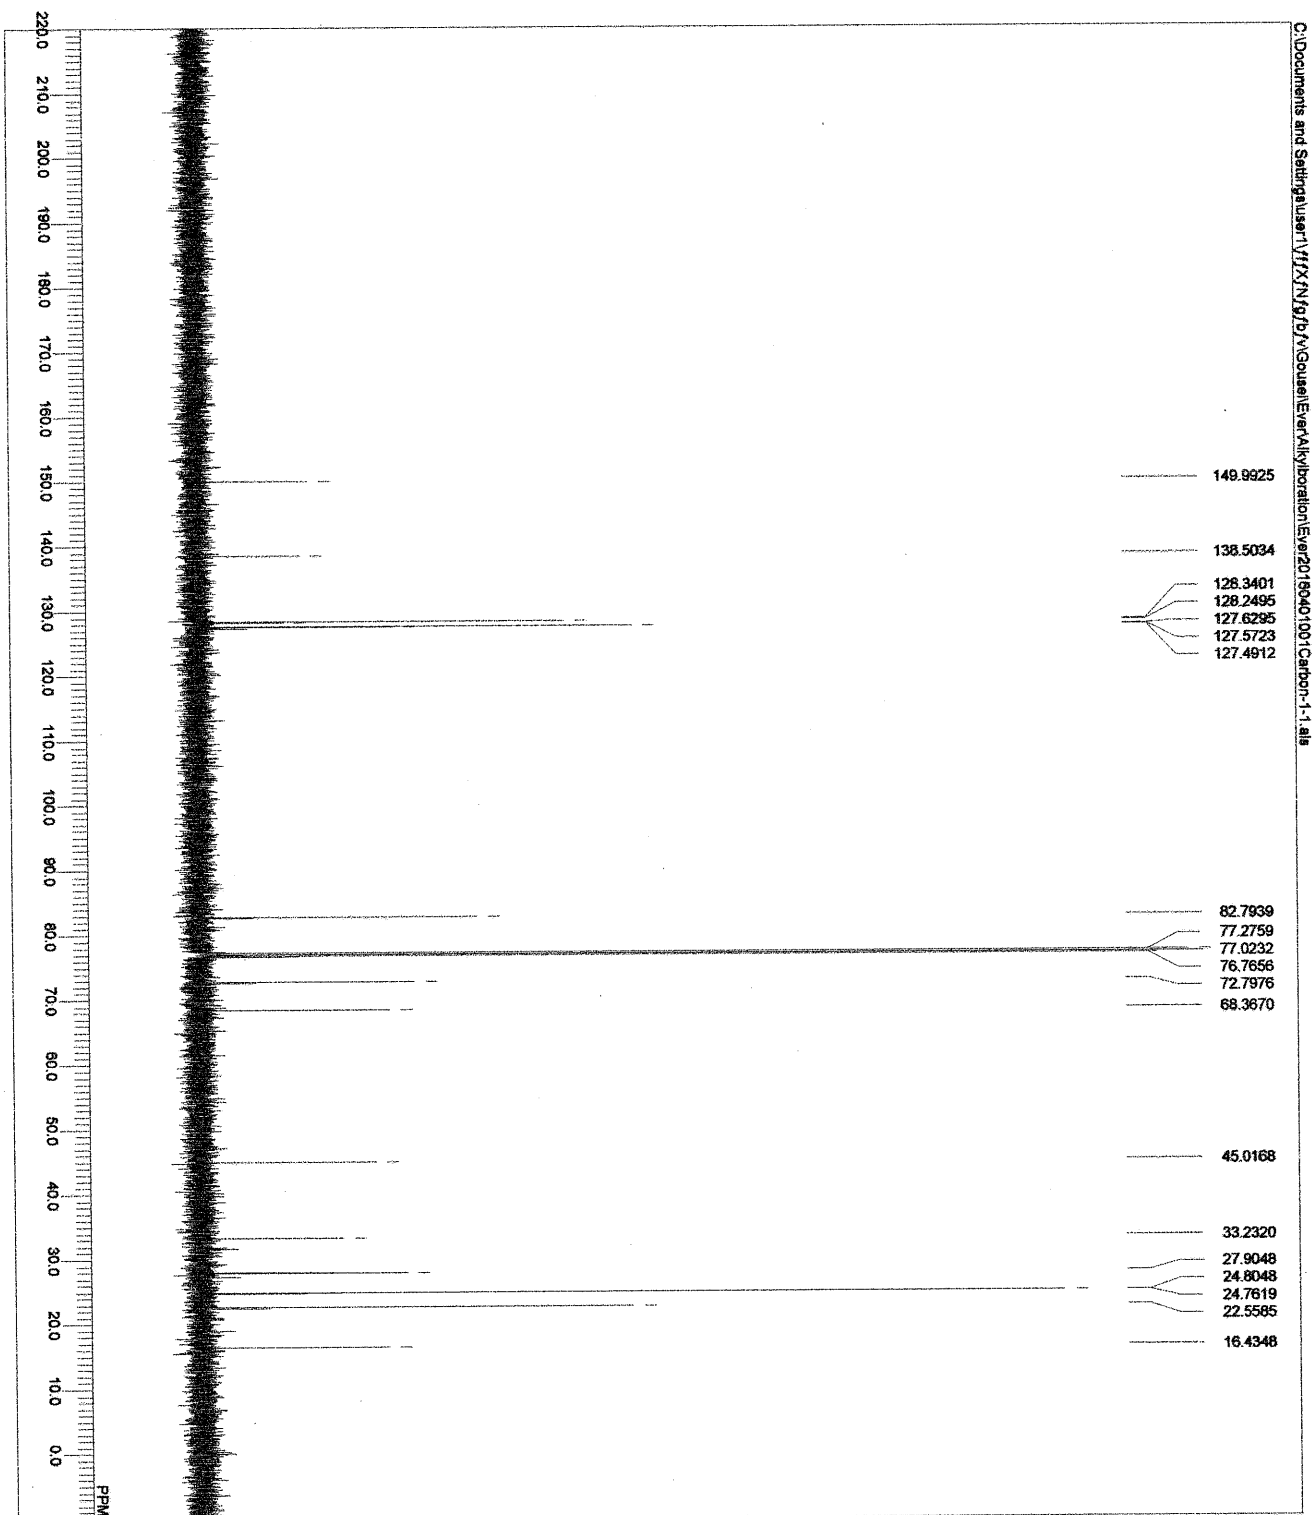

D:\FILE Ever20160401001Carbon-1-1.a1e  
 COMMENT No.2865 FS-7 Carbon  
 DATIM 2016-04-01 15:46:38  
 ORNUC 13C  
 EXAMOD carbon 13P  
 OBSFREQ 125.77 MHz  
 OBSSET 7.87 KHz  
 OBSFID 4.21 Hz  
 POINT 52428  
 FREQU 31448.54 Hz  
 SCANS 56  
 ACQTM 0.8336 sec  
 PD 2.0000 sec  
 PM1 3.40 usec  
 IRNUC 1H  
 CTEMP 32.4 c  
 CDCL3 0.00 ppm  
 SLVNT EXREF  
 BR 0.82 Hz  
 RGAIN 60

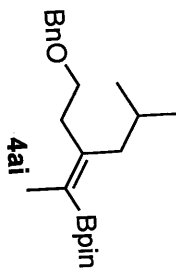

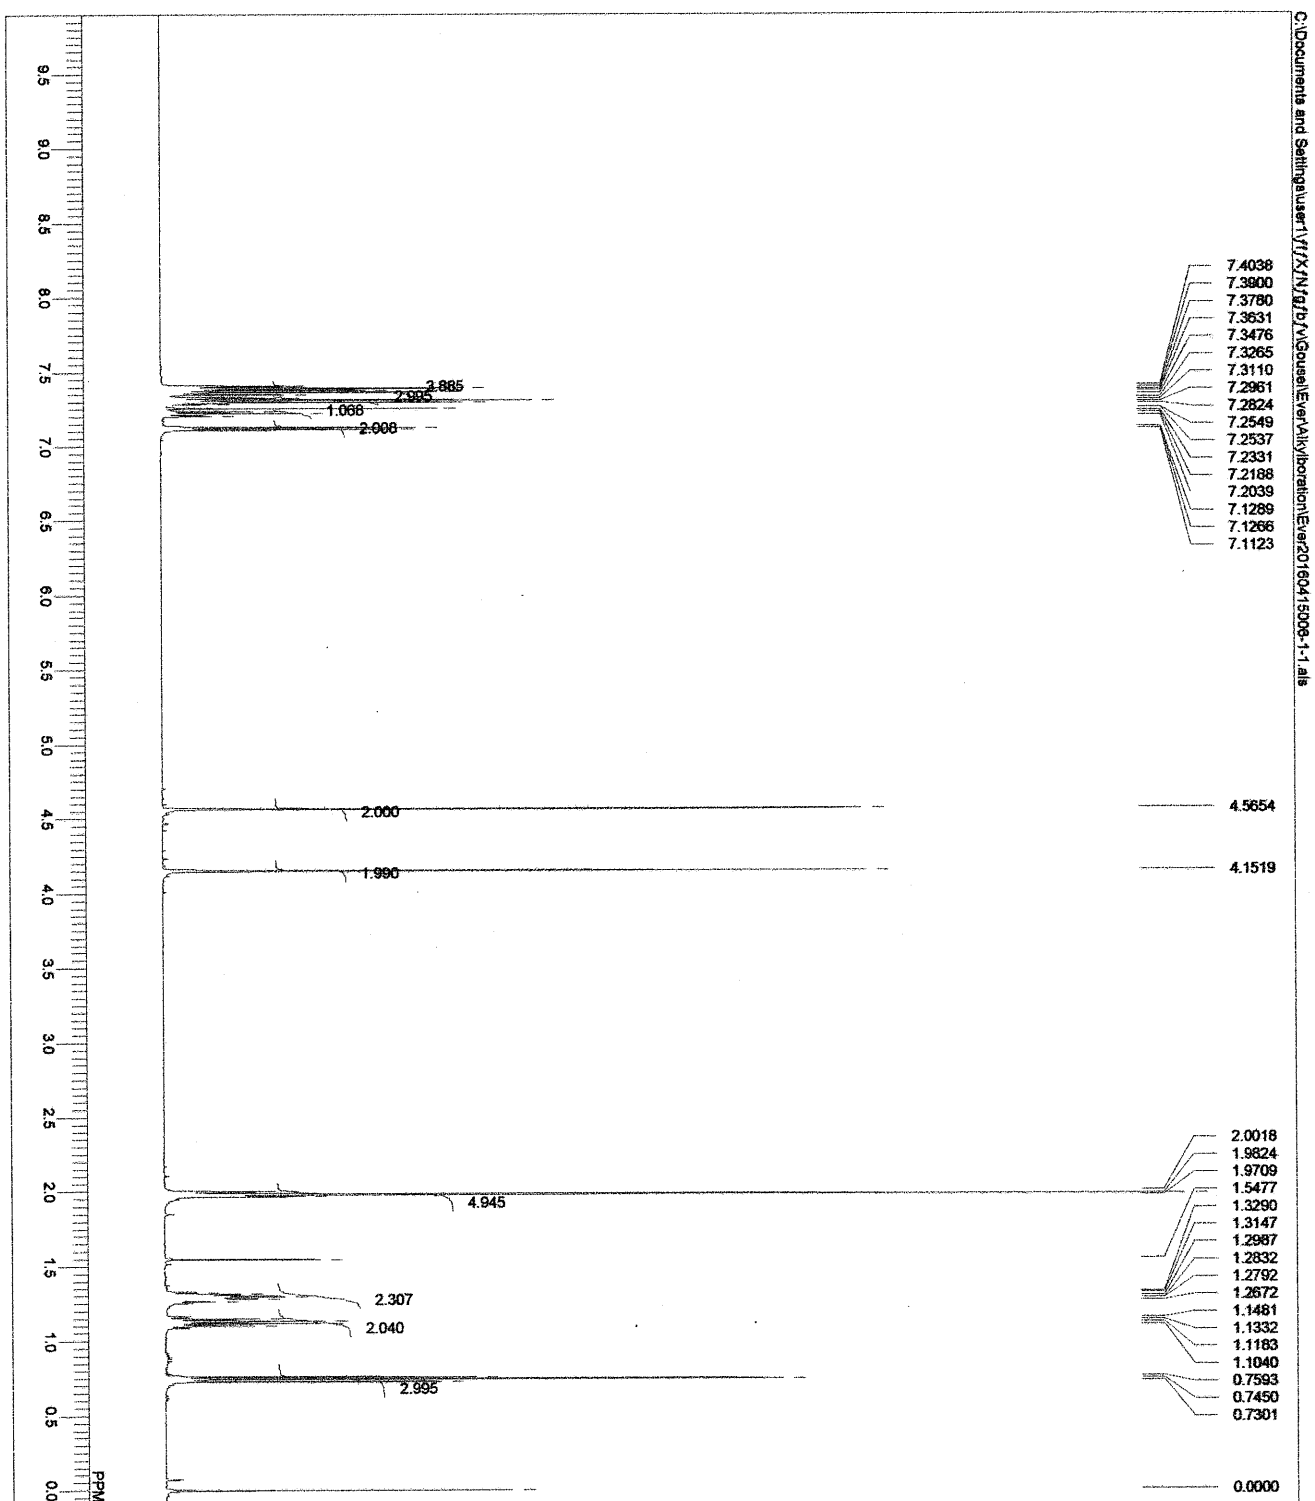

FILE Ever20160415006-1-1.aile  
 COUNT No.2892  
 DATE 2016-04-15 21:16:27  
 1H  
 EXMOD proton\_jyp  
 OBSFREQ 500.16 MHz  
 OBSSET 2.41 KHz  
 OBSFIN 6.01 Hz  
 POINT 26214  
 FREQU 7507.51 Hz  
 SCANS 8  
 ACQTM 1.7459 sec  
 PD 5.0000 sec  
 PVI 5.55 usec  
 IRNUC 1H  
 CTEMP 21.2 c  
 SLVNT CDCl3  
 EXREF 0.00 ppm  
 BF 0.12 Hz  
 RGAIN 28

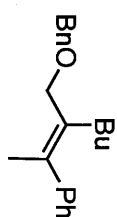

6

C:\Documents and Settings\user1\My Documents\My Computer\EverAlign\boration\Ever20160415006Carbon-1-1.a1s

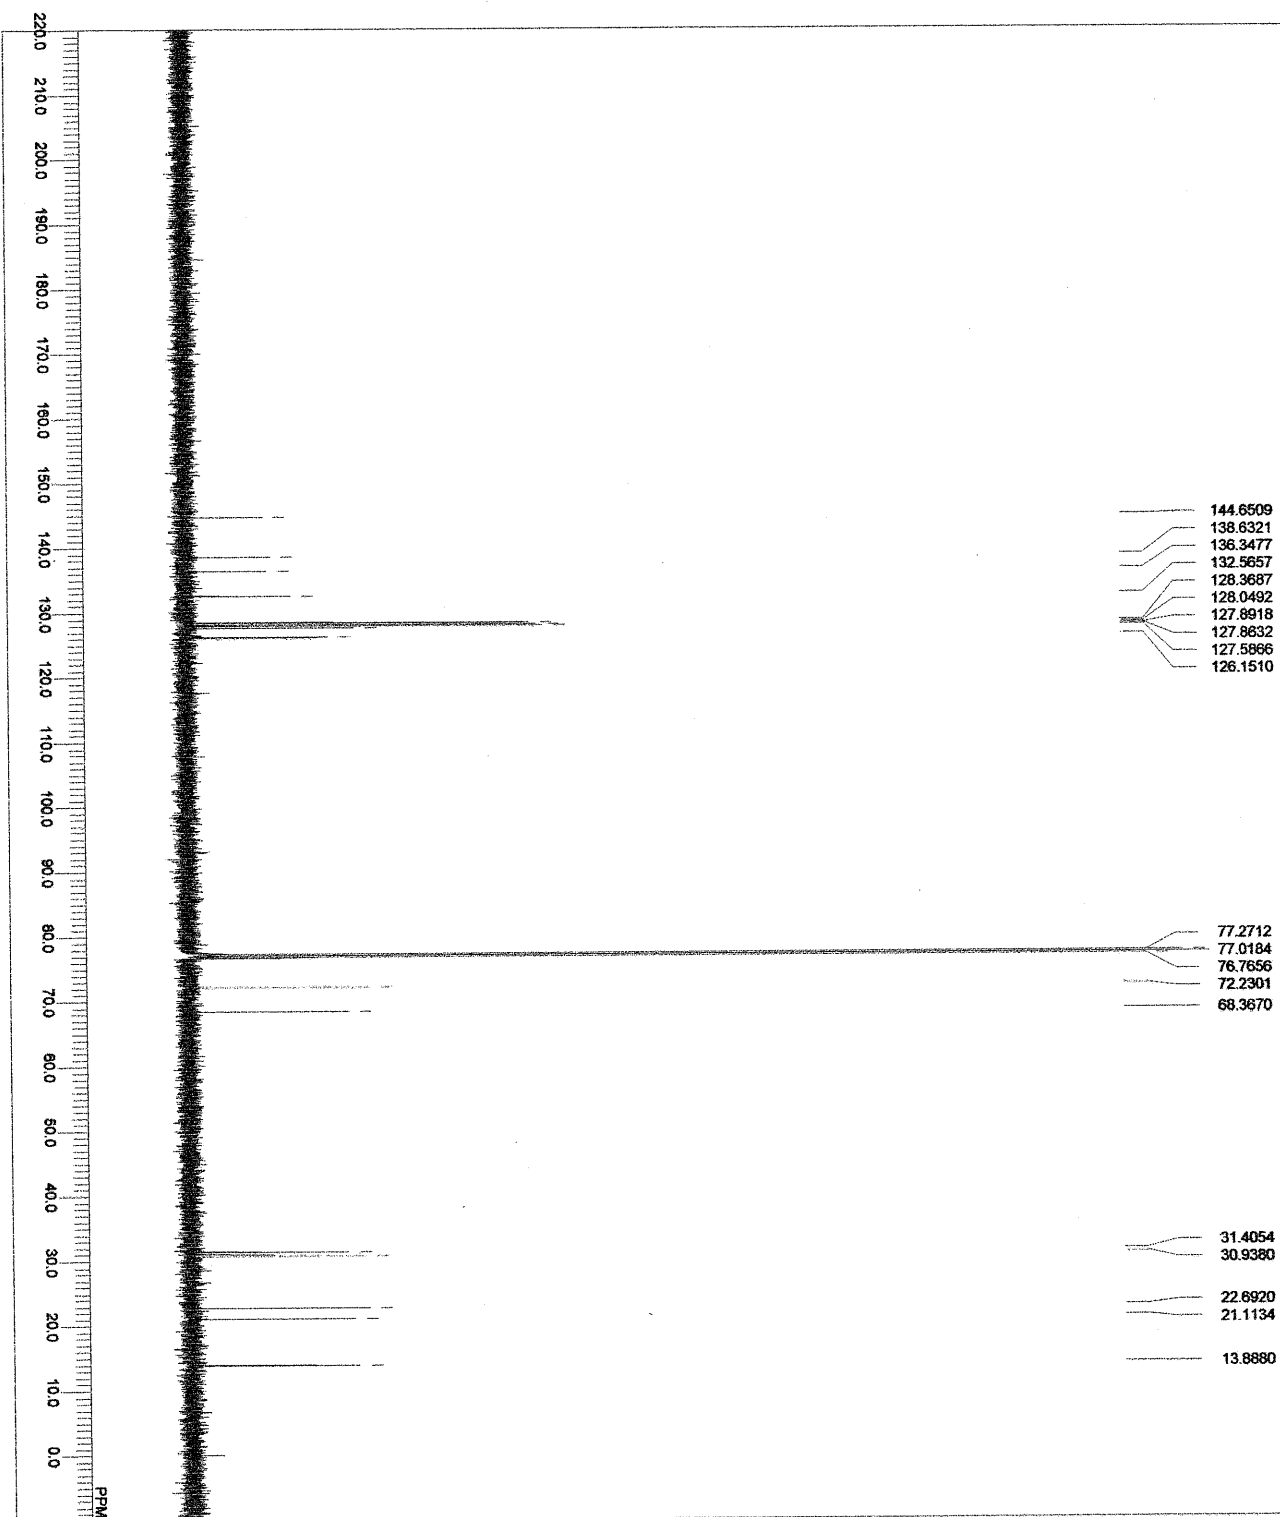

DFILE Ever20160415006Carbon-1-1.a1s  
 COMNT No.2892 Carbon  
 DATIM 2016-04-15 21:17:57  
 OBNLC 13C  
 EXMOD carbon-13  
 OBSFQ 125.77 MHz  
 OBSST 7.87 KHz  
 OBSIN 4.21 Hz  
 POINT 52428  
 FREQU 31446.54 Hz  
 SCANS 128  
 ACQTM 0.8336 sec  
 PD 2.0000 sec  
 PW1 3.40 usec  
 IRNLC 1H  
 CTEMP 21.5 c  
 CDCL3 0.00 ppm  
 EXREF 0.62 Hz  
 BP 60  
 RGAIN 60

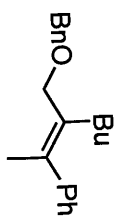

6

C:\Documents and Settings\user1\My Documents\NMR\20160423004-1-1.aif

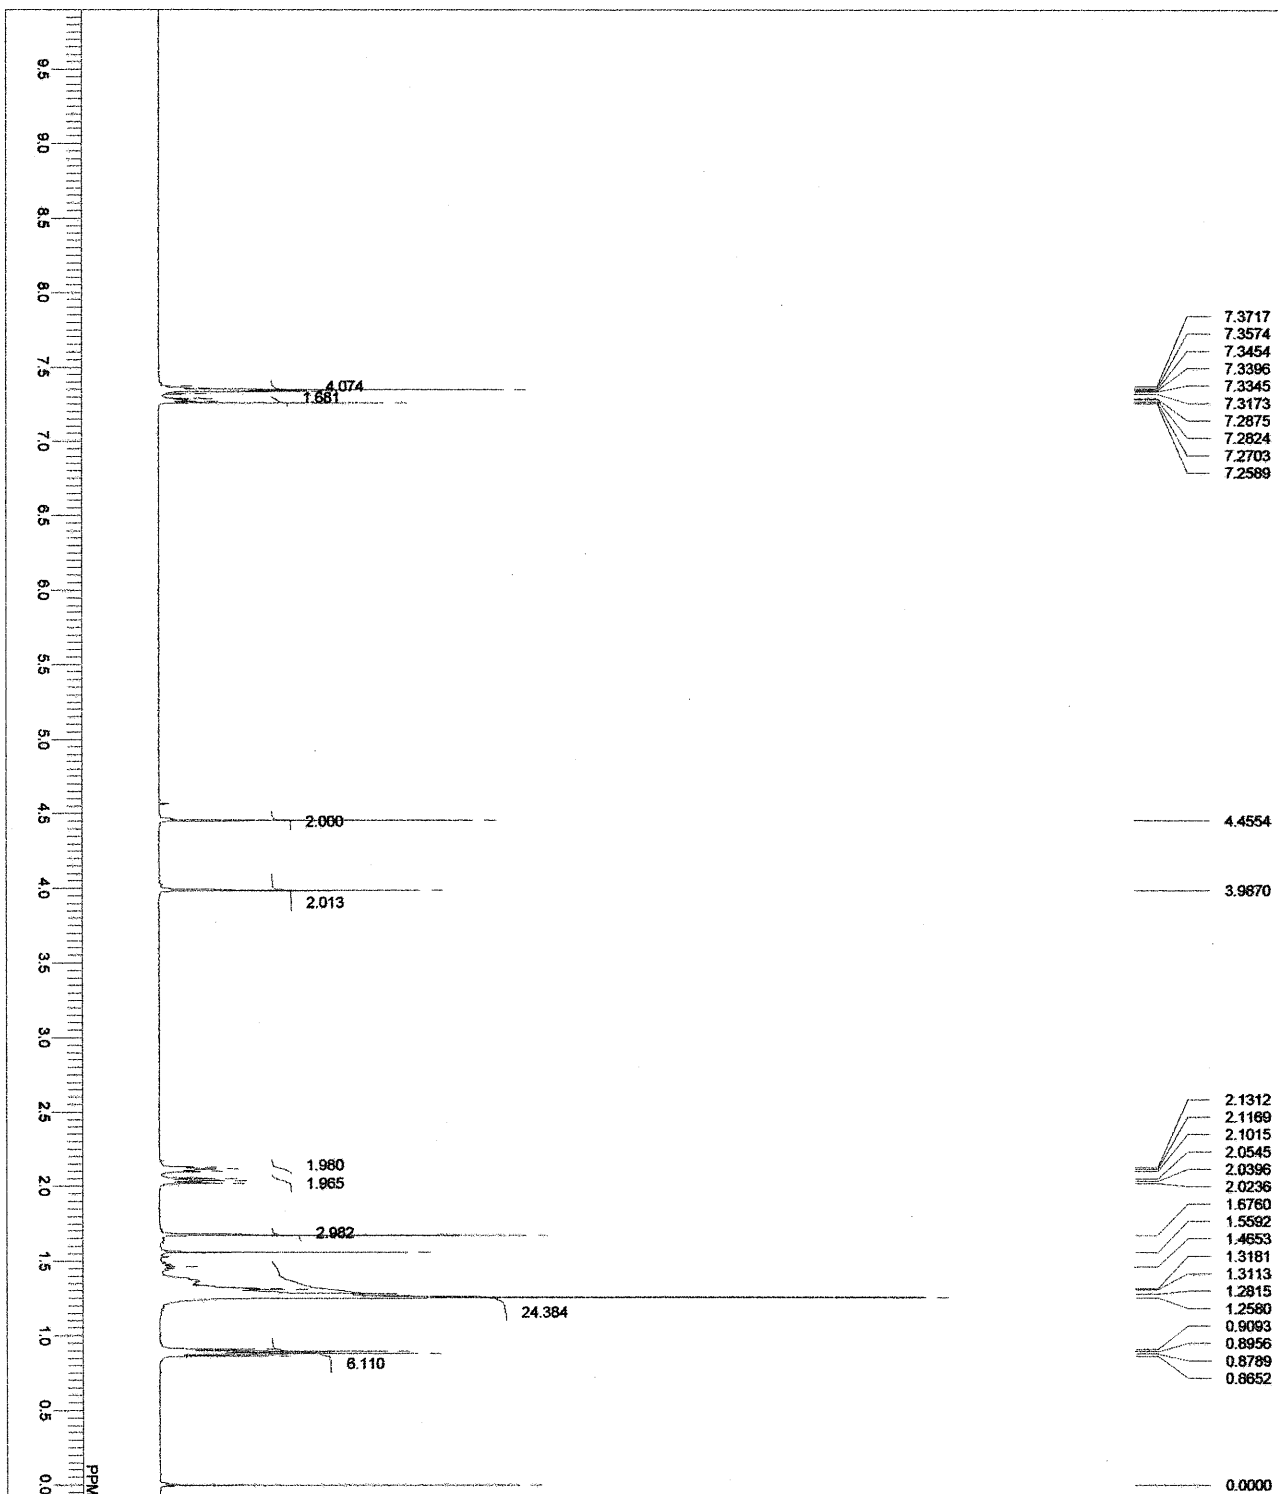

FILE Ever20160423004-1-1.aif  
 COMINT No.2927  
 DATIN 2016-04-23 18:14:50  
 1H  
 EXMOD proton, jxp  
 OBSFREQ 500.16 MHz  
 OBSSET 2.41 KHz  
 OBSFIN 6.01 Hz  
 POINT 28214  
 FREOU 7507.51 Hz  
 SCANS 8  
 ACQTM 1.7459 sec  
 PD 5.0000 sec  
 PULP 5.55 usec  
 1H  
 IRNUC 21.2 c  
 CTEMP CDCL3  
 SLVNT 0.00 ppm  
 EXREF 0.12 Hz  
 BF 30  
 RGAIN

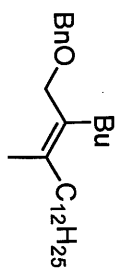

7



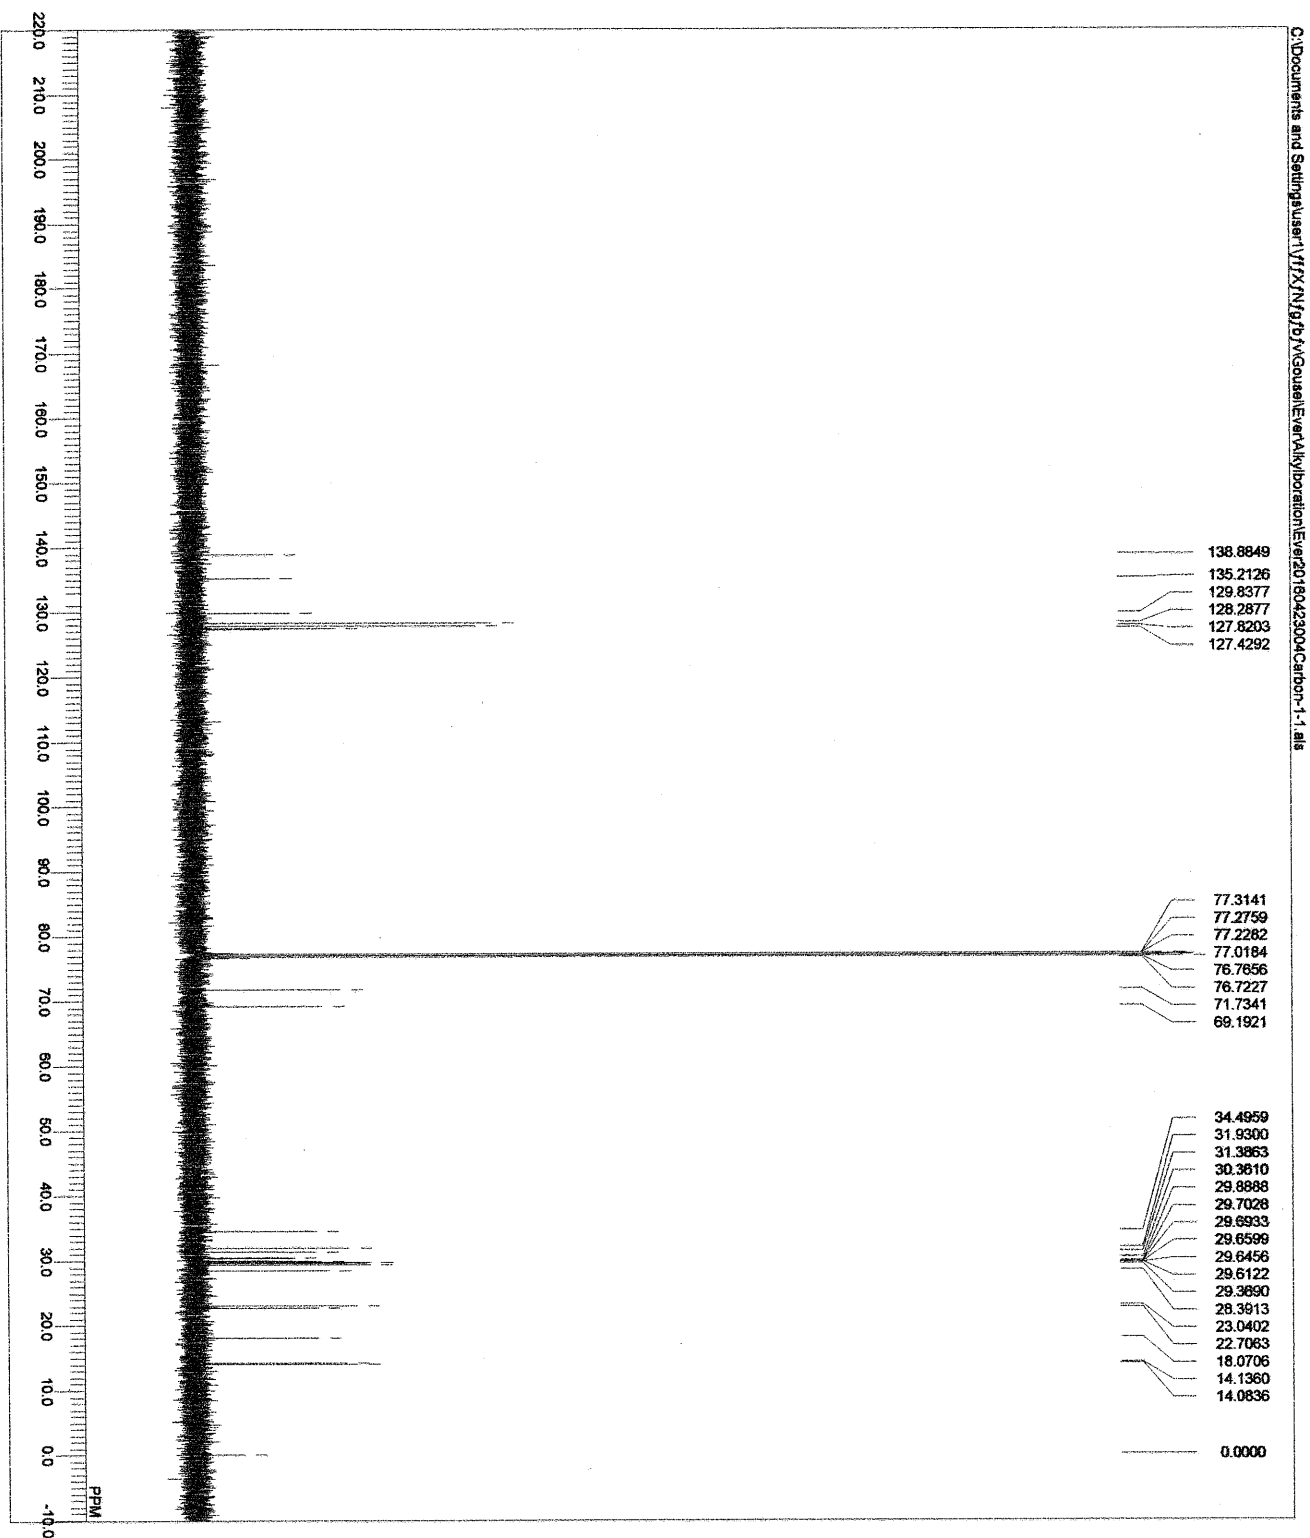

FILE Ever2016042304Carbon-1-1.a16  
 COMMENT No. 2927 Carbon  
 DATE 2016-04-23 18:18:41  
 INSTRUMENT spect  
 PULPROG zgpg30  
 EXMODE EXMODE  
 OBSFREQ 125.77 MHz  
 OBSSET 7.87 KHz  
 OFPIN 4.21 Hz  
 POINT 52428  
 FREOU 31446.54 Hz  
 SCANS 128  
 ACQTM 0.8336 sec  
 PD 2.0000 sec  
 PVM 3.40 usec  
 INNUC 1H  
 CTEMP 21.7 c  
 CDCL3  
 SLVNT CDCL3  
 EXREF 0.00 ppm  
 BF 0.12 Hz  
 RGAIN 60

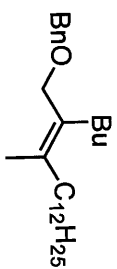

7
